# Supplementary material for: Oxidative annulation of acetophenones and 2-aminobenzothiazoles catalyzed by reusable nickel-doped LaMnO3 perovskites
Source: Royal Society of Chemistry journal article supplement (doi:10.1039/d2ra08045a), 2023-01-01

## 1. Characterization of the perovskites

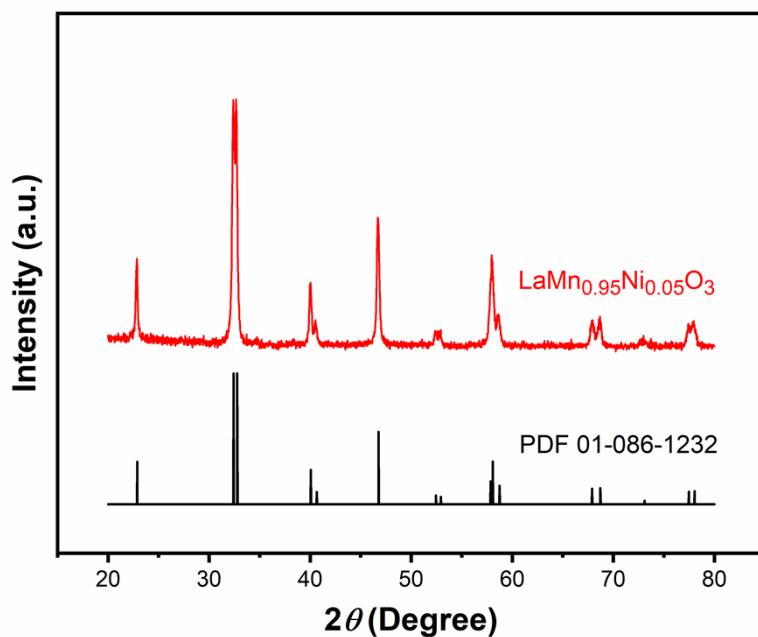

**Fig. S1.** X-ray diffraction patterns of  $\text{LaMn}_{0.95}\text{Ni}_{0.05}\text{O}_3$ . This is identical to Fig. 1 of the manuscript.

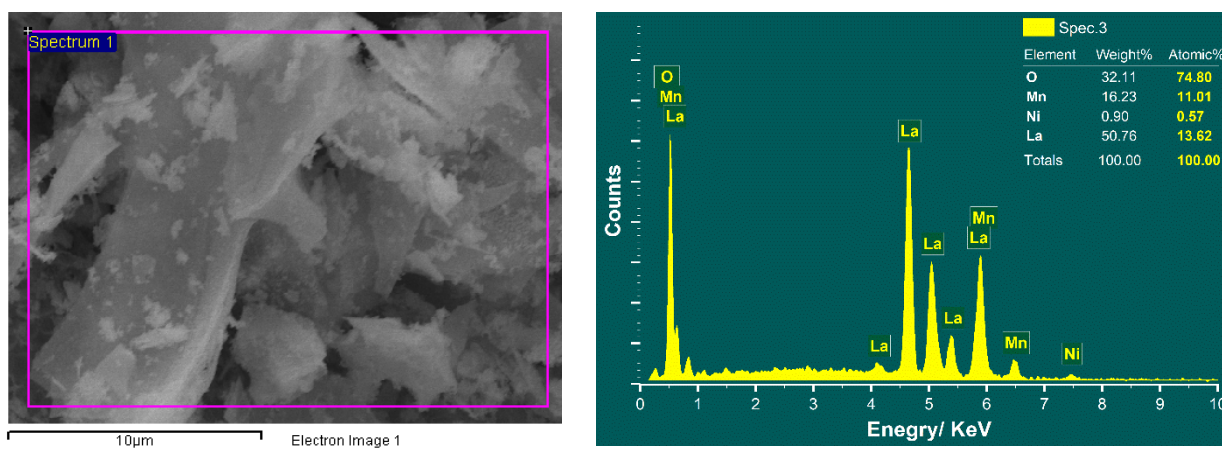

**Fig. S2.** SEM-EDX spectrum of  $\text{LaMn}_{0.95}\text{Ni}_{0.05}\text{O}_3$ .

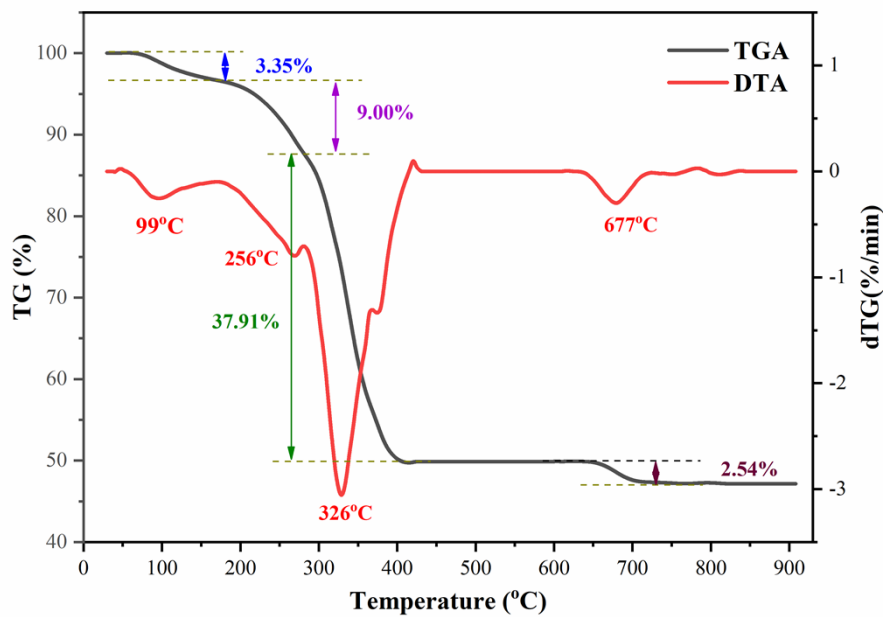

Fig. S3. TGA/DTA curve of  $\text{LaMn}_{0.95}\text{Ni}_{0.05}\text{O}_3$ .

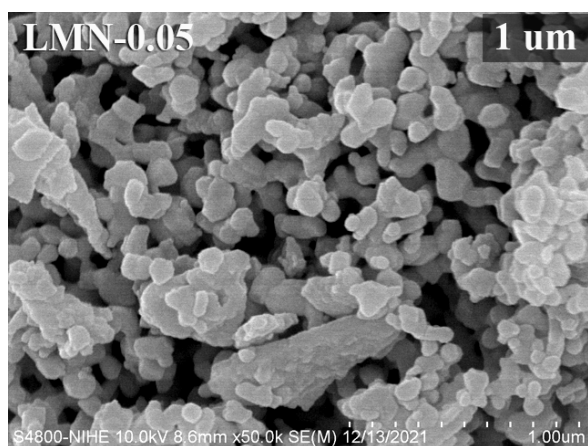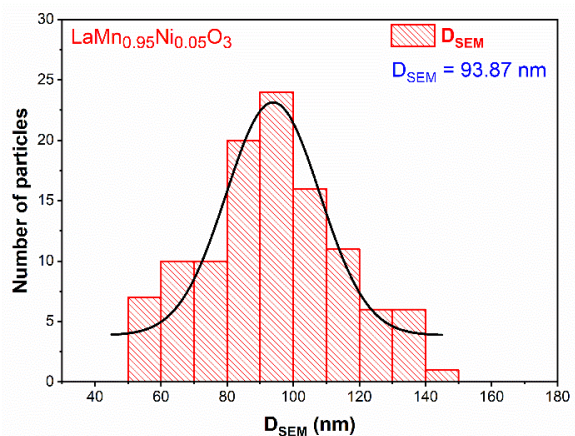

Fig. S4. FE-SEM image (left) and particle size distribution histogram (right) of  $\text{LaMn}_{0.95}\text{Ni}_{0.05}\text{O}_3$ .

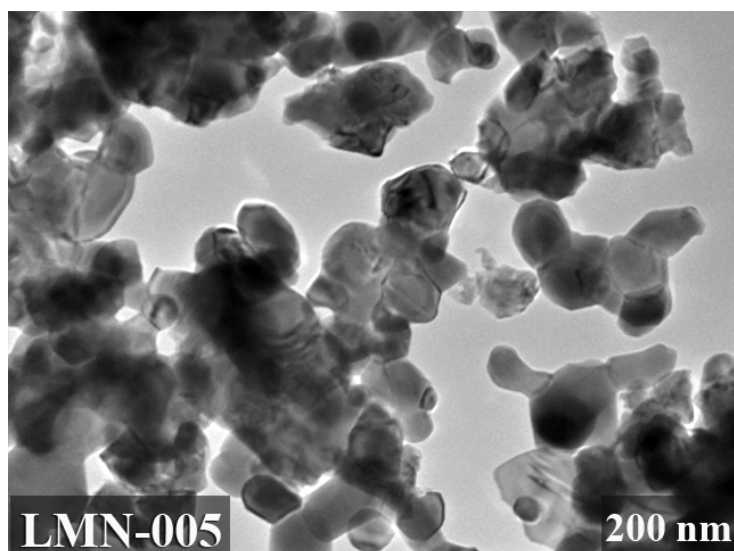

Fig. S5. TEM image of  $\text{LaMn}_{0.95}\text{Ni}_{0.05}\text{O}_3$ .

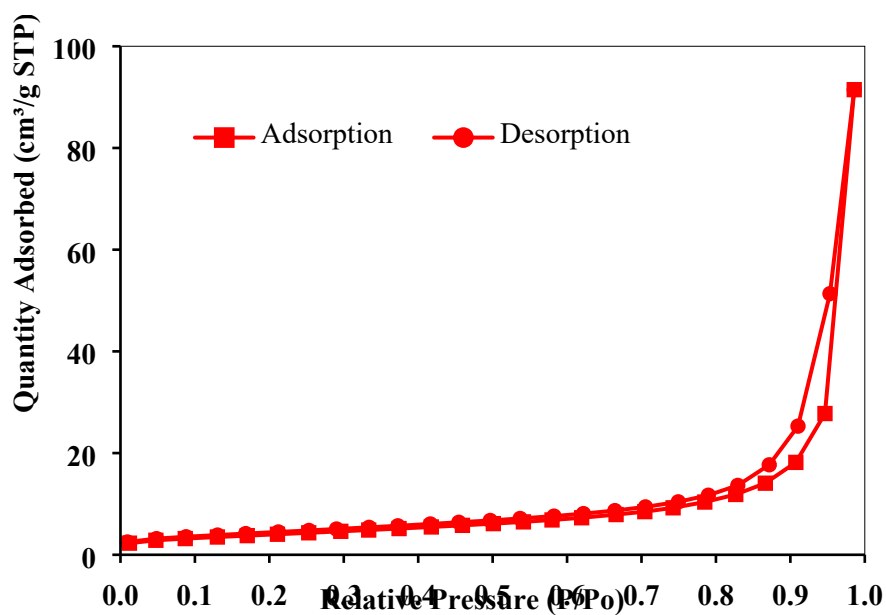

Fig. S6. Nitrogen physisorption isotherm of  $\text{LaMn}_{0.95}\text{Ni}_{0.05}\text{O}_3$  at 77K.

## 2. Characterization of compounds

### 2-Phenylbenzo[d]imidazo[2,1-b]thiazole (3aa)

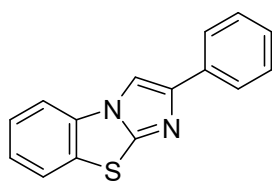

Yellow solid, 35 mg (70% yield). This compound is known [1].

$^1\text{H}$  NMR (600 MHz,  $\text{CDCl}_3$ , ppm)  $\delta$  7.94 (s, 1H), 7.87 (d,  $J = 7.2$  Hz, 2H), 7.67 (d,  $J = 7.9$  Hz, 1H), 7.57 (d,  $J = 8.0$  Hz, 1H), 7.44 – 7.40 (m, 3H), 7.34 – 7.27 (m, 2H).  $^{13}\text{C}$  NMR (151 MHz,  $\text{CDCl}_3$ , ppm)  $\delta$  148.12, 147.69, 133.82, 132.17, 130.31, 128.75, 127.55, 126.20, 125.22, 124.89, 124.40, 112.65, 106.88.

### 7-Methyl-2-phenylbenzo[*d*]imidazo[2,1-*b*]thiazole (3ba)

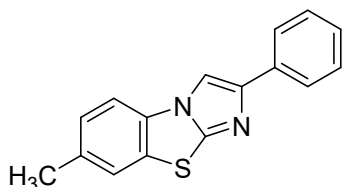

Yellow solid, 38 mg (72% yield). This compound is known [2].

$^1\text{H}$  NMR (500 MHz,  $\text{CDCl}_3$ , ppm)  $\delta$  7.91 (s, 1H), 7.88 – 7.84 (m, 2H), 7.47 (s, 1H), 7.46 (d,  $J = 8.4$  Hz, 1H), 7.44 – 7.37 (m, 2H), 7.31 – 7.26 (m, 1H), 7.24 – 7.20 (m, 1H), 2.45 (s, 3H).  $^{13}\text{C}$  NMR (126 MHz,  $\text{CDCl}_3$ , ppm)  $\delta$  147.98, 147.42, 135.03, 133.92, 130.33, 130.16, 128.72, 127.43, 127.15, 125.17, 124.46, 112.25, 106.82, 21.36.

### 2-Phenyl-7-(trifluoromethoxy)benzo[*d*]imidazo[2,1-*b*]thiazole (3ca)

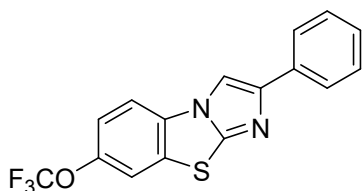

Yellow solid, 47 mg (70% yield).

$^1\text{H}$  NMR (500 MHz,  $\text{CDCl}_3$ , ppm)  $\delta$  7.95 (s, 1H), 7.88 – 7.84 (m, 2H), 7.60 (d,  $J = 8.8$  Hz, 1H), 7.59 (s, 1H), 7.46 – 7.39 (m, 2H), 7.35 – 7.28 (m, 2H).  $^{13}\text{C}$  NMR (126 MHz,  $\text{CDCl}_3$ , ppm)  $\delta$  148.20, 148.05, 145.85 (d,  $J = 1.9$  Hz), 133.47, 131.60, 130.82, 128.79, 127.80, 125.26, 120.50 (d,  $J = 258.0$  Hz), 119.78, 117.63, 113.15, 107.00. HRMS (ESI,  $m/z$ ): calcd for  $\text{C}_{16}\text{H}_{10}\text{F}_3\text{N}_2\text{OS}$  [ $\text{M}+\text{H}^+$ ] 335.0460, found: 335.0467.

### 7-Chloro-2-phenylbenzo[*d*]imidazo[2,1-*b*]thiazole (3da)

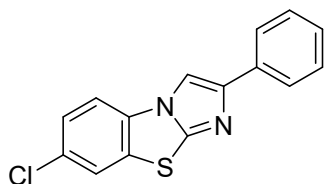

Yellow solid, 32 mg (56% yield). This compound is known [1].

$^1\text{H}$  NMR (500 MHz,  $\text{CDCl}_3$ , ppm)  $\delta$  7.91 (s, 1H), 7.86 – 7.83 (m, 2H), 7.67 (d,  $J = 2.0$  Hz, 1H), 7.51 (d,  $J = 8.6$  Hz, 1H), 7.45 – 7.38 (m, 3H), 7.34 – 7.27 (m, 1H).  $^{13}\text{C}$  NMR (126 MHz,  $\text{CDCl}_3$ , ppm)  $\delta$  148.05, 147.86, 133.53, 131.72, 130.78, 130.35, 128.77, 127.73, 126.61, 125.25, 124.16, 113.27, 106.94.

### 7-Fluoro-2-phenylbenzo[*d*]imidazo[2,1-*b*]thiazole (3ea)

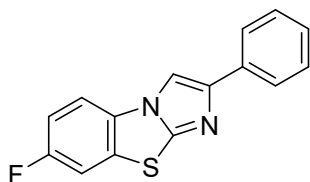

Yellow solid, 32 mg (62% yield).

$^1\text{H}$  NMR (600 MHz,  $\text{CDCl}_3$ , ppm)  $\delta$  7.92 (s, 1H), 7.88 – 7.83 (m, 2H), 7.54 (dd,  $J = 8.8, 4.3$  Hz, 1H), 7.46 – 7.38 (m, 3H), 7.33 – 7.28 (m, 1H), 7.17 (td,  $J = 8.7, 2.5$  Hz, 1H).  $^{13}\text{C}$  NMR (126 MHz,  $\text{CDCl}_3$ , ppm)  $\delta$  159.76 (d,  $J = 245.5$  Hz), 147.87, 147.76, 133.66, 131.64 (d,  $J = 10.2$  Hz), 128.76, 127.64, 125.21, 113.88 (d,  $J = 24.6$  Hz), 113.26 (d,  $J = 9.0$  Hz), 111.52 (d,  $J = 27.3$  Hz), 106.95. One carbon signal could not be located. HRMS (ESI,  $m/z$ ): calcd for  $\text{C}_{15}\text{H}_{10}\text{FN}_2\text{S}$  [ $\text{M}+\text{H}^+$ ] 269.0543, found: 269.0549.

### 6-Bromo-2-phenylbenzo[*d*]imidazo[2,1-*b*]thiazole (3fa)

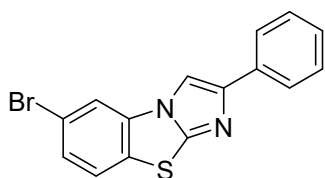

Yellow solid, 40 mg (61% yield).

$^1\text{H}$  NMR (600 MHz,  $\text{CDCl}_3$ , ppm)  $\delta$  7.92 (s, 1H), 7.88 – 7.83 (m, 2H), 7.77 (d,  $J = 1.8$  Hz, 1H), 7.55 (d,  $J = 8.4$  Hz, 1H), 7.45 (dd,  $J = 8.5, 1.8$  Hz, 1H), 7.42 (t,  $J = 7.7$  Hz, 2H), 7.33 – 7.29 (m, 1H).  $^{13}\text{C}$  NMR (151 MHz,  $\text{CDCl}_3$ , ppm)  $\delta$  148.38, 148.15, 133.47, 133.06, 129.21, 128.79, 127.88, 127.80, 125.44, 125.28, 119.57, 115.93, 106.85. HRMS (ESI,  $m/z$ ): calcd for  $\text{C}_{15}\text{H}_{10}^{79}\text{BrN}_2\text{S}$  [ $\text{M}+\text{H}^+$ ] 328.9743, found: 328.9751.

### 2-(3-Methoxyphenyl)benzo[*d*]imidazo[2,1-*b*]thiazole (3ab)

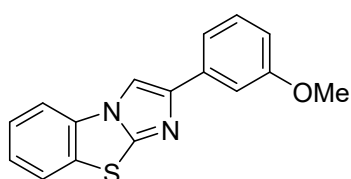

Yellow solid, 38 mg (68% yield). This compound is known [2].

$^1\text{H}$  NMR (600 MHz,  $\text{CDCl}_3$ , ppm)  $\delta$  7.97 (s, 1H), 7.70 (d,  $J = 8.0$  Hz, 1H), 7.61 (d,  $J = 8.0$  Hz, 1H), 7.51 – 7.42 (m, 3H), 7.36 – 7.31 (m, 2H), 6.86 (dd,  $J = 8.1, 2.4$  Hz, 1H), 3.89 (s, 3H).  $^{13}\text{C}$  NMR (126 MHz,  $\text{CDCl}_3$ , ppm)  $\delta$  160.11, 148.07, 147.59, 135.22, 132.20, 130.37, 129.74, 126.24, 124.95, 124.44, 117.67, 113.83, 112.69, 110.31, 107.12, 55.40.

### 2-(3-Chlorophenyl)benzo[*d*]imidazo[2,1-*b*]thiazole (3ac)

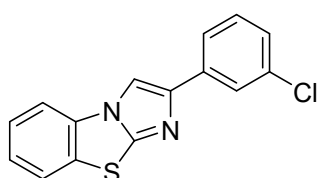

Yellow solid, 32 mg (57% yield).

$^1\text{H}$  NMR (600 MHz,  $\text{CDCl}_3$ , ppm)  $\delta$  7.96 (s, 1H), 7.87 (t,  $J = 1.8$  Hz, 1H), 7.74 (dt,  $J = 7.7, 1.3$  Hz, 1H), 7.72 – 7.69 (m, 1H), 7.60 (d,  $J = 8.0$  Hz, 1H), 7.46 (td,  $J = 7.8, 1.1$  Hz, 1H), 7.38 – 7.31 (m, 2H), 7.28 – 7.22 (m, 1H).  $^{13}\text{C}$  NMR (126 MHz,  $\text{CDCl}_3$ , ppm)  $\delta$  148.37, 146.32, 135.64, 134.76, 132.07, 130.36, 129.97, 127.45, 126.31, 125.30, 125.11, 124.47, 123.23, 112.72, 107.39. HRMS (ESI,  $m/z$ ): calcd for  $\text{C}_{15}\text{H}_{10}^{35}\text{ClN}_2\text{S}$  [ $\text{M}+\text{H}^+$ ] 285.0248, found: 285.0258.

### 2-(*m*-Tolyl)benzo[*d*]imidazo[2,1-*b*]thiazole (3ad)

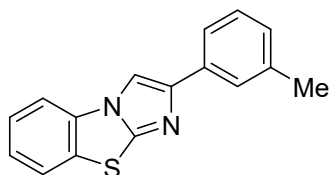

Yellow solid, 41 mg (77% yield).

$^1\text{H}$  NMR (600 MHz,  $\text{CDCl}_3$ , ppm)  $\delta$  7.96 (s, 1H), 7.74 (s, 1H), 7.72 – 7.68 (m, 1H), 7.65 (d,  $J = 7.7$  Hz, 1H), 7.62 – 7.59 (m, 1H), 7.45 (td,  $J = 7.8, 1.1$  Hz, 1H), 7.34 (td,  $J = 8.0, 1.1$  Hz, 1H), 7.31 (t,  $J = 7.6$  Hz, 1H), 7.12 (d,  $J = 7.5$  Hz, 1H), 2.42 (s, 3H).  $^{13}\text{C}$  NMR (151 MHz,  $\text{CDCl}_3$ , ppm)  $\delta$  148.07, 147.85, 138.41, 133.70, 132.25, 130.36, 128.64, 128.35, 126.21, 125.98, 124.86, 124.43, 122.28, 112.64, 106.82, 21.49. HRMS (ESI,  $m/z$ ): calcd for  $\text{C}_{16}\text{H}_{13}\text{N}_2\text{S}$  [ $\text{M}+\text{H}^+$ ] 265.0794, found: 265.0799.

### 2-(4-Methoxyphenyl)benzo[d]imidazo[2,1-b]thiazole (3ae)

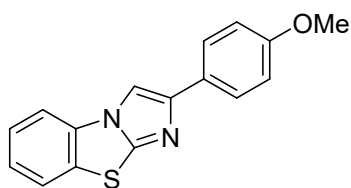

Yellow solid, 46 mg (82% yield). This compound is known [1].

$^1\text{H}$  NMR (600 MHz,  $\text{CDCl}_3$ , ppm)  $\delta$  7.87 (s, 1H), 7.82 – 7.77 (m, 2H), 7.71 – 7.67 (m, 1H), 7.61 – 7.56 (m, 1H), 7.44 (td,  $J = 7.8, 1.1$  Hz, 1H), 7.32 (td,  $J = 8.0, 1.1$  Hz, 1H), 6.98 – 6.93 (m, 2H), 3.85 (s, 3H).  $^{13}\text{C}$  NMR (151 MHz,  $\text{CDCl}_3$ , ppm)  $\delta$  159.25, 147.94, 147.67, 132.28, 130.26, 126.71, 126.50, 126.17, 124.71, 124.39, 114.18, 112.55, 105.84, 55.35.

### 2-(3-Bromophenyl)benzo[d]imidazo[2,1-b]thiazole (3af)

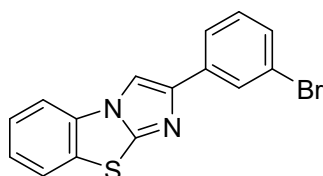

Yellow solid, 40 mg (61% yield). This compound is known [1].

$^1\text{H}$  NMR (600 MHz,  $\text{CDCl}_3$ , ppm)  $\delta$  8.03 (t,  $J = 1.6$  Hz, 1H), 7.97 (s, 1H), 7.79 (d,  $J = 7.8$  Hz, 1H), 7.71 (d,  $J = 8.0$  Hz, 1H), 7.61 (d,  $J = 8.0$  Hz, 1H), 7.49 – 7.44 (m, 1H), 7.41 (ddd,  $J = 7.9$ , 1.8, 0.9 Hz, 1H), 7.38 – 7.33 (m, 1H), 7.28 (d,  $J = 7.8$  Hz, 1H).  $^{13}\text{C}$  NMR (151 MHz,  $\text{CDCl}_3$ , ppm)  $\delta$  148.38, 146.17, 135.90, 132.06, 130.37, 130.26, 128.19, 126.32, 125.12, 124.47, 123.68, 122.96, 112.72, 107.40. One carbon signal could not be located.

### 2-(4-Fluorophenyl)benzo[d]imidazo[2,1-b]thiazole (3ag)

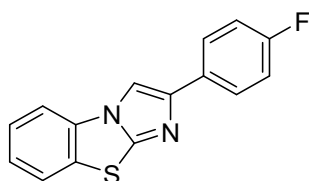

Yellow solid, 29 mg (53% yield).

$^1\text{H}$  NMR (600 MHz,  $\text{CDCl}_3$ , ppm)  $\delta$  7.91 (s, 1H), 7.86 – 7.81 (m, 2H), 7.71 (d,  $J = 8.5$  Hz, 1H), 7.61 (d,  $J = 8.0$  Hz, 1H), 7.46 (td,  $J = 7.8$ , 1.1 Hz, 1H), 7.35 (td,  $J = 8.0$ , 1.1 Hz, 1H), 7.13 – 7.08 (m, 2H).  $^{13}\text{C}$  NMR (151 MHz,  $\text{CDCl}_3$ , ppm)  $\delta$  162.41 (d,  $J = 246.5$  Hz), 148.21, 146.83, 132.16, 130.31, 130.05 (d,  $J = 3.3$  Hz), 126.89 (d,  $J = 7.9$  Hz), 126.27, 124.97, 124.46, 115.66 (d,  $J = 21.7$  Hz), 112.65, 106.54. HRMS (ESI,  $m/z$ ): calcd for  $\text{C}_{15}\text{H}_{10}\text{FN}_2\text{S}$  [ $\text{M}+\text{H}^+$ ] 269.0543, found: 269.0555.

### 2-(4-(Trifluoromethyl)phenyl)benzo[d]imidazo[2,1-b]thiazole (3ah)

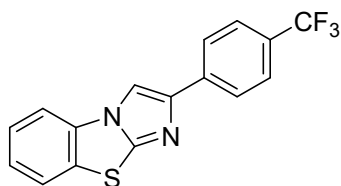

Yellow solid, 33 mg (50% yield). This compound is known [1].

$^1\text{H}$  NMR (600 MHz,  $\text{CDCl}_3$ , ppm)  $\delta$  8.04 (s, 1H), 7.97 (d,  $J = 8.1$  Hz, 2H), 7.74 – 7.70 (m, 1H), 7.66 (d,  $J = 8.1$  Hz, 2H), 7.64 – 7.61 (m, 1H), 7.47 (td,  $J = 7.8$ , 1.1 Hz, 1H), 7.37 (td,  $J = 8.0$ , 1.1 Hz, 1H).  $^{13}\text{C}$  NMR (151 MHz,  $\text{CDCl}_3$ , ppm)  $\delta$  148.65, 146.23, 137.24, 132.03, 130.41,



129.30 (q,  $J = 32.4$  Hz), 125.74 (q,  $J = 3.8$  Hz), 125.45 (q,  $J = 278.9$  Hz), 125.27, 125.20, 112.79, 107.94. Two carbon signals could not be located.

#### 4-(Benzo[d]imidazo[2,1-b]thiazol-2-yl)benzonitrile (3ai)

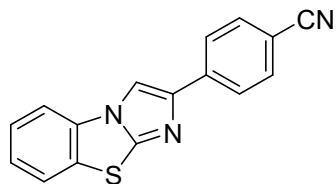

Yellow solid, 31 mg (57% yield).

$^1\text{H}$  NMR (600 MHz,  $\text{CDCl}_3$ , ppm)  $\delta$  8.08 (s, 1H), 7.97 (d,  $J = 8.3$  Hz, 2H), 7.76 – 7.71 (m, 1H), 7.69 (d,  $J = 8.3$  Hz, 2H), 7.67 – 7.62 (m, 1H), 7.51 – 7.46 (m, 1H), 7.43 – 7.37 (m, 1H).  $^{13}\text{C}$  NMR (151 MHz,  $\text{CDCl}_3$ , ppm)  $\delta$  148.94, 138.23, 132.64, 131.92, 130.45, 126.46, 125.51, 125.48, 124.59, 119.08, 112.88, 110.64. Two carbon signals could not be located. HRMS (ESI,  $m/z$ ): calcd for  $\text{C}_{16}\text{H}_{10}\text{N}_3\text{S}$  [ $\text{M}+\text{H}^+$ ] 276.0590, found: 276.0599.

#### 2-(Pyridin-2-yl)benzo[d]imidazo[2,1-b]thiazole (3aj)

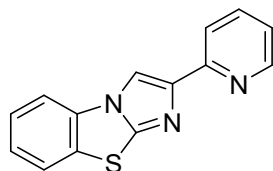

Yellow solid, 28 mg (55% yield).

$^1\text{H}$  NMR (500 MHz,  $\text{CDCl}_3$ , ppm)  $\delta$  8.58 (ddd,  $J = 4.8, 1.6, 0.8$  Hz, 1H), 8.40 (s, 1H), 8.07 – 7.05 (m, 1H), 7.75 (td,  $J = 7.7, 1.8$  Hz, 1H), 7.73 – 7.68 (m, 1H), 7.67 – 7.60 (m, 1H), 7.45 (td,  $J = 7.9, 1.1$  Hz, 1H), 7.35 (td,  $J = 8.0, 1.1$  Hz, 1H), 7.19 (ddd,  $J = 7.5, 4.8, 1.1$  Hz, 1H).  $^{13}\text{C}$  NMR (126 MHz,  $\text{CDCl}_3$ , ppm)  $\delta$  152.72, 149.33, 148.10, 147.59, 136.87, 132.11, 130.43, 126.36, 125.17, 124.40, 122.26, 119.75, 112.92, 109.87. HRMS (ESI,  $m/z$ ): calcd for  $\text{C}_{14}\text{H}_{10}\text{N}_3\text{S}$  [ $\text{M}+\text{H}^+$ ] 252.0590, found: 252.0595.

#### 2-(Thiophen-3-yl)benzo[d]imidazo[2,1-b]thiazole (3ak)

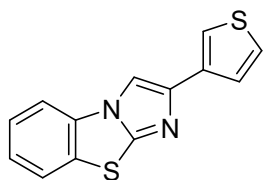

Yellow solid, 30 mg (59% yield).

$^1\text{H}$  NMR (600 MHz,  $\text{CDCl}_3$ , ppm)  $\delta$  7.85 (s, 1H), 7.72 – 7.69 (m, 2H), 7.61 – 7.58 (m, 1H), 7.47 – 7.44 (m, 2H), 7.37 (dd,  $J = 5.0, 3.0$  Hz, 1H), 7.36 – 7.32 (m, 1H).  $^{13}\text{C}$  NMR (151 MHz,  $\text{CDCl}_3$ , ppm)  $\delta$  148.05, 143.96, 135.52, 132.22, 130.32, 126.24, 126.15, 125.39, 124.87, 124.44, 120.31, 112.60, 106.75. HRMS (ESI,  $m/z$ ): calcd for  $\text{C}_{13}\text{H}_9\text{N}_2\text{S}_2$  [ $\text{M}+\text{H}^+$ ] 257.0202, found: 257.0211.

### 2-(Furan-3-yl)benzo[d]imidazo[2,1-b]thiazole (3al)

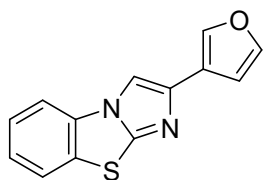

Yellow solid, 31 mg (64% yield). This compound is known [1].

$^1\text{H}$  NMR (600 MHz,  $\text{CDCl}_3$ , ppm)  $\delta$  7.89 (s, 1H), 7.71 – 7.67 (m, 1H), 7.61 – 7.57 (m, 1H), 7.48 – 7.43 (m, 2H), 7.34 (td,  $J = 8.0, 1.1$  Hz, 1H), 6.79 – 6.74 (m, 1H), 6.49 (dd,  $J = 3.3, 1.8$  Hz, 1H).  $^{13}\text{C}$  NMR (151 MHz,  $\text{CDCl}_3$ , ppm)  $\delta$  149.38, 148.42, 141.51, 139.73, 132.07, 130.34, 126.30, 124.99, 124.41, 112.68, 111.51, 106.64, 105.73.

### References

- [1]. S. Mishra, K. Monir, S. Mitra, A. Hajra, *Org. Lett.* **2014**, *16*, 6084.
- [2]. S. G. Balwe, Y. T. Jeong, *RSC Adv.* **2016**, *6*, 107225.

7.94  
7.87  
7.86  
7.68  
7.66  
7.58  
7.57  
7.44  
7.42  
7.41  
7.40  
7.33  
7.31  
7.30  
7.30  
7.29  
7.28  
7.25

-0.00

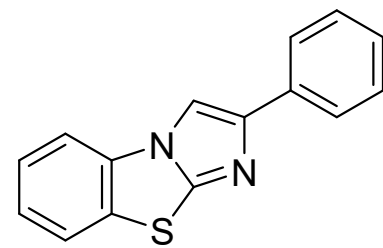

3aa, Scheme 1

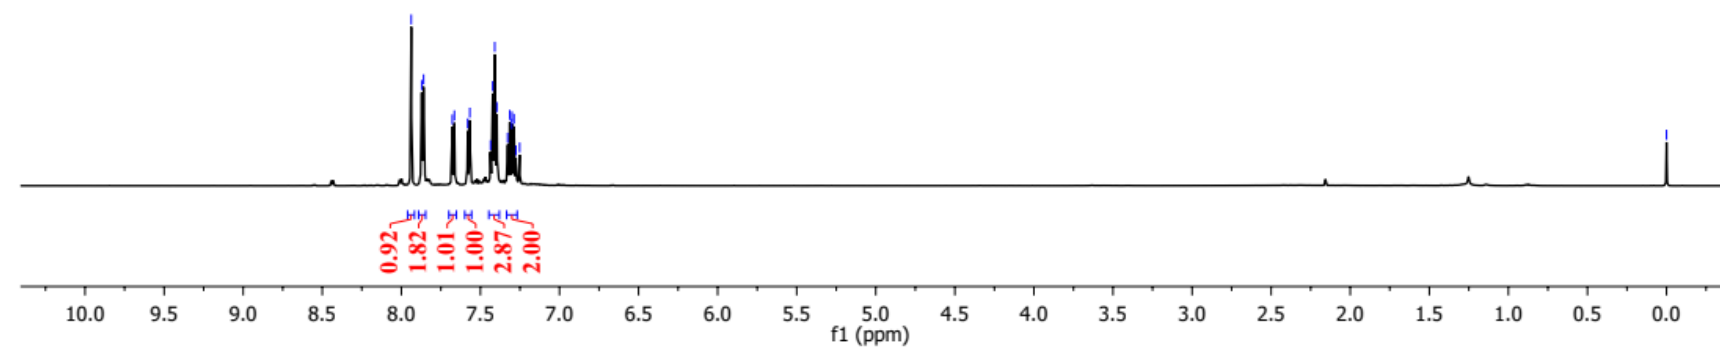

148.12  
147.69  
133.82  
132.17  
130.31  
128.75  
127.55  
126.20  
125.22  
124.89  
124.40  
— 112.65  
— 106.88

77.28  
77.07  
76.86

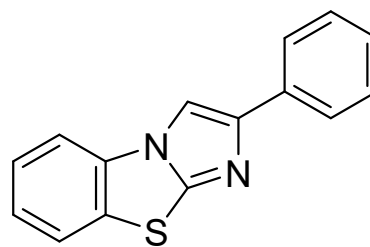

3aa, Scheme 1

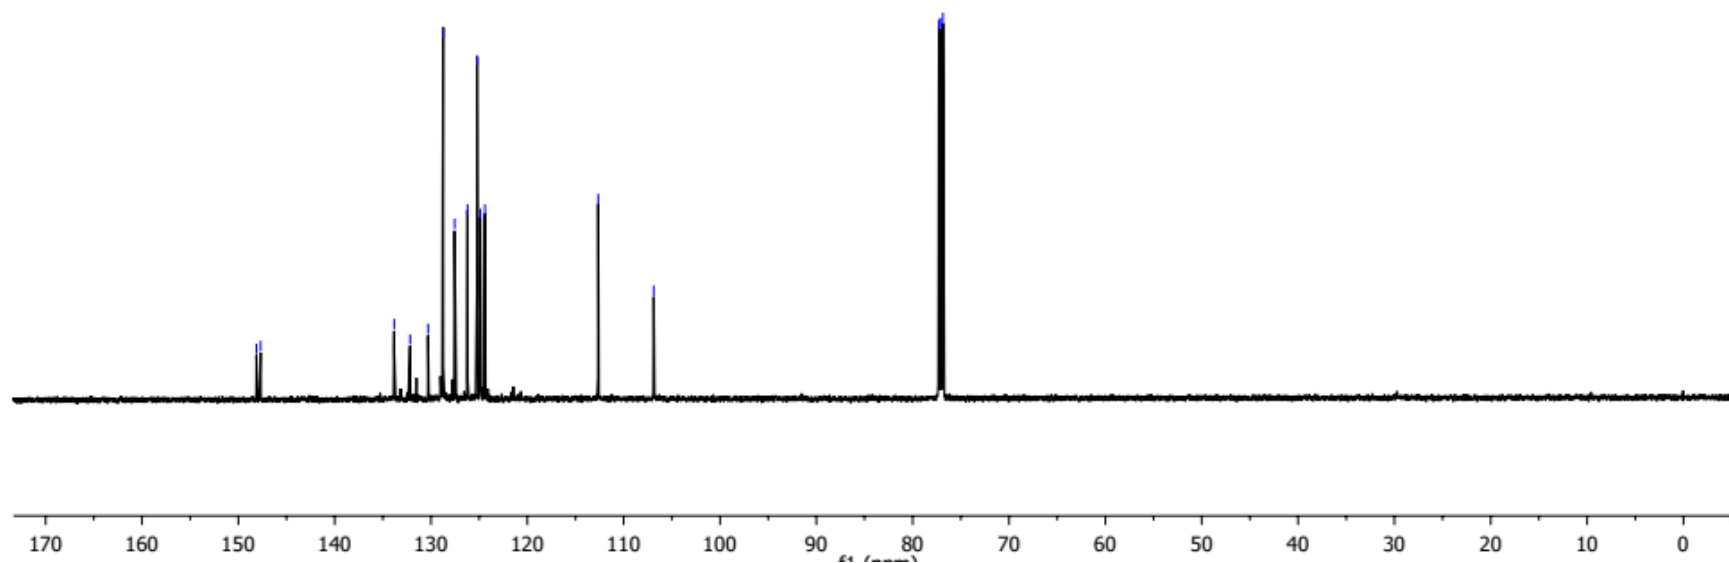

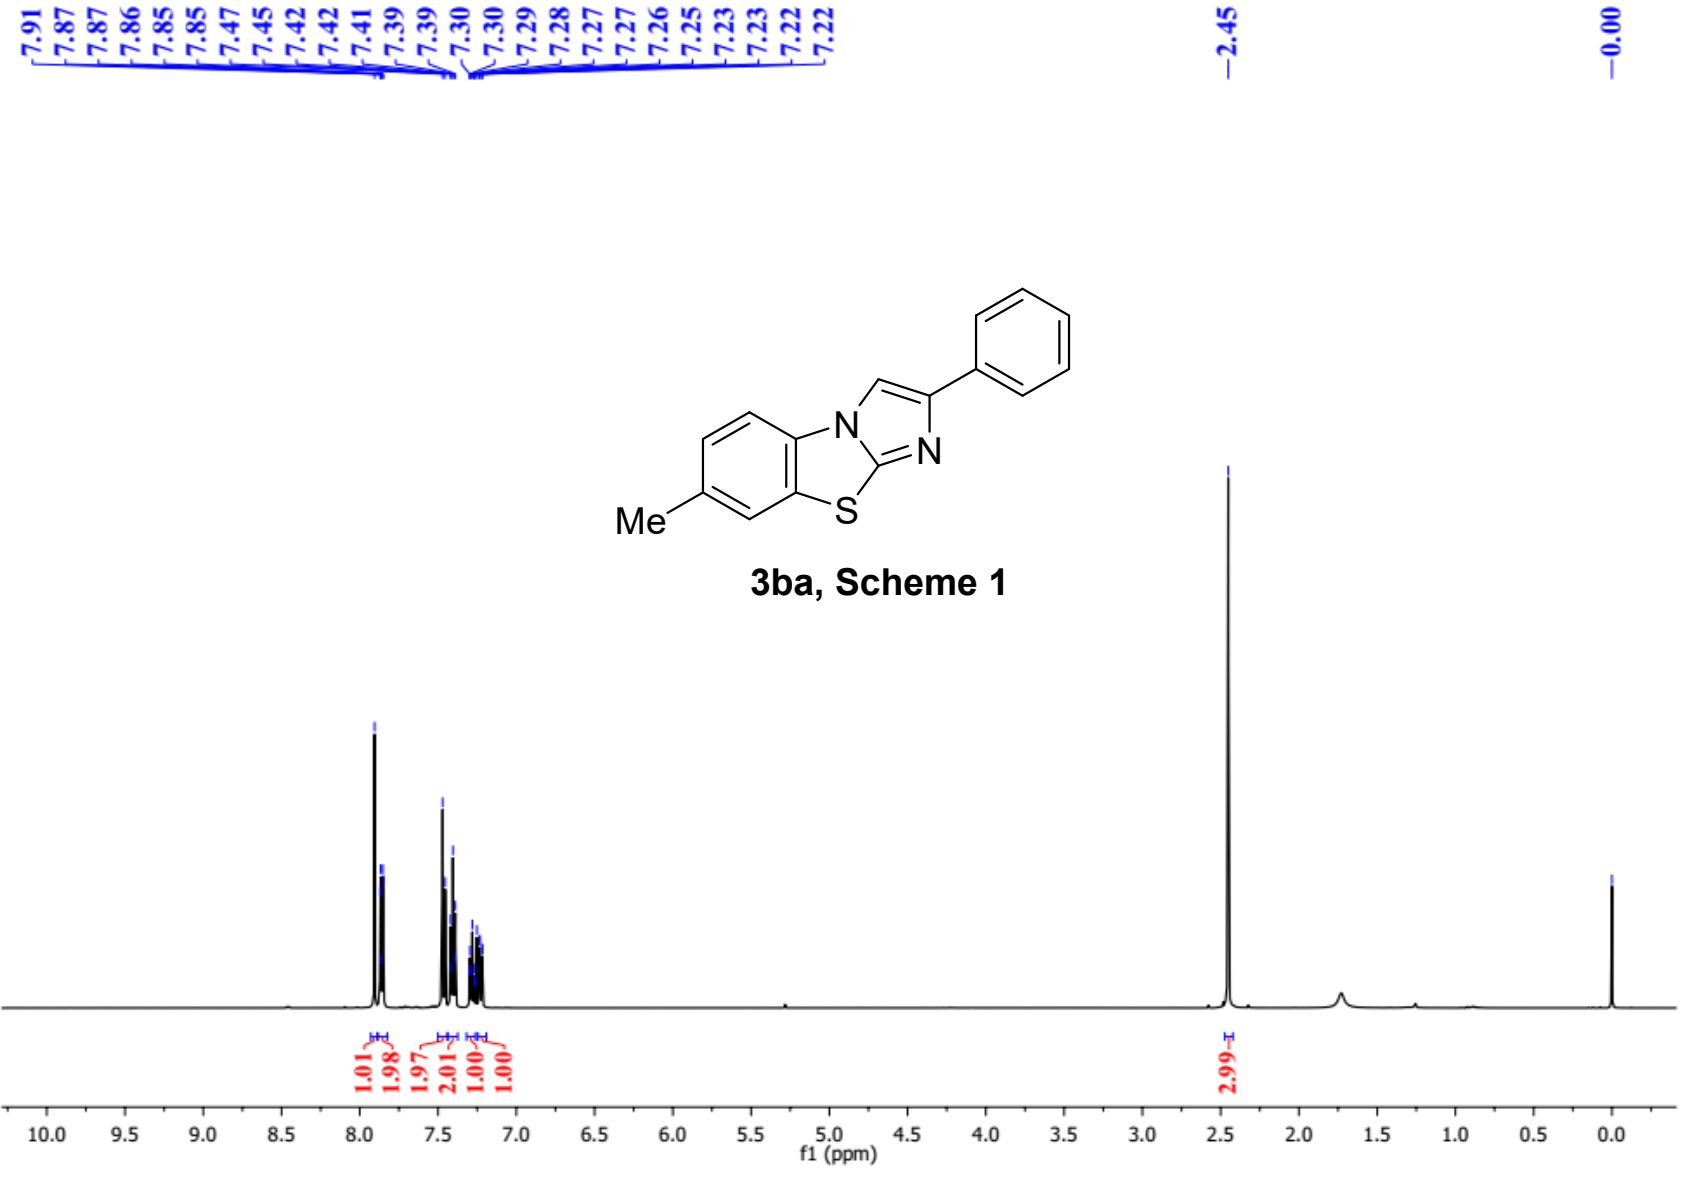

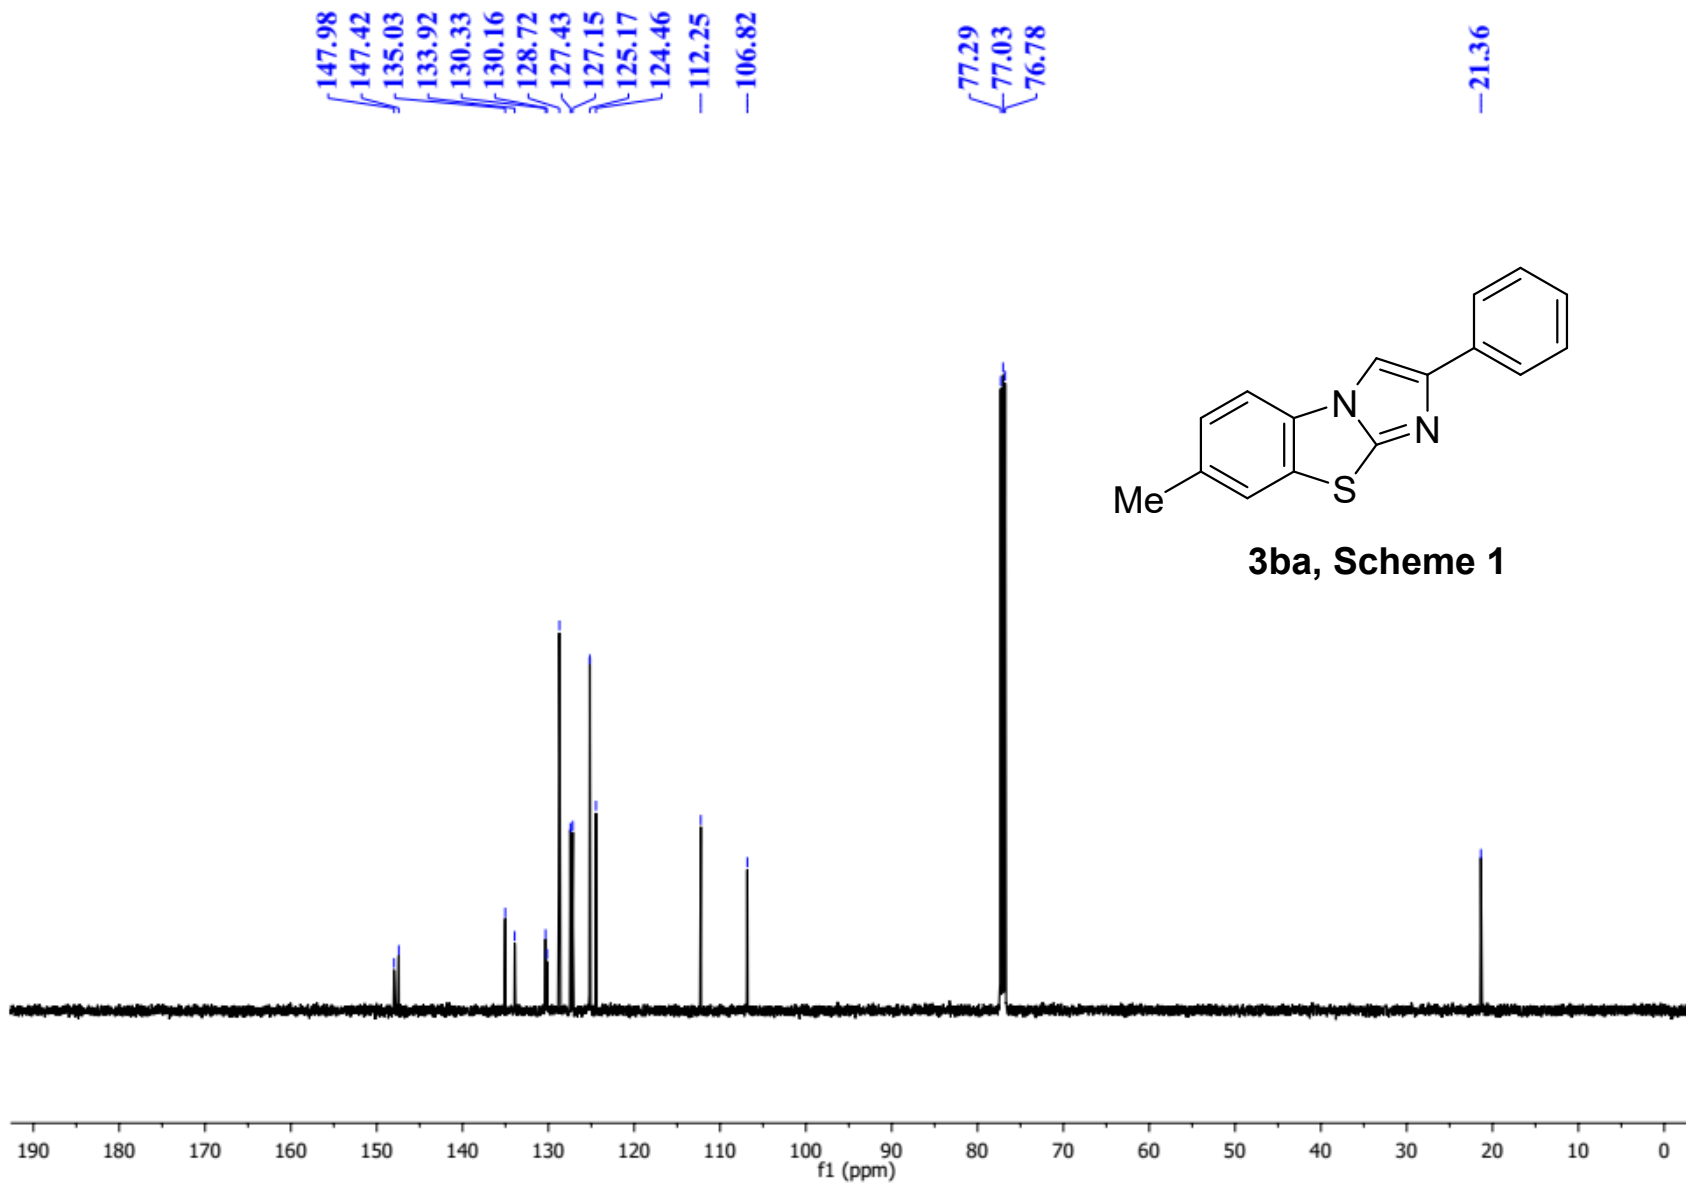

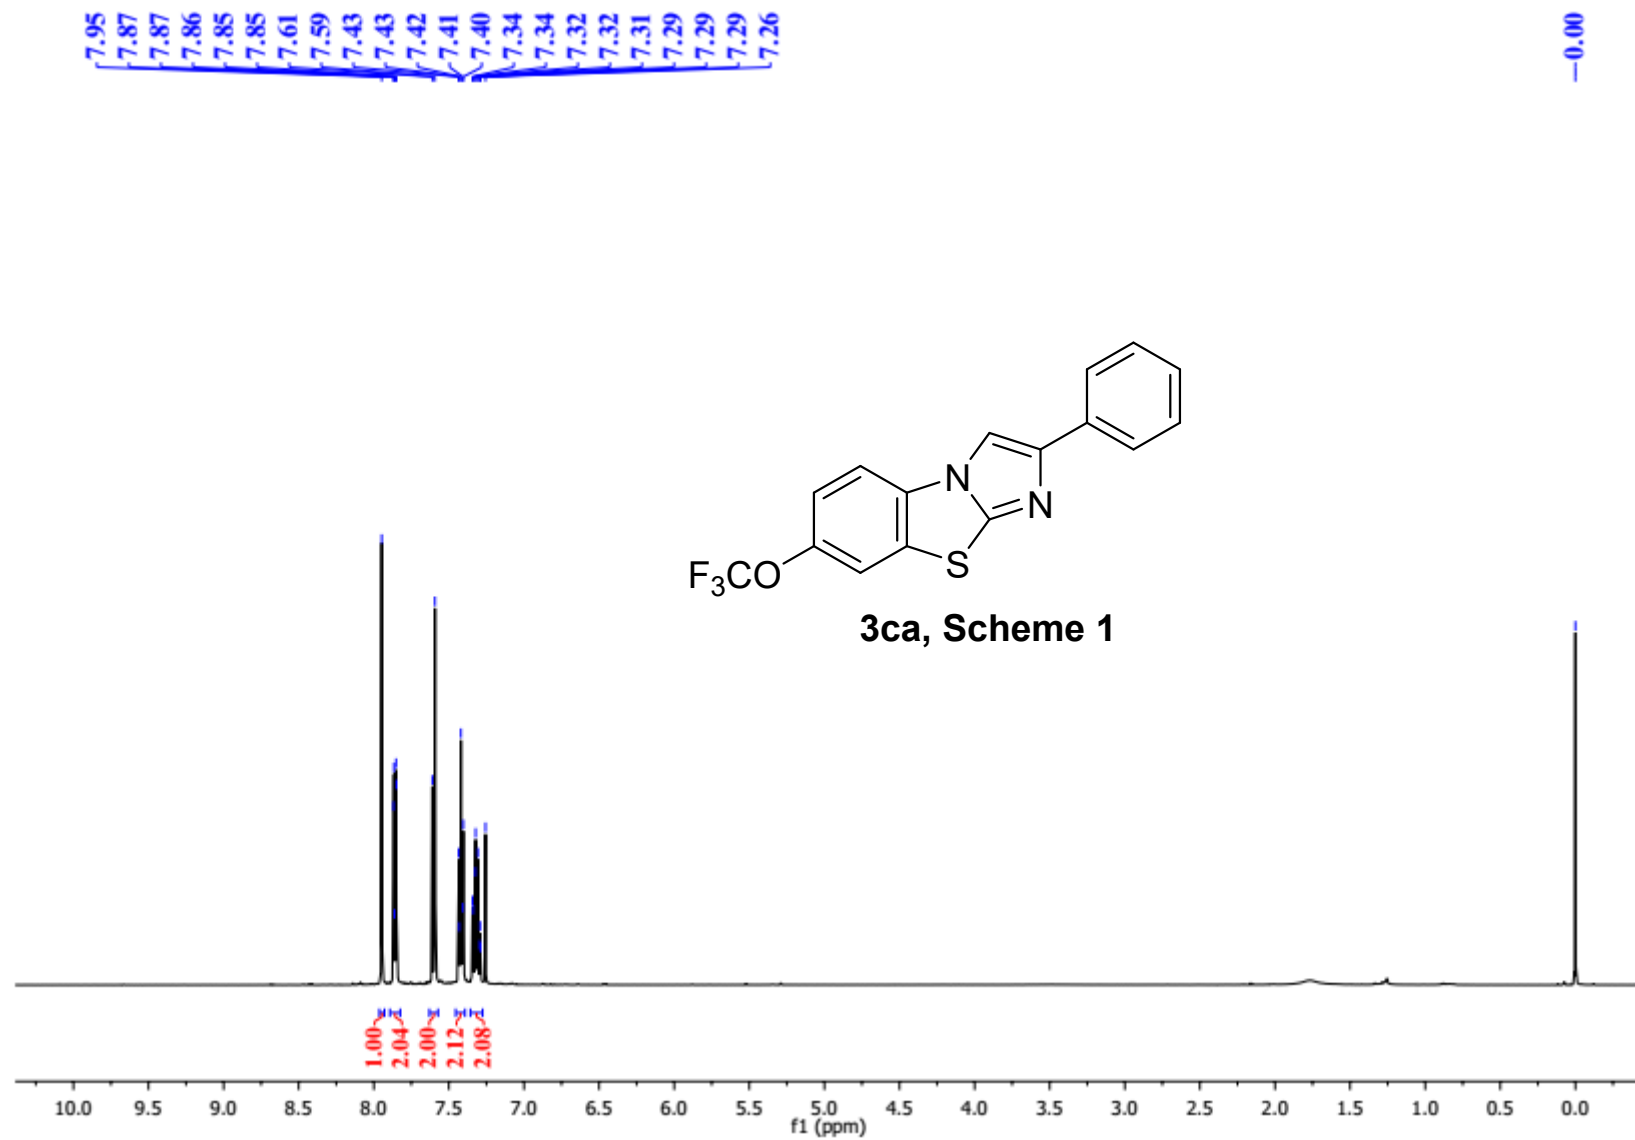

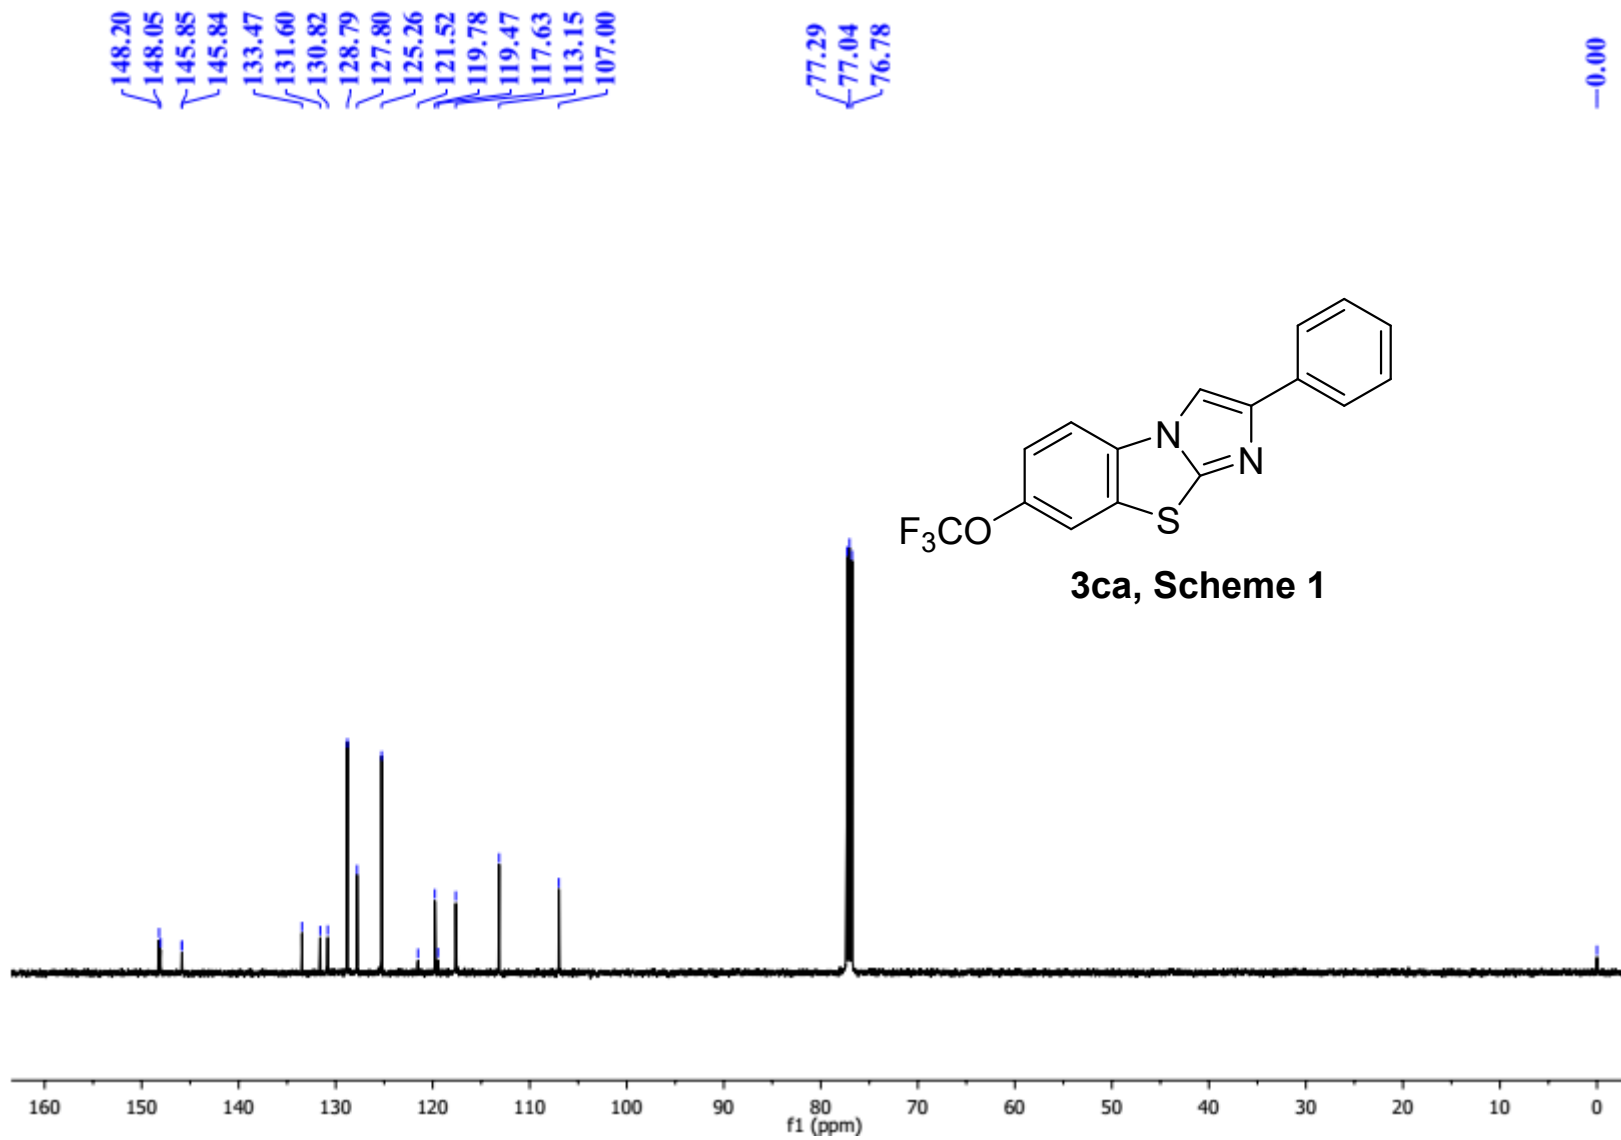



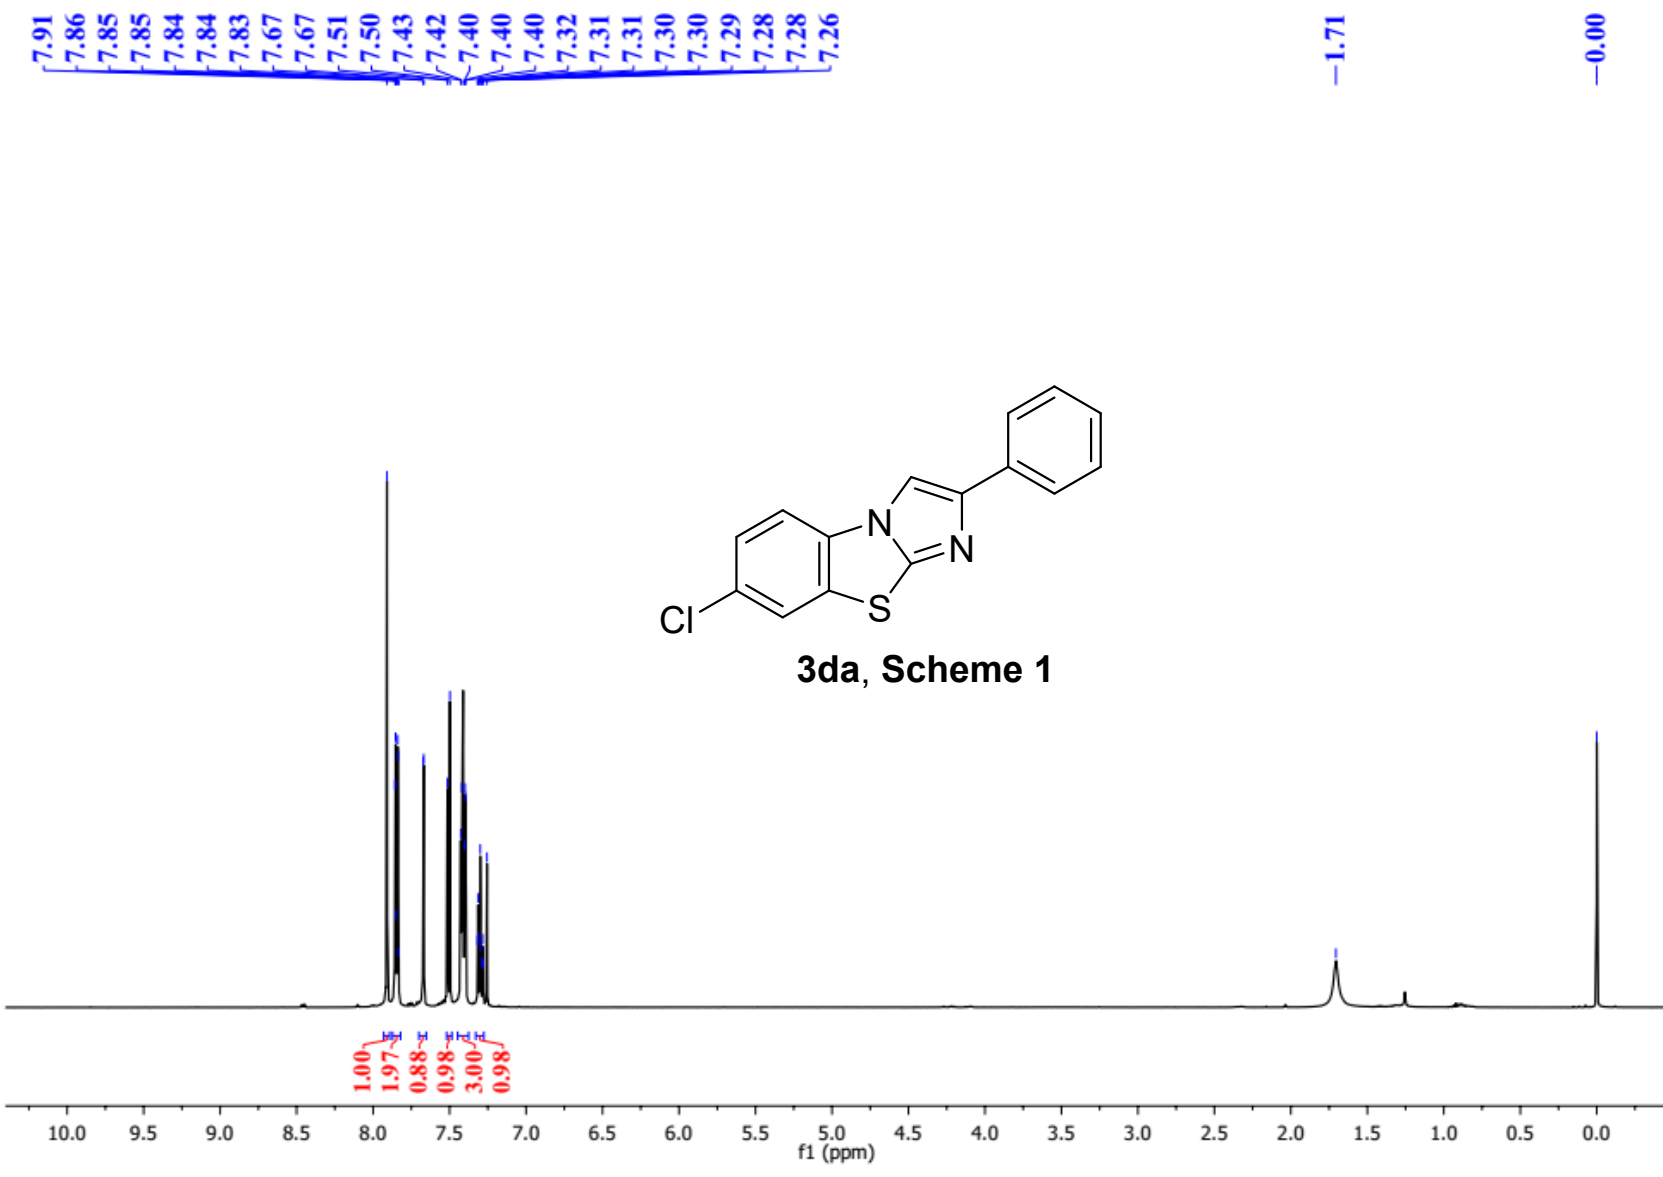

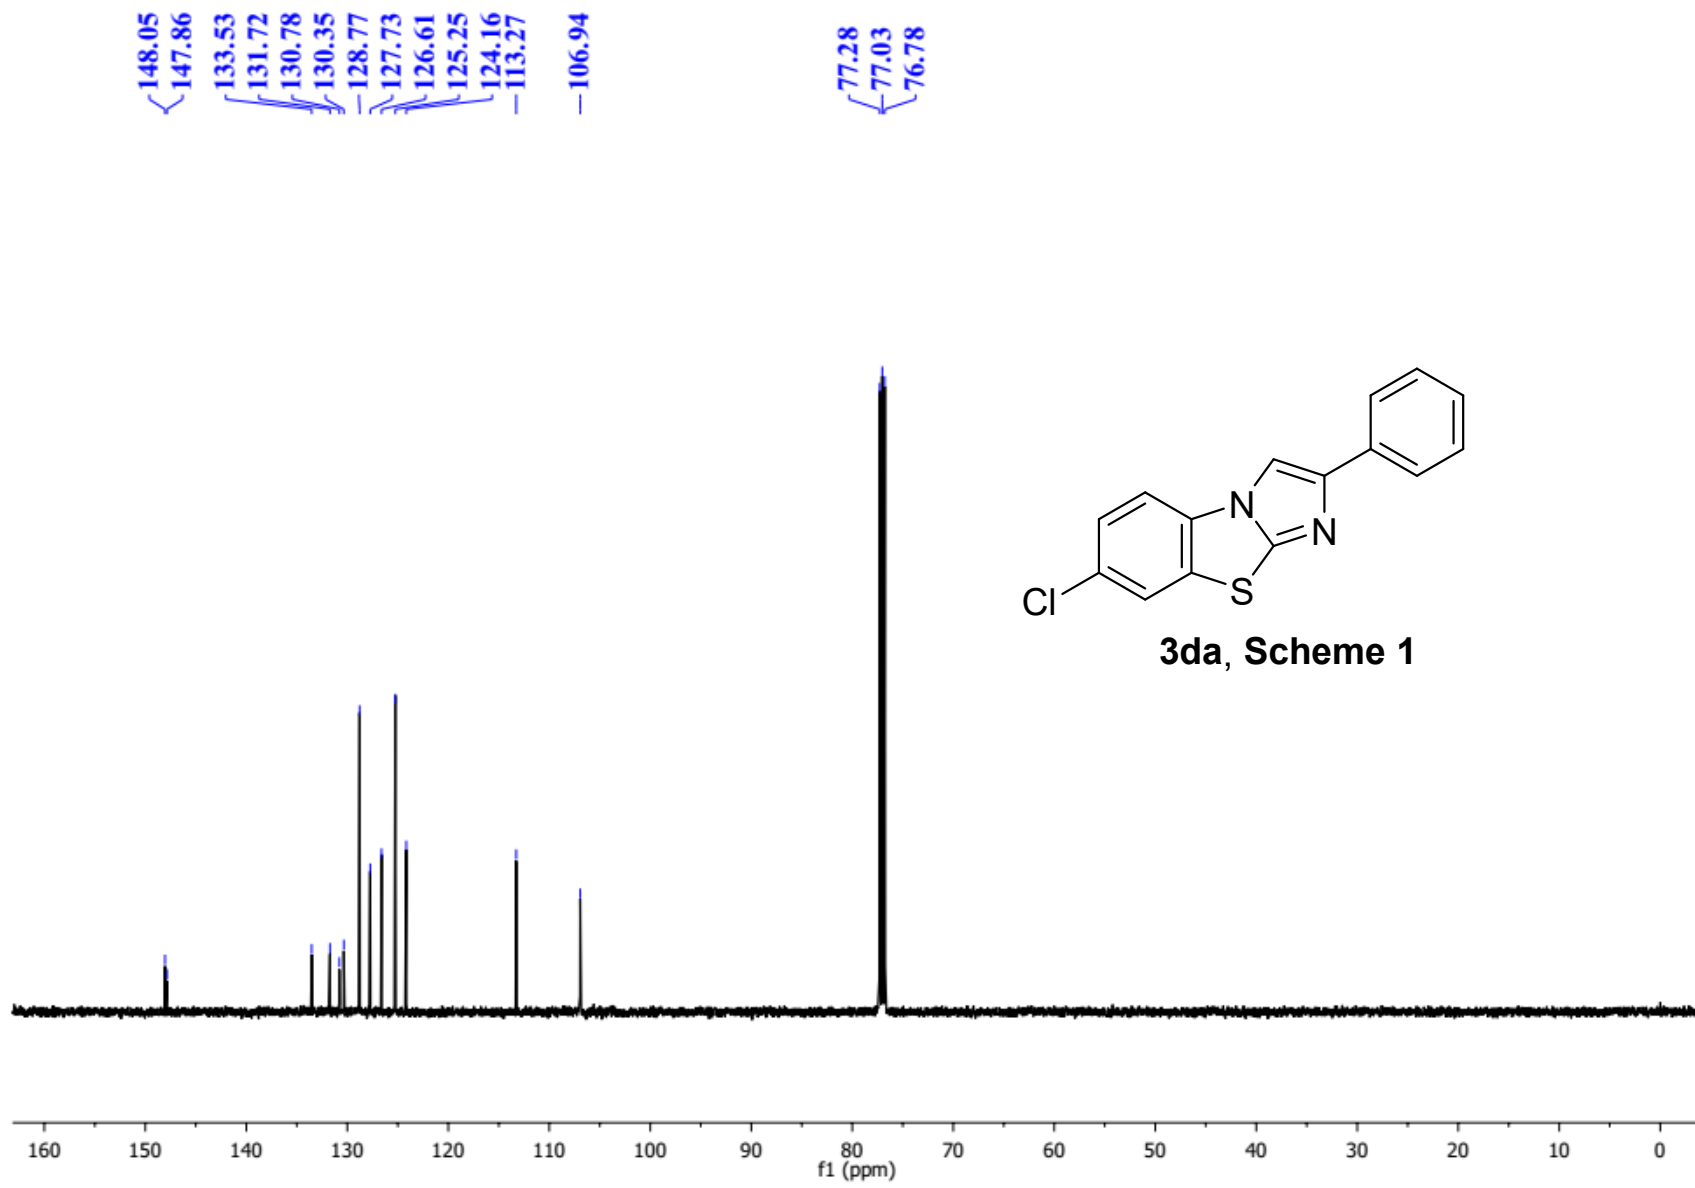

7.92  
7.86  
7.86  
7.85  
7.55  
7.54  
7.54  
7.53  
7.43  
7.43  
7.42  
7.41  
7.40  
7.31  
7.31  
7.31  
7.30  
7.29  
7.29  
7.29  
7.26  
7.19  
7.18  
7.17  
7.17  
7.16  
7.16

-0.00

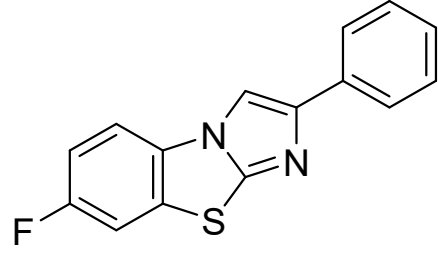

3ea, Scheme 1

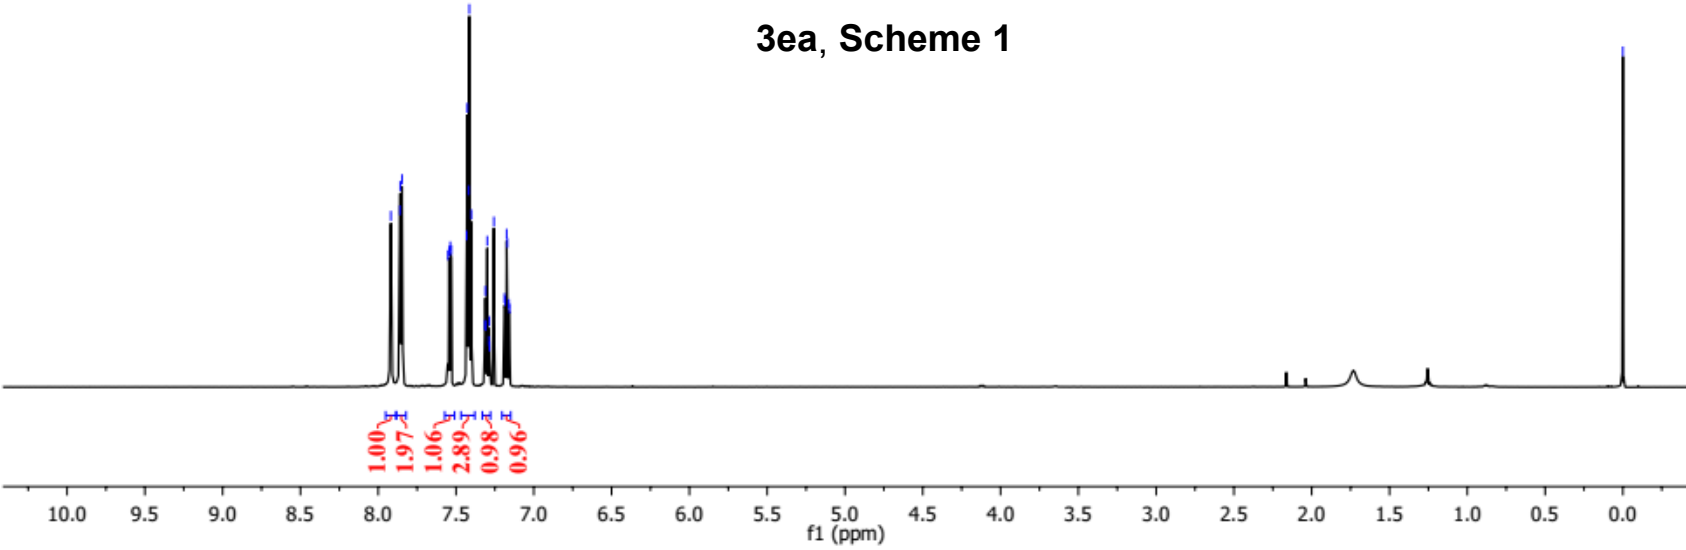

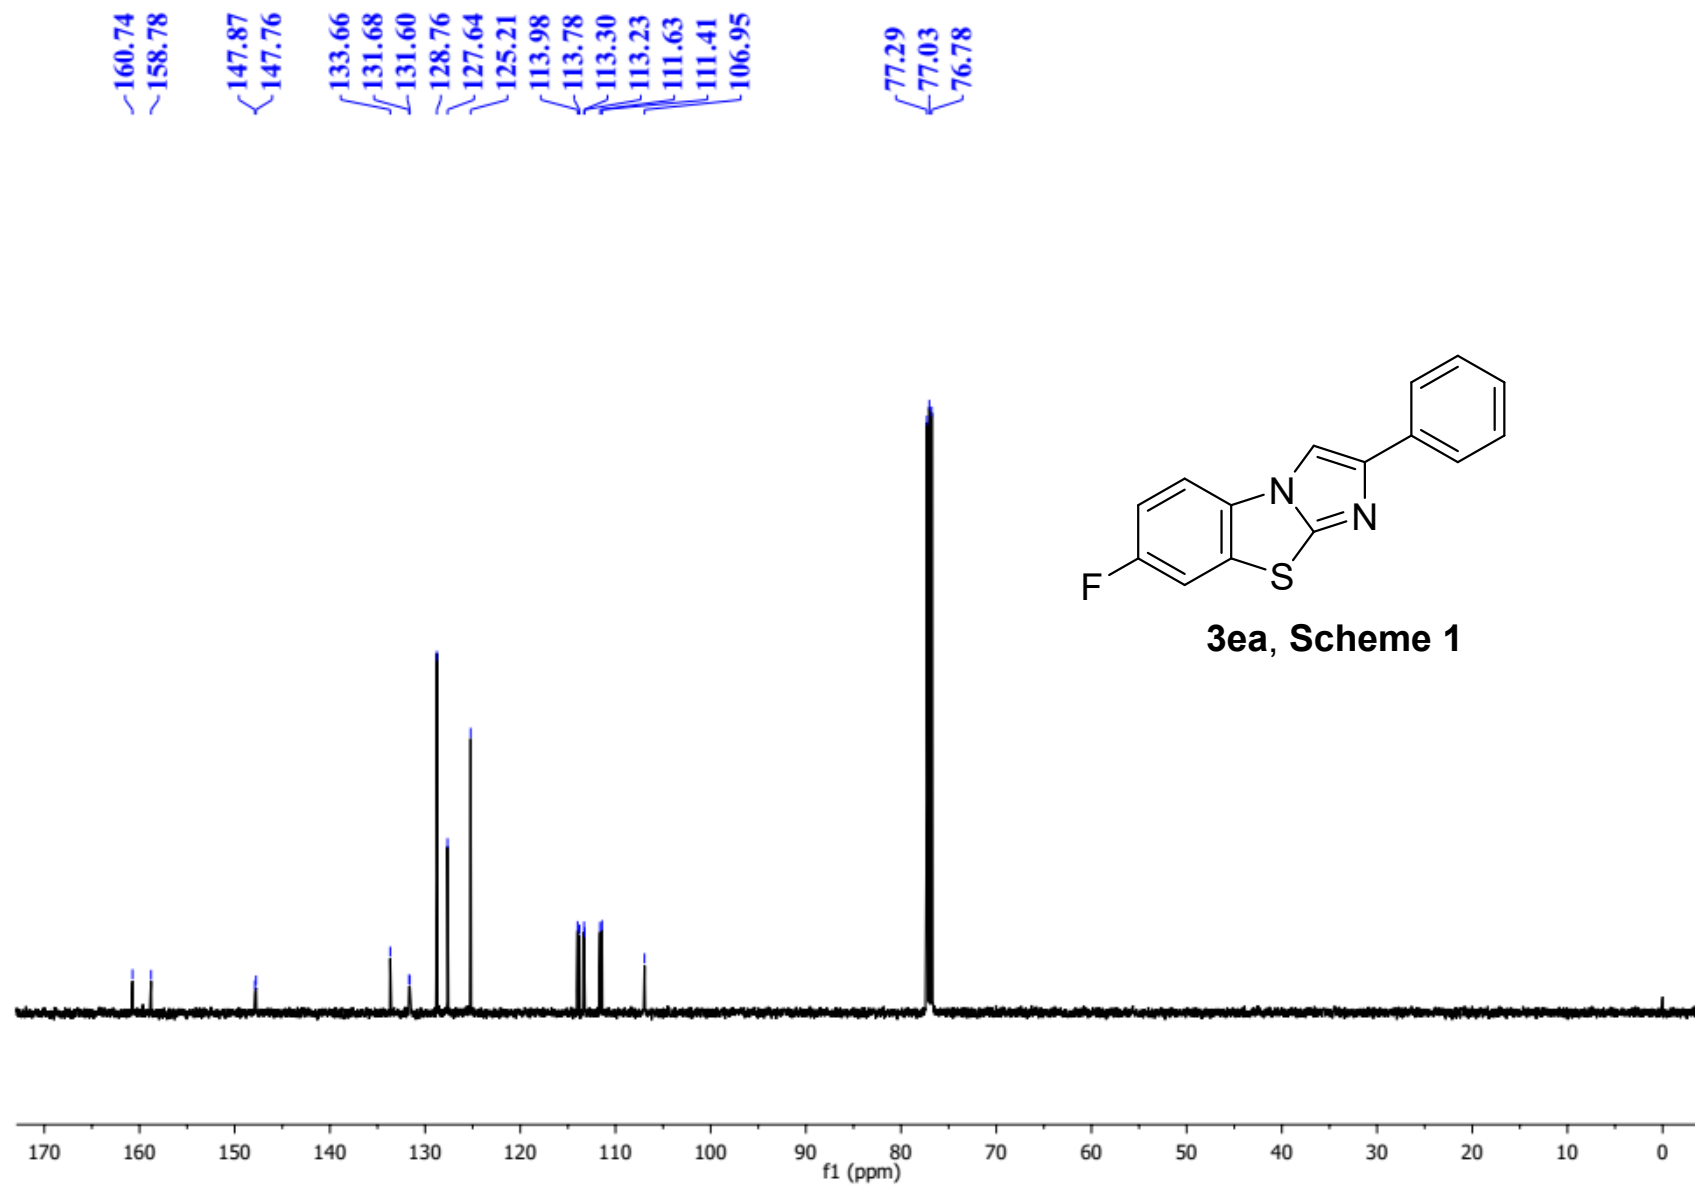

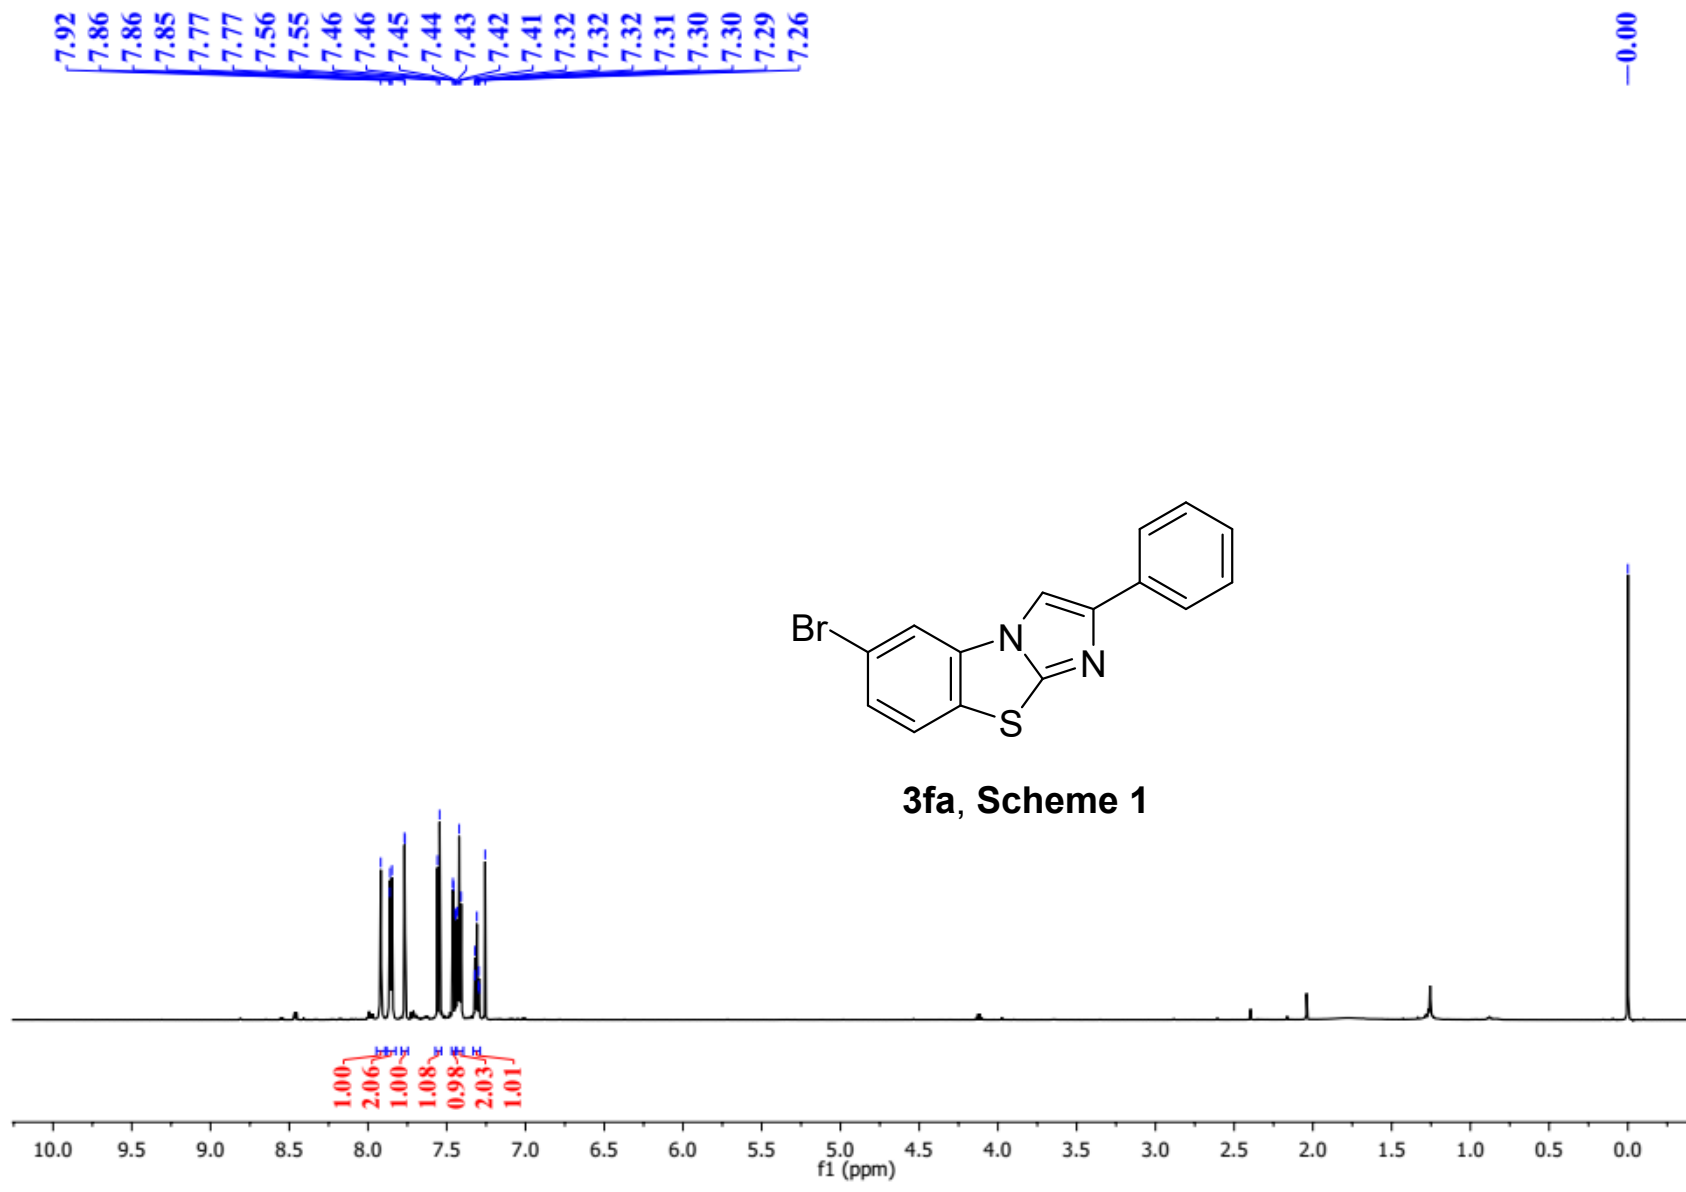

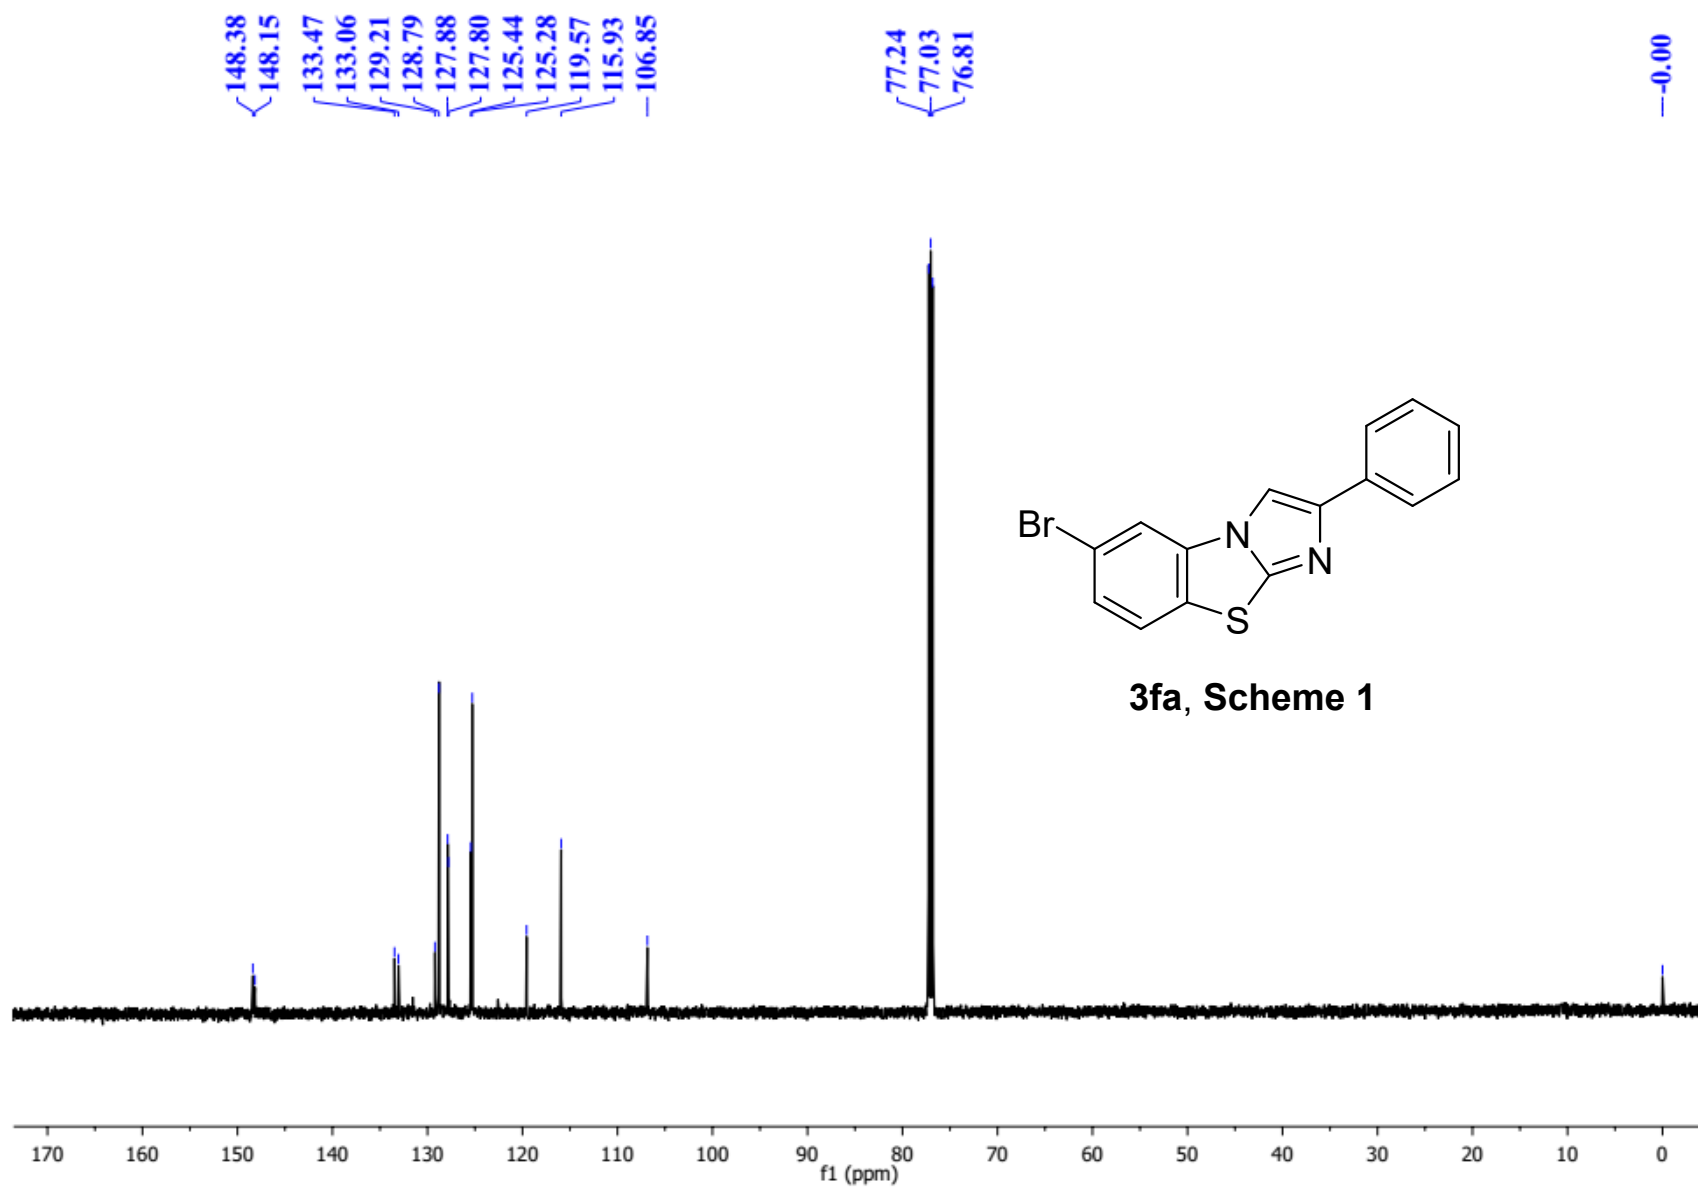

148.38  
148.15  
133.47  
133.06  
129.21  
128.79  
127.88  
127.80  
125.44  
125.28  
119.57  
115.93  
106.85

77.24  
77.03  
76.81

-0.00

3fa, Scheme 1

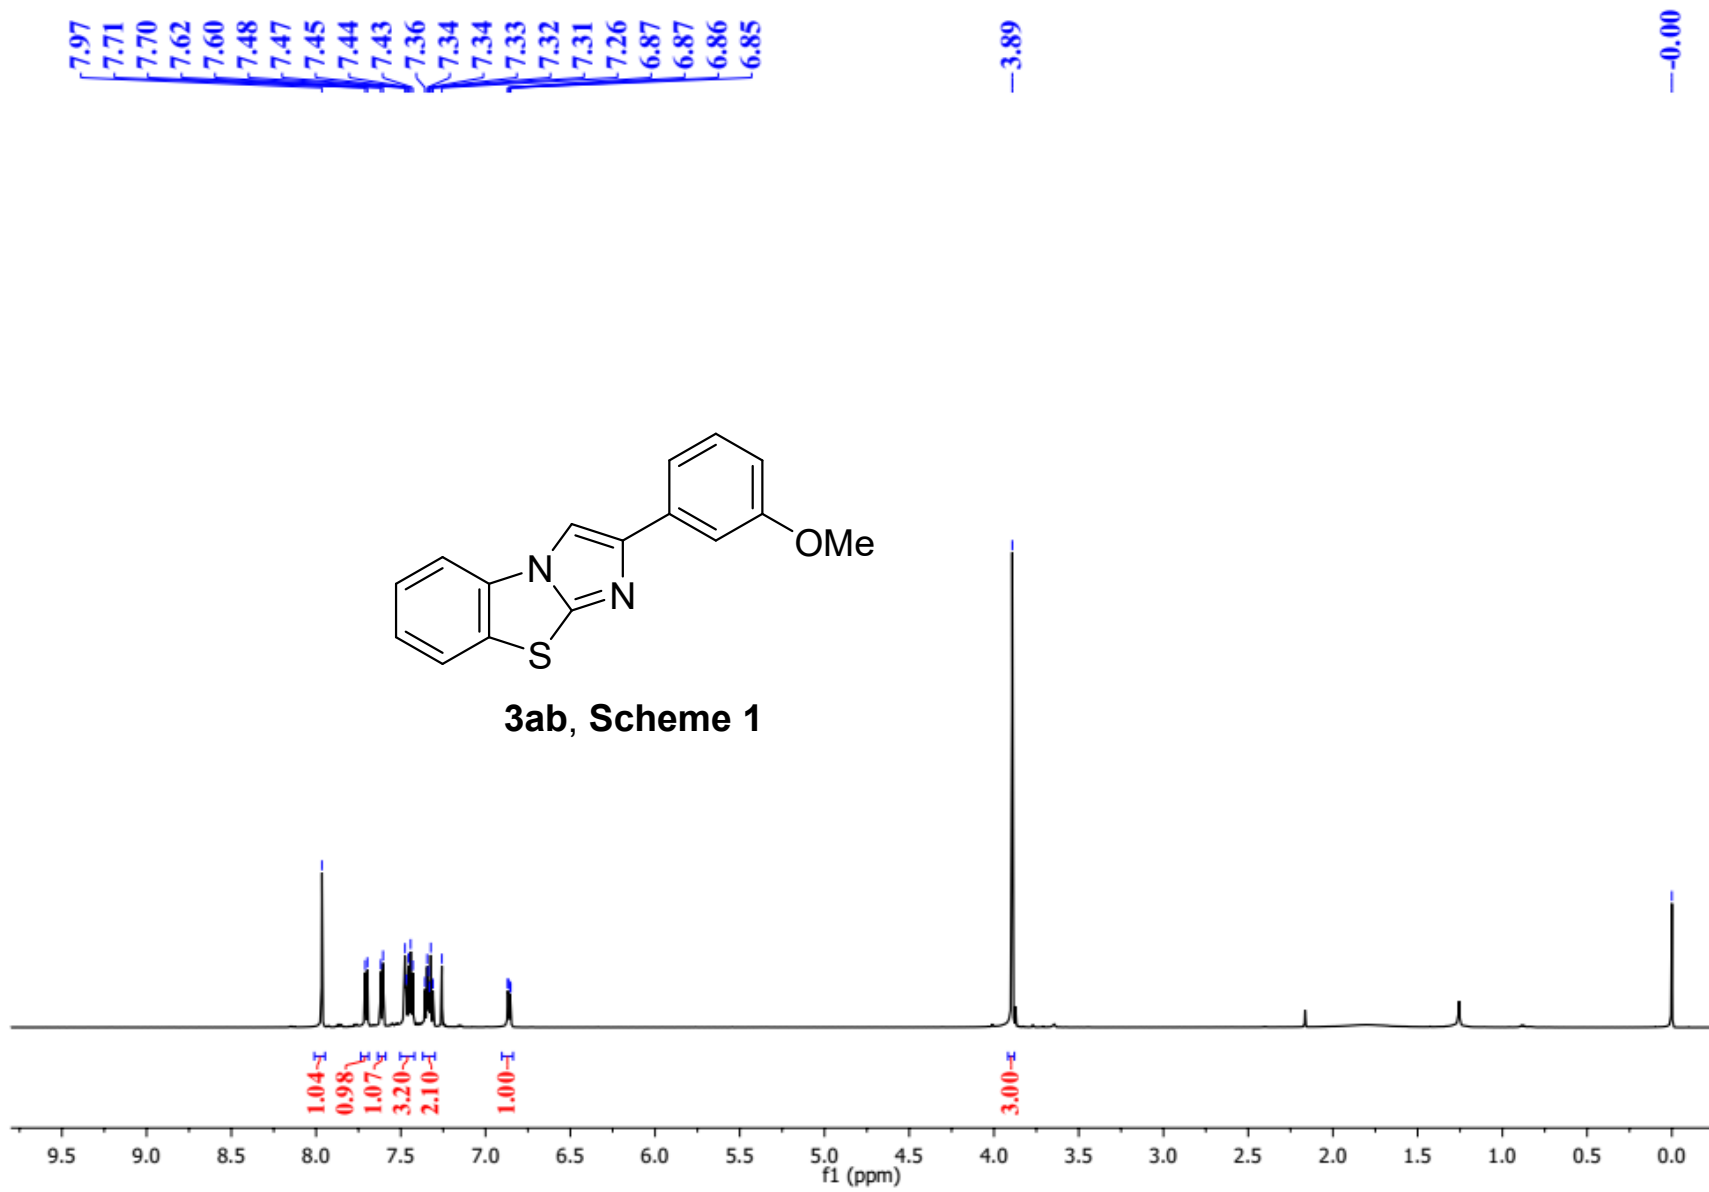

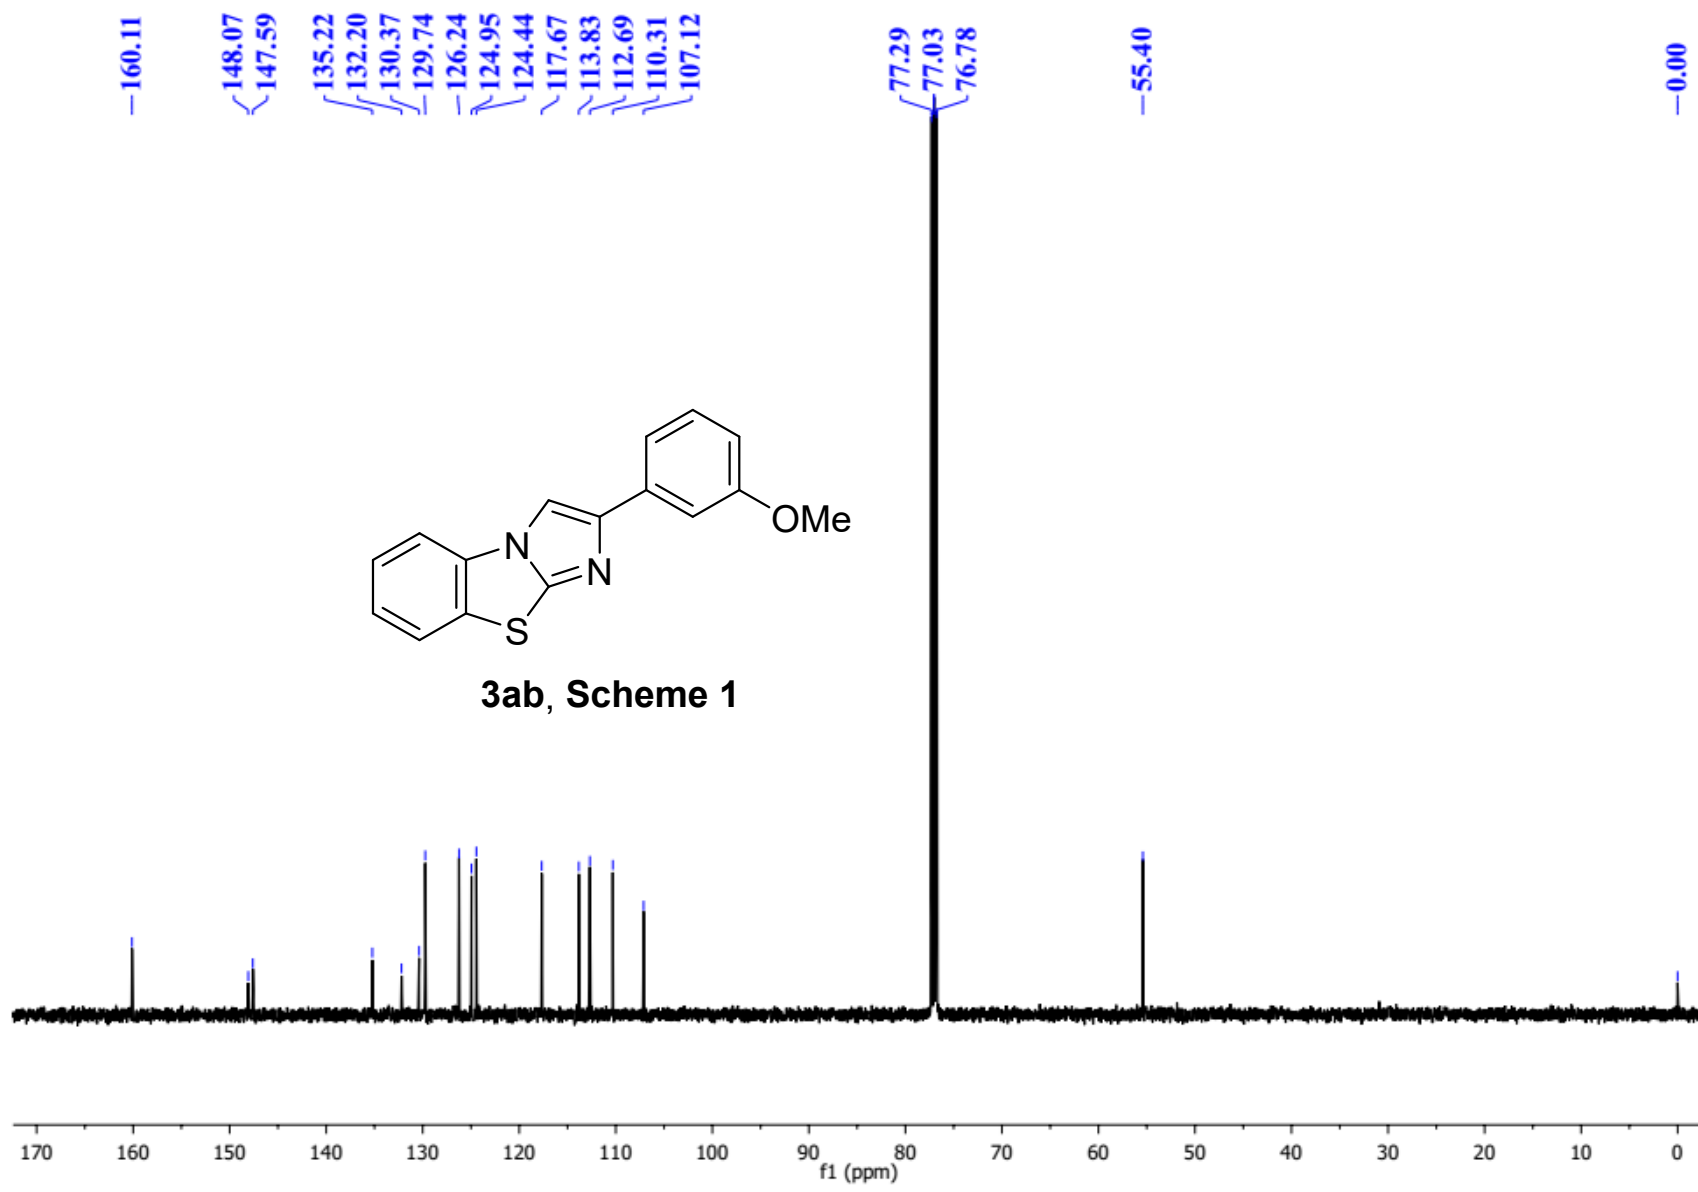



7.96  
7.87  
7.87  
7.87  
7.75  
7.75  
7.74  
7.74  
7.73  
7.73  
7.71  
7.71  
7.70  
7.70  
7.61  
7.60  
7.47  
7.47  
7.46  
7.46  
7.45  
7.45  
7.37  
7.36  
7.35  
7.35  
7.34  
7.34  
7.33  
7.32  
7.26  
7.26  
7.26  
7.25  
7.25  
7.25  
7.24

—0.00

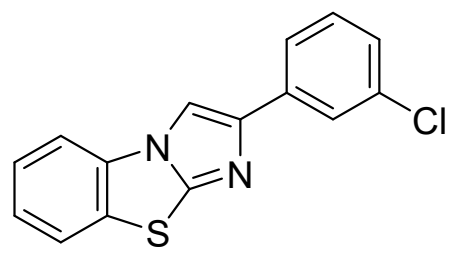

**3ac, Scheme 1**

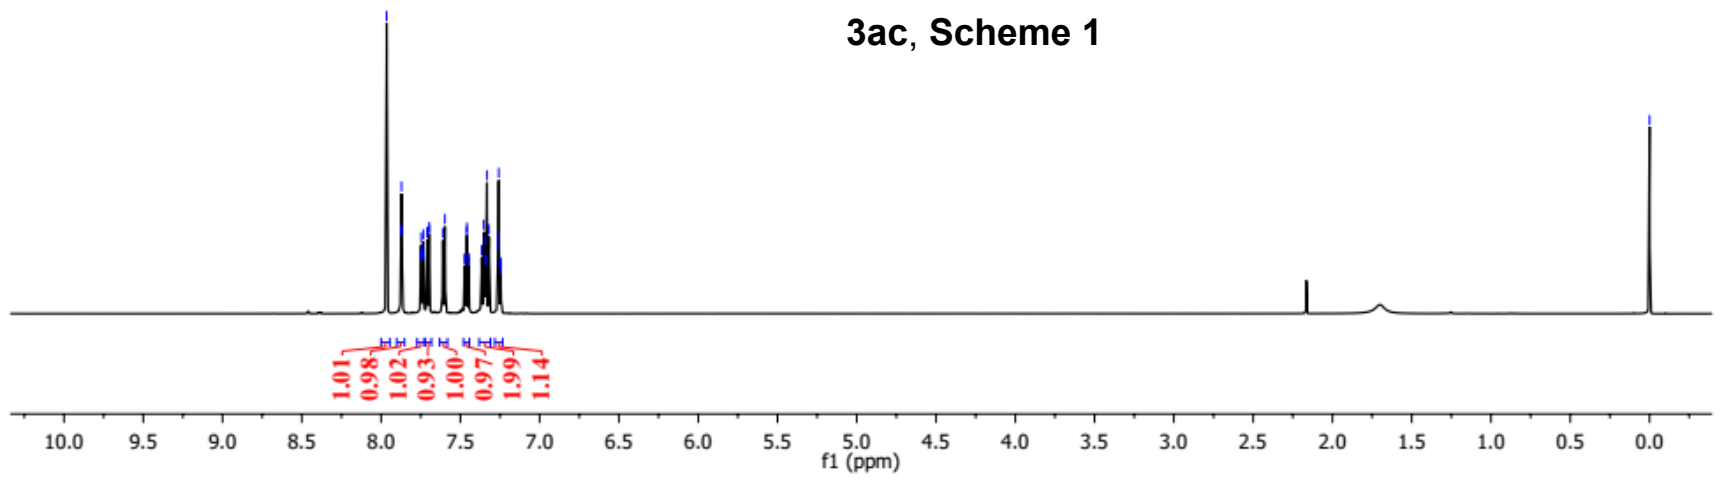

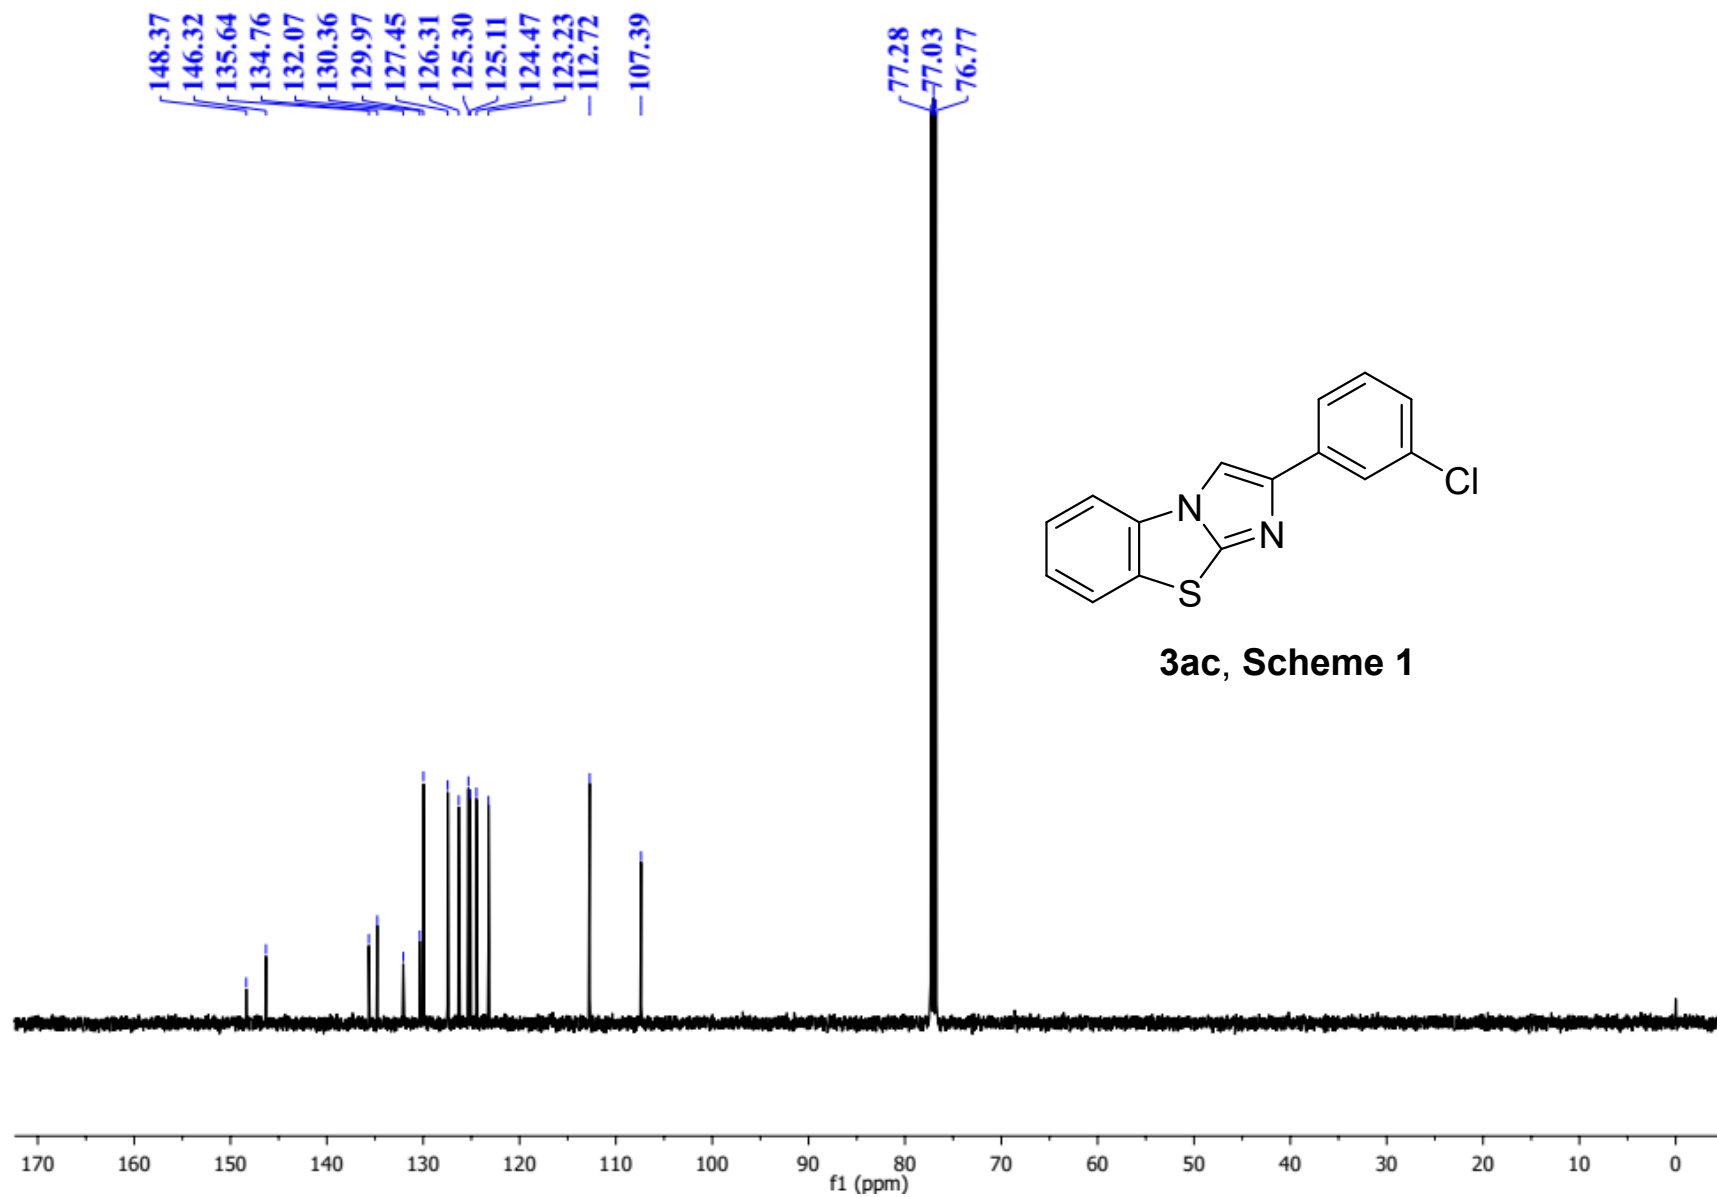

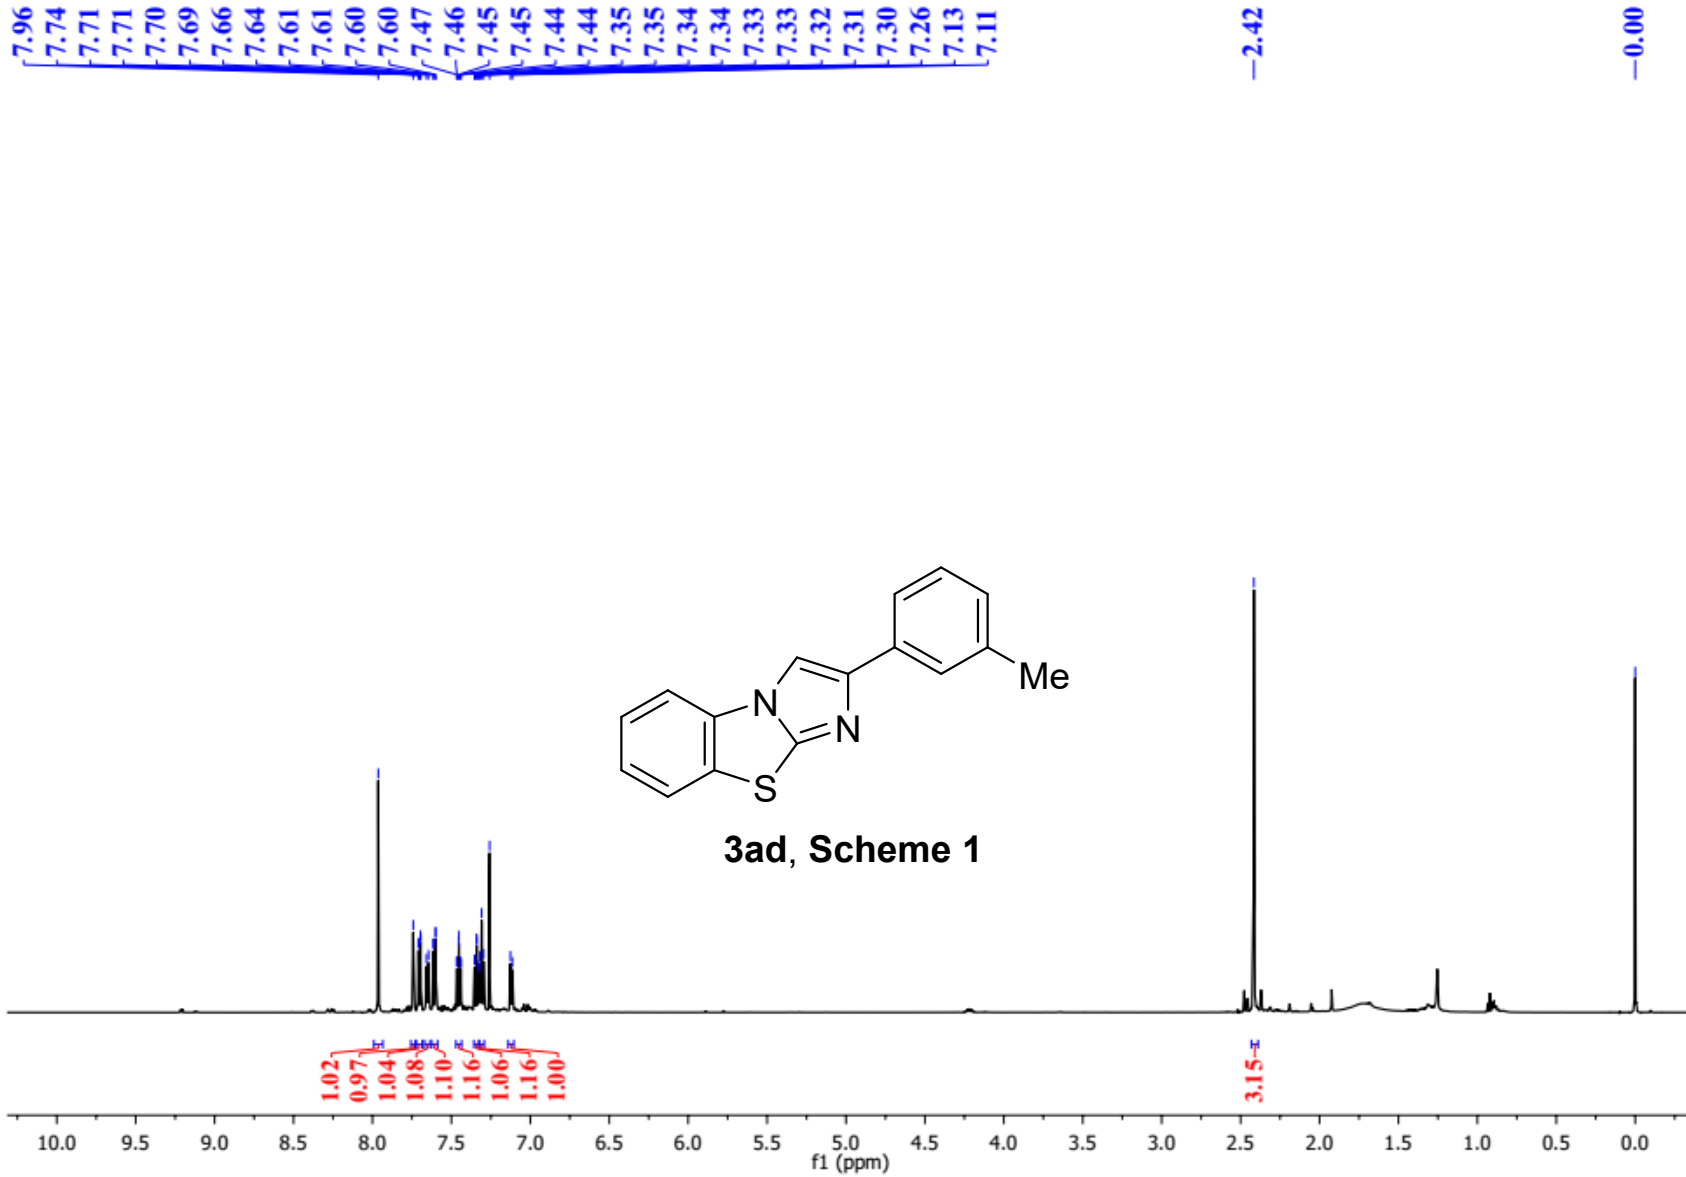

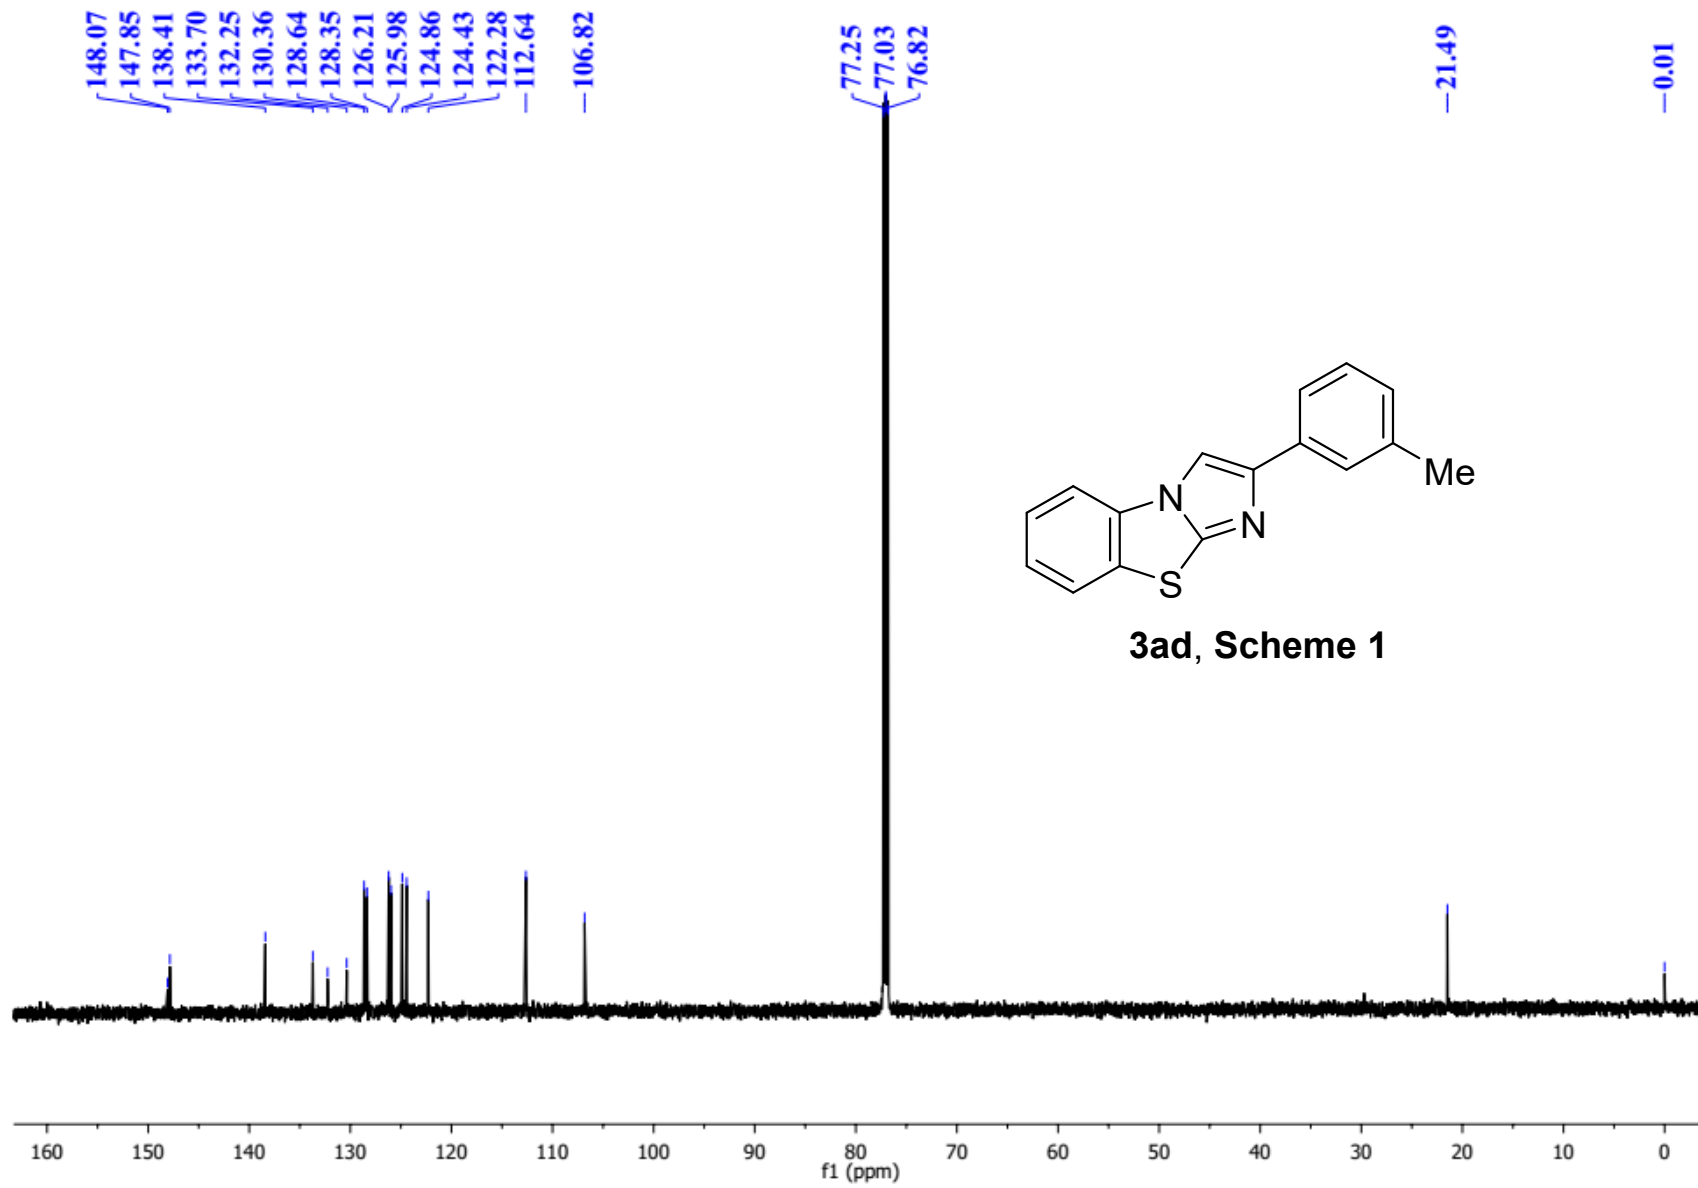

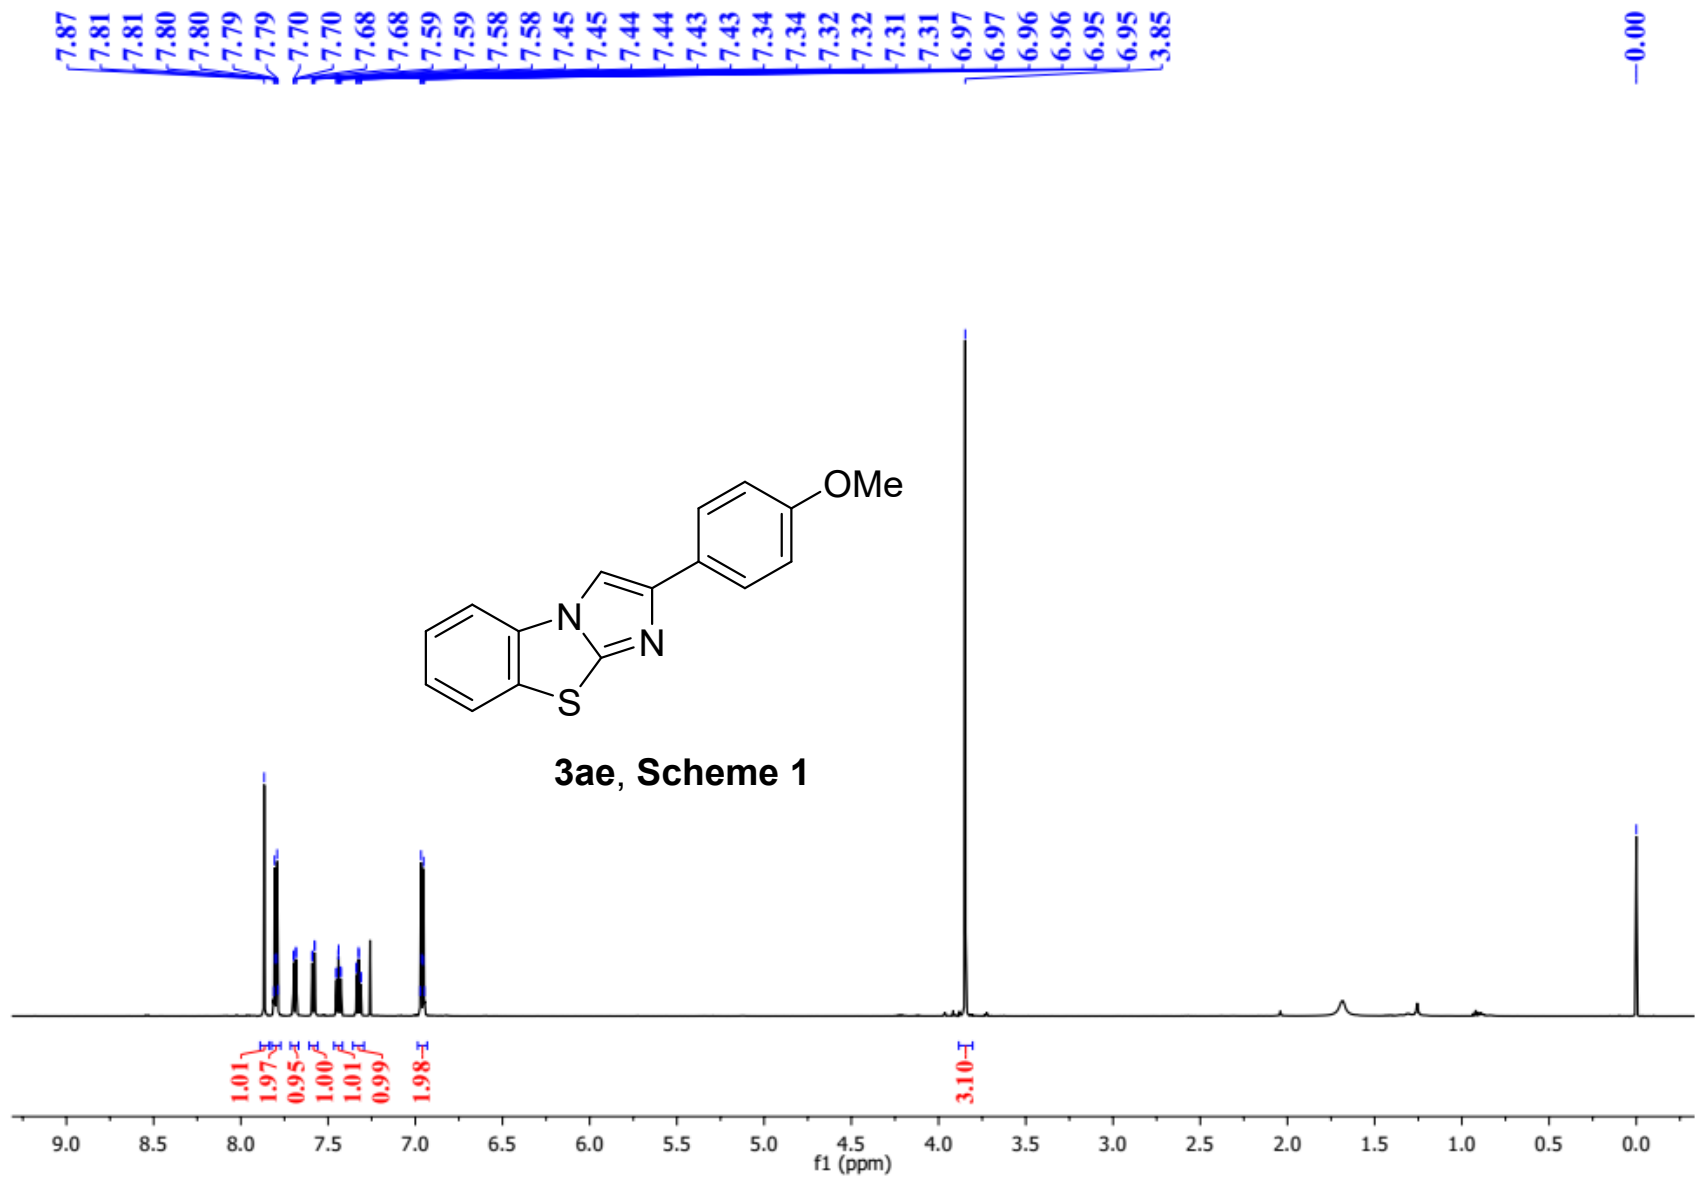

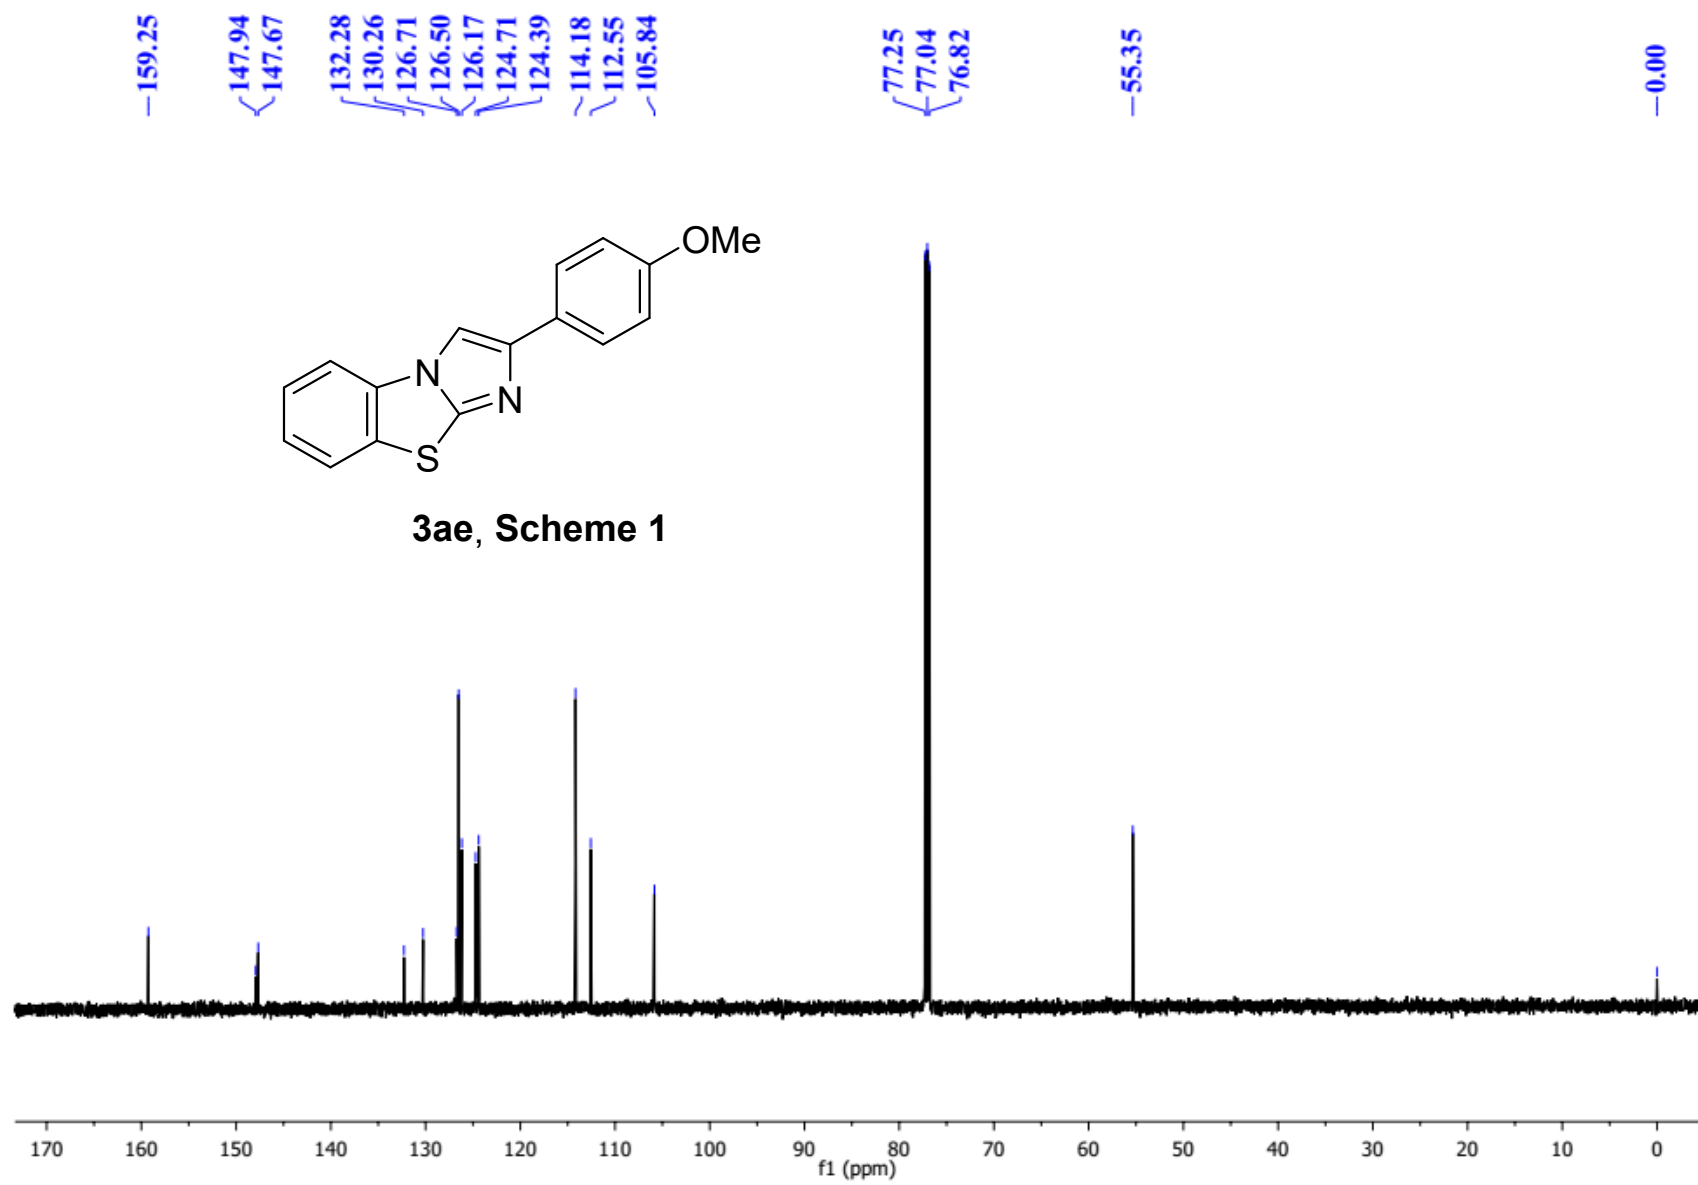

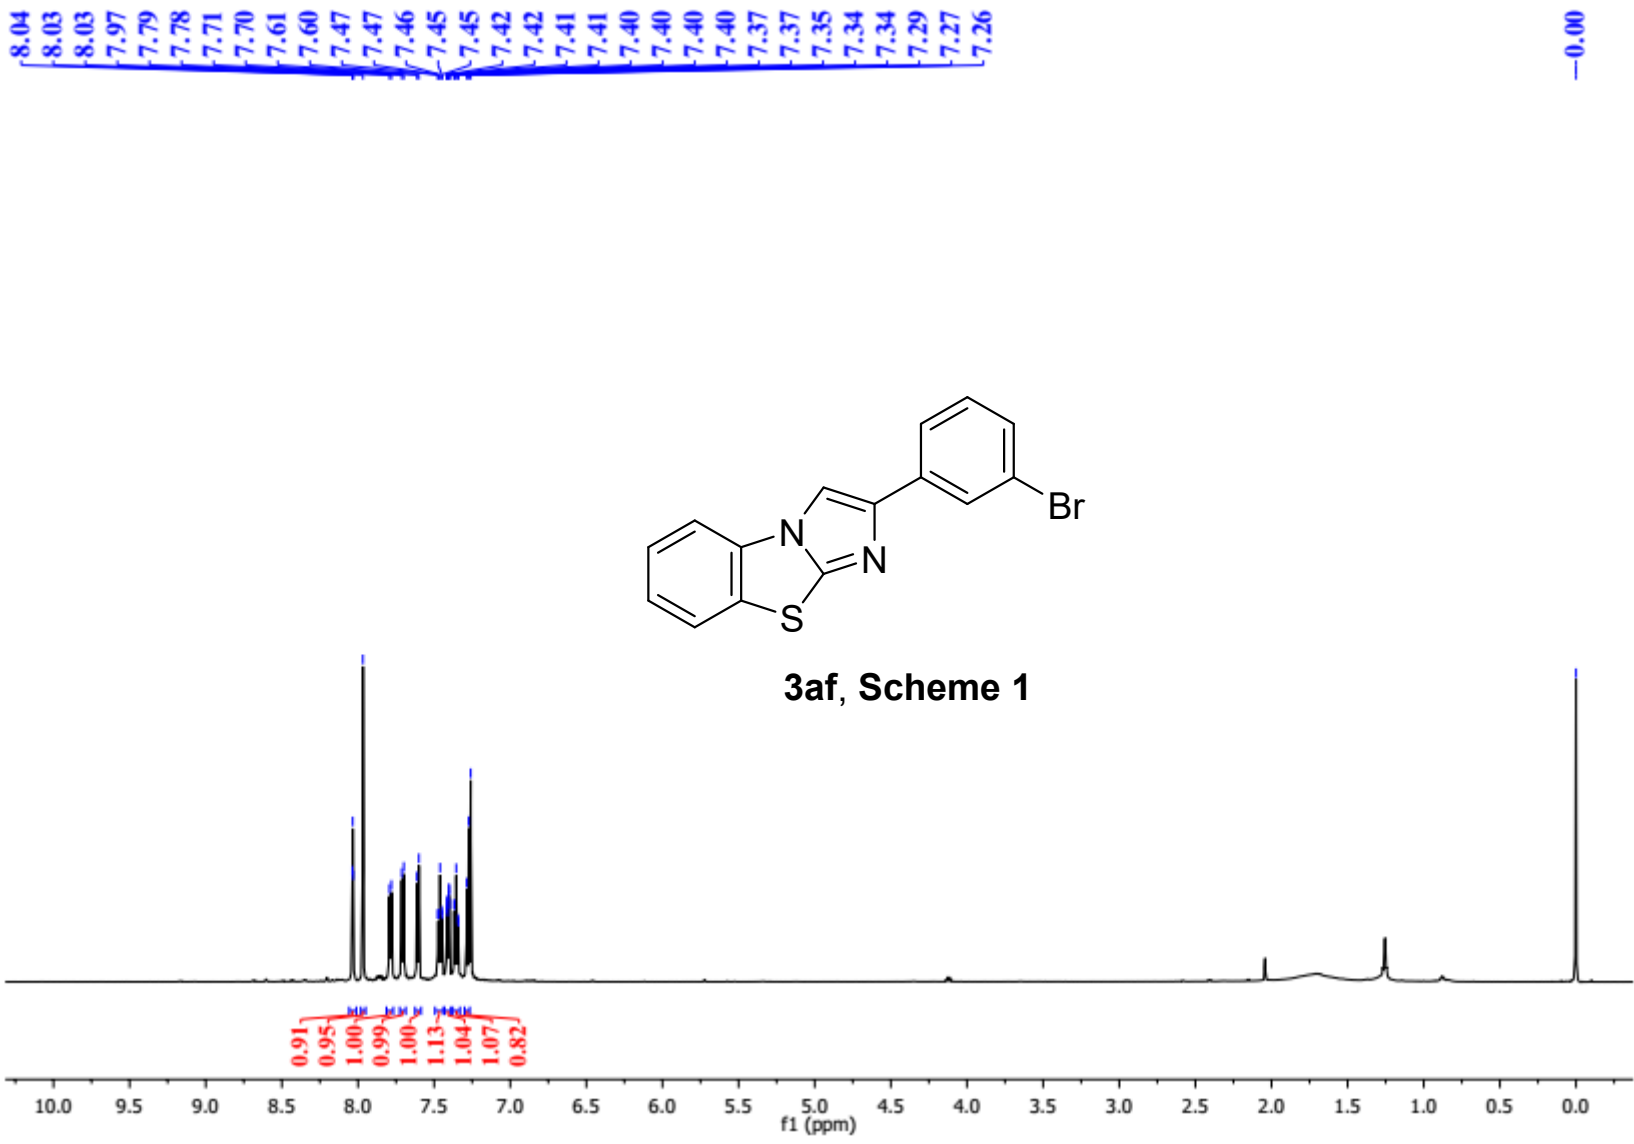

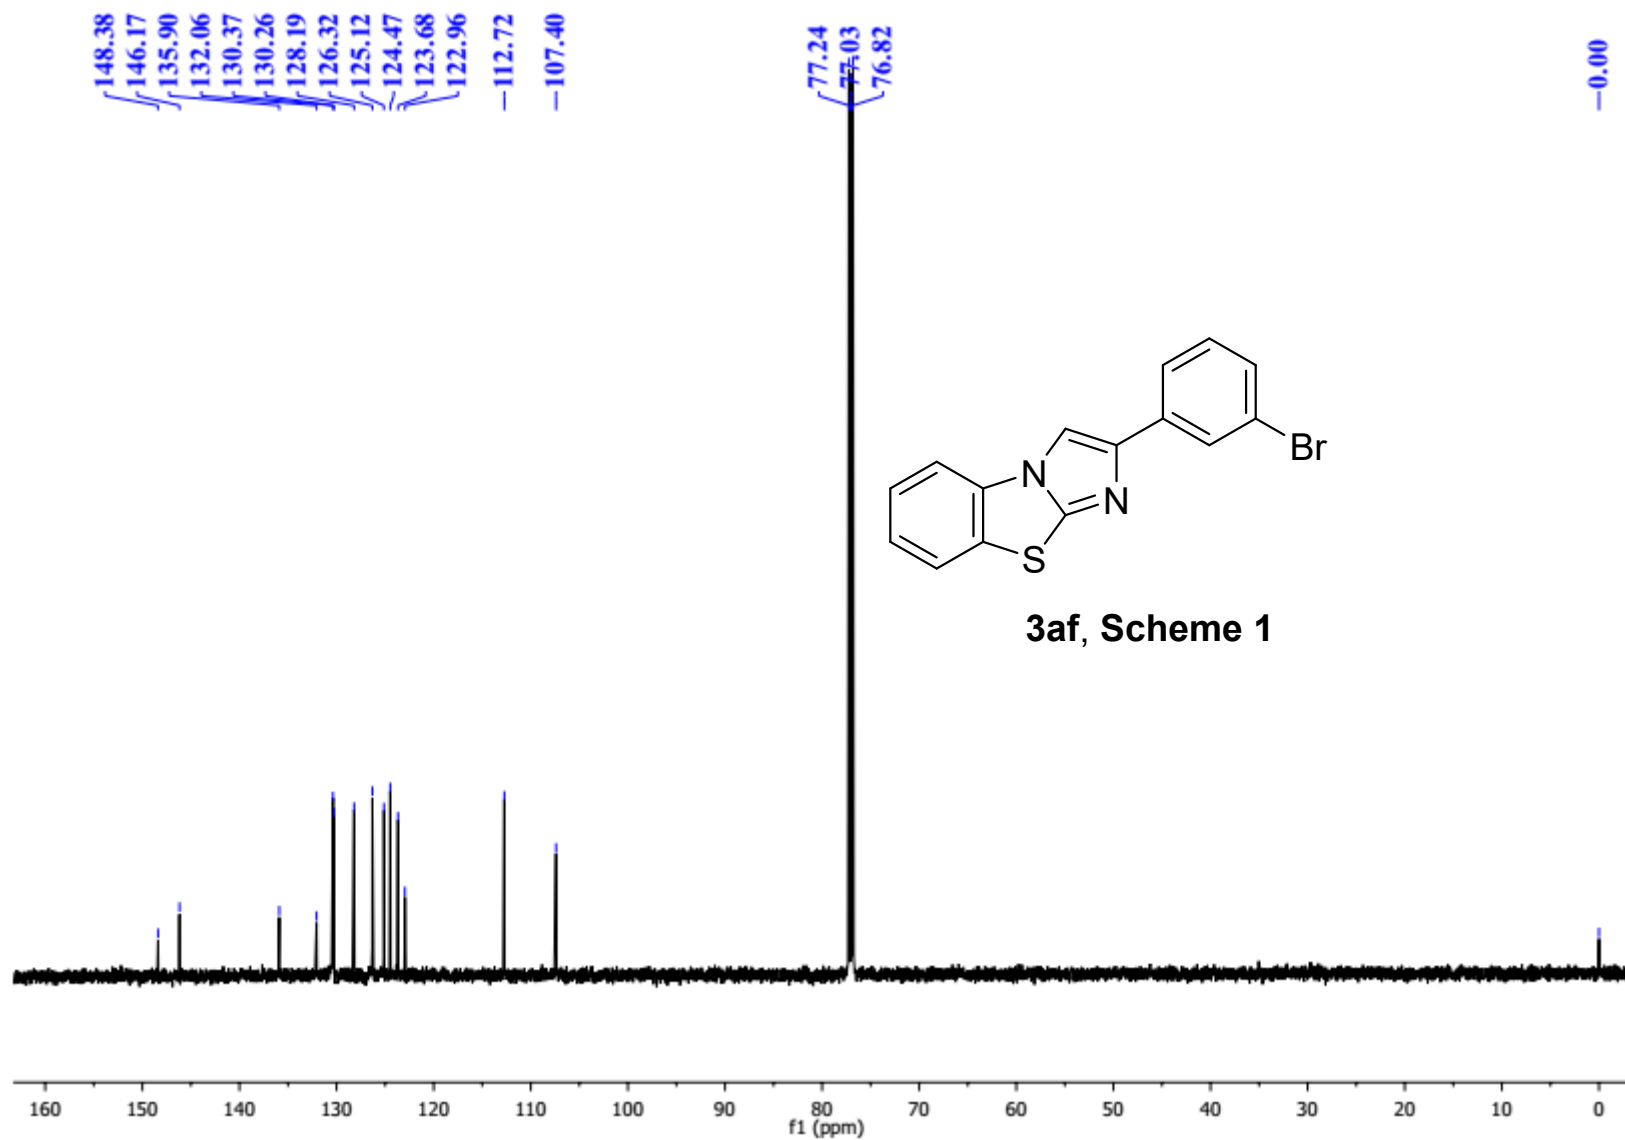



7.91  
7.85  
7.84  
7.84  
7.83  
7.83  
7.82  
7.71  
7.70  
7.61  
7.60  
7.47  
7.47  
7.46  
7.46  
7.45  
7.44  
7.36  
7.36  
7.35  
7.35  
7.34  
7.34  
7.26  
7.13  
7.12  
7.12  
7.11  
7.11  
7.10  
7.10  
7.09  
7.09

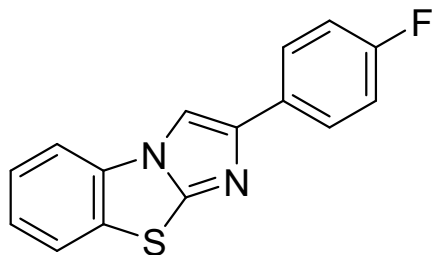

3ag, Scheme 1

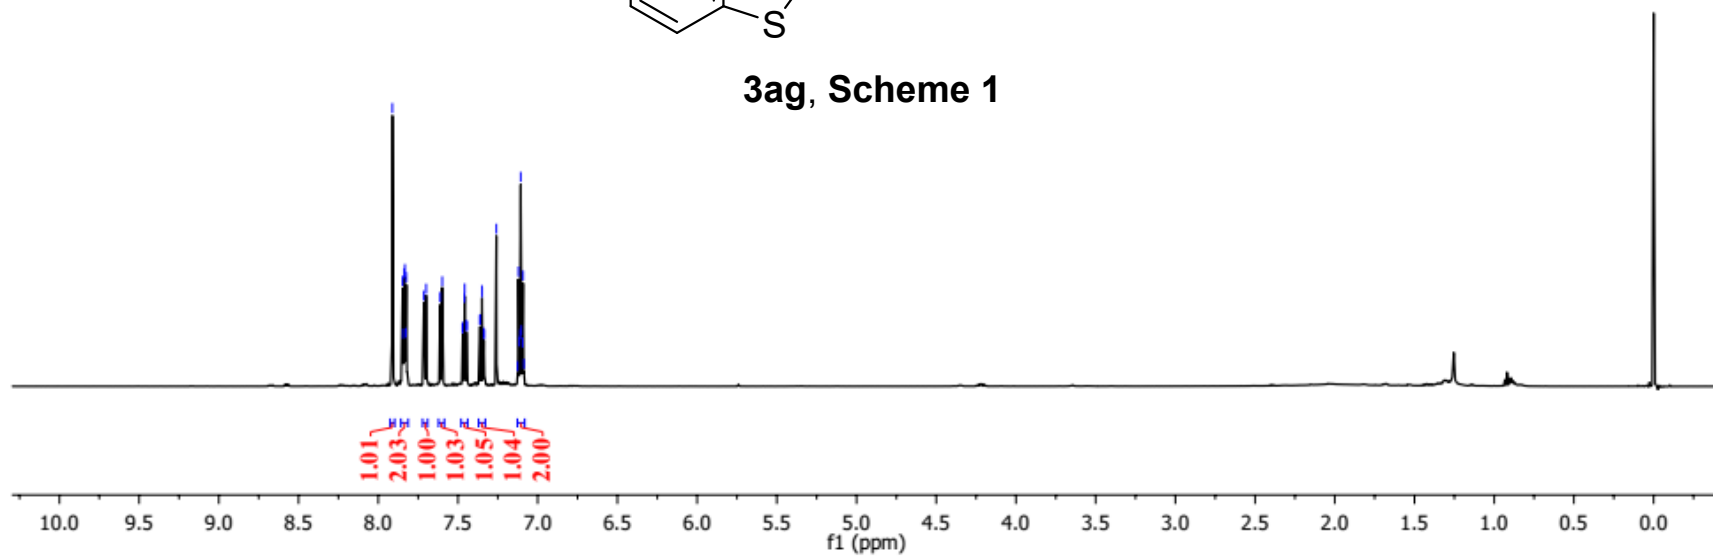

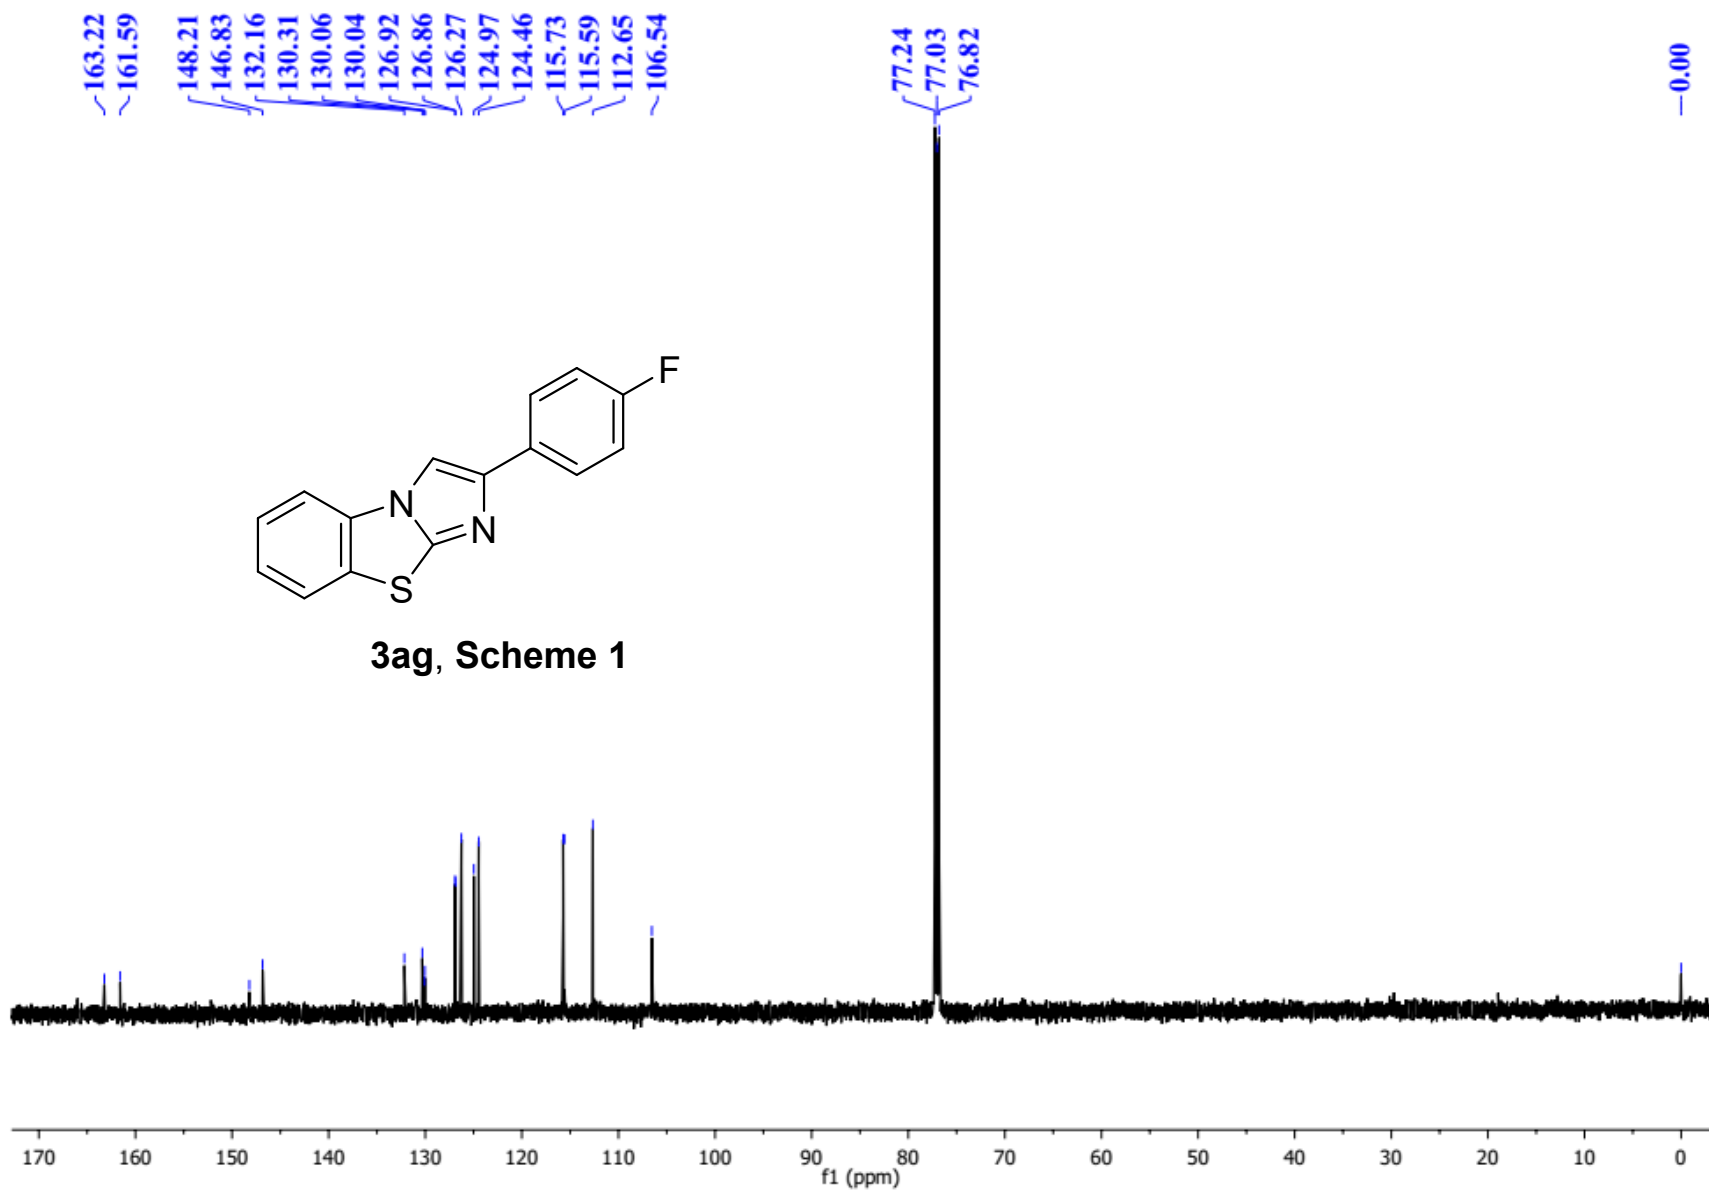

8.04  
7.98  
7.97  
7.73  
7.72  
7.71  
7.71  
7.67  
7.65  
7.64  
7.64  
7.62  
7.62  
7.49  
7.49  
7.47  
7.47  
7.46  
7.46  
7.38  
7.38  
7.37  
7.37  
7.36  
7.36  
7.26

-0.00

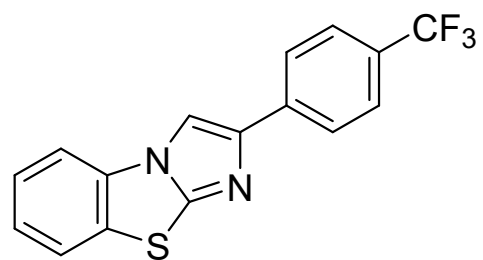

3ah, Scheme 1

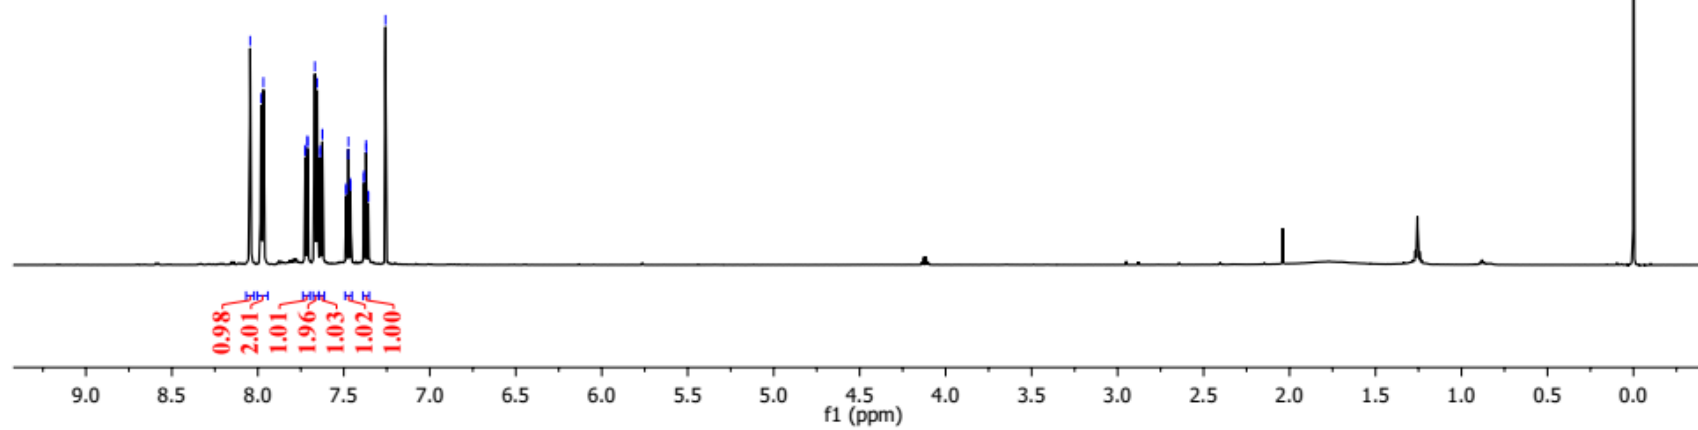

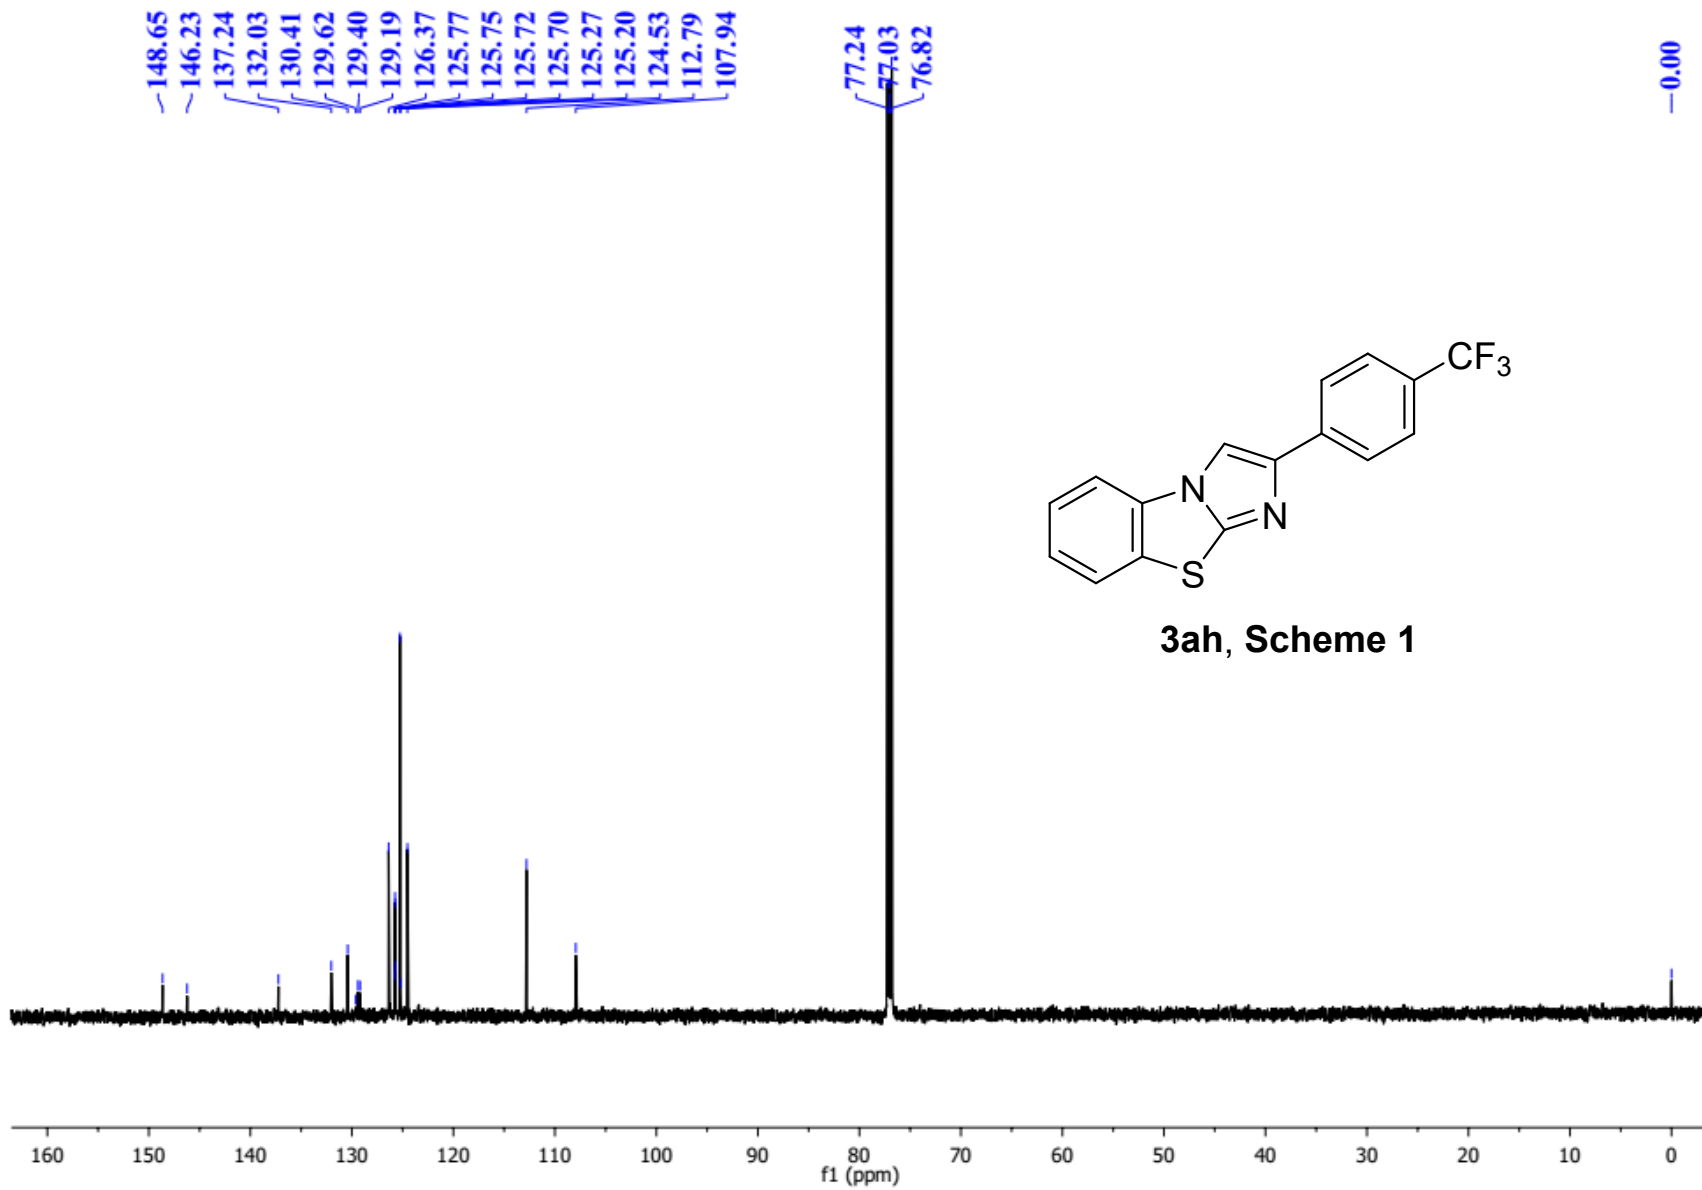

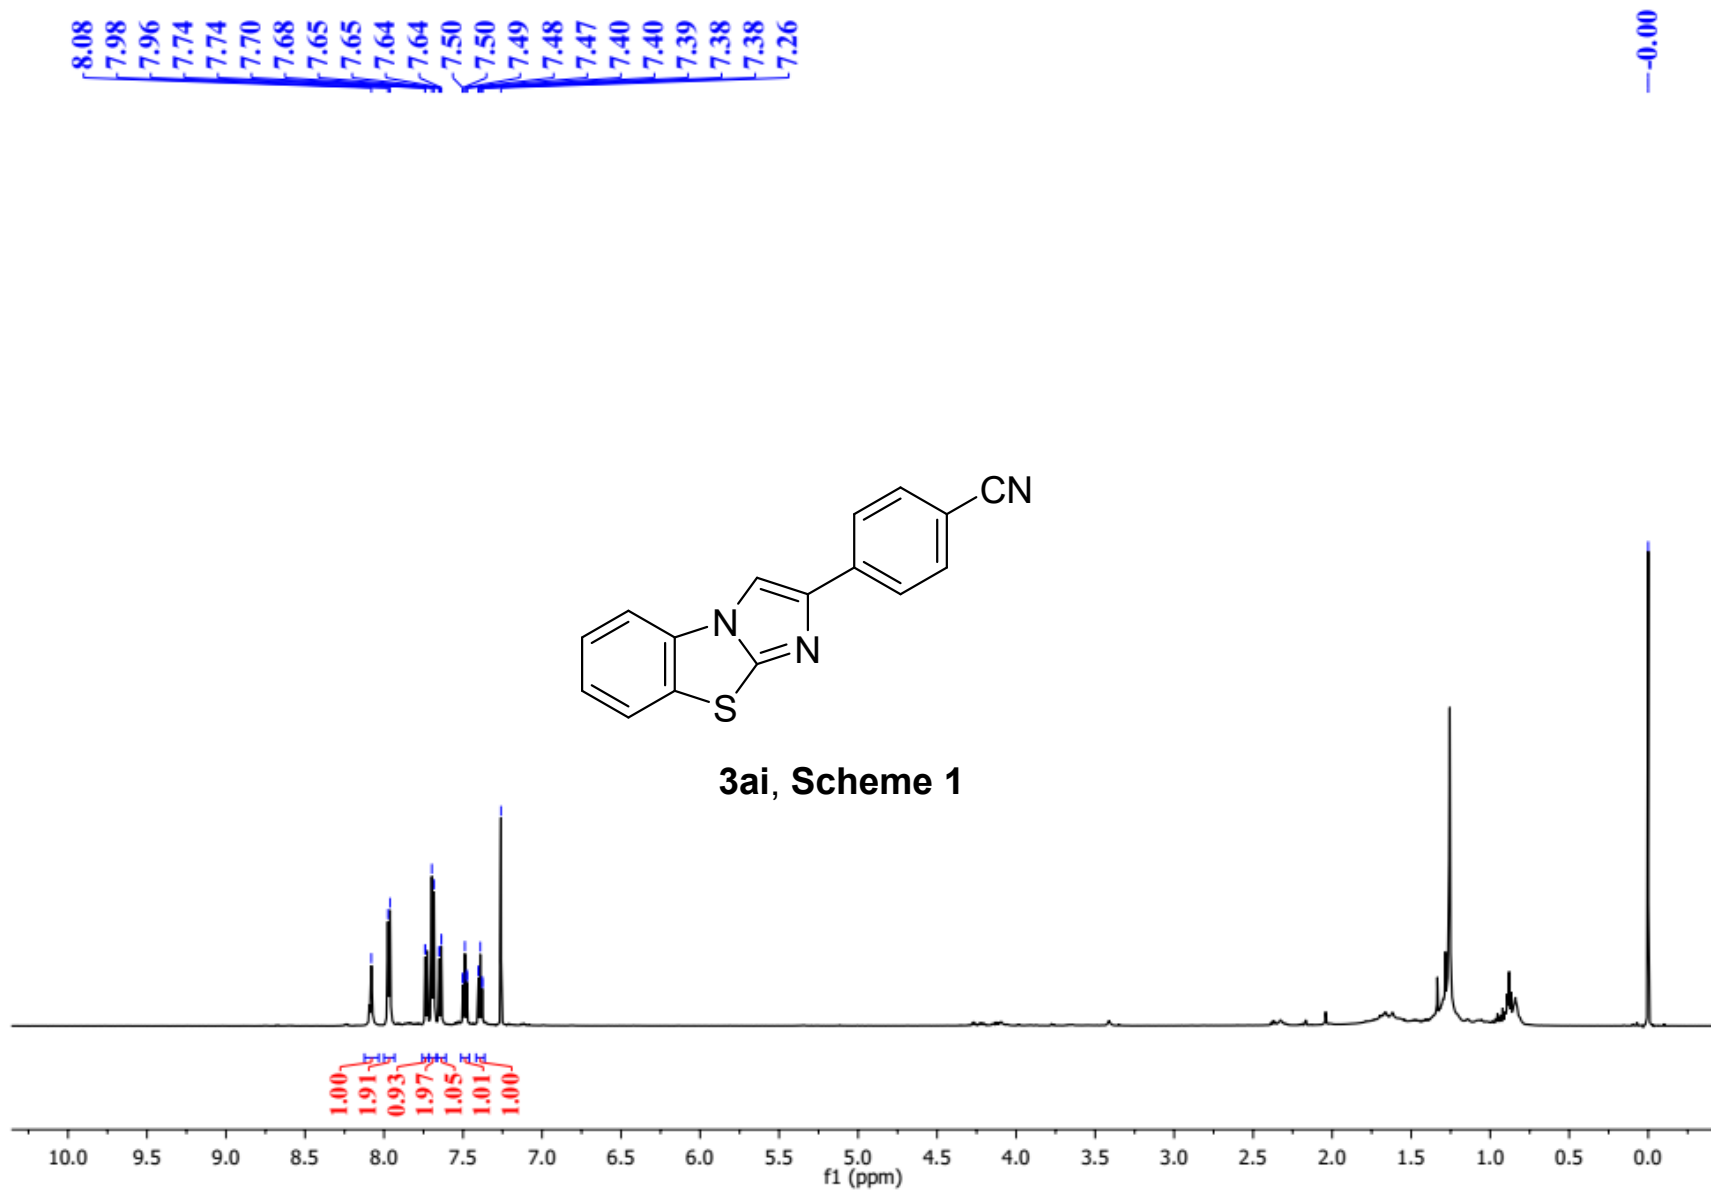

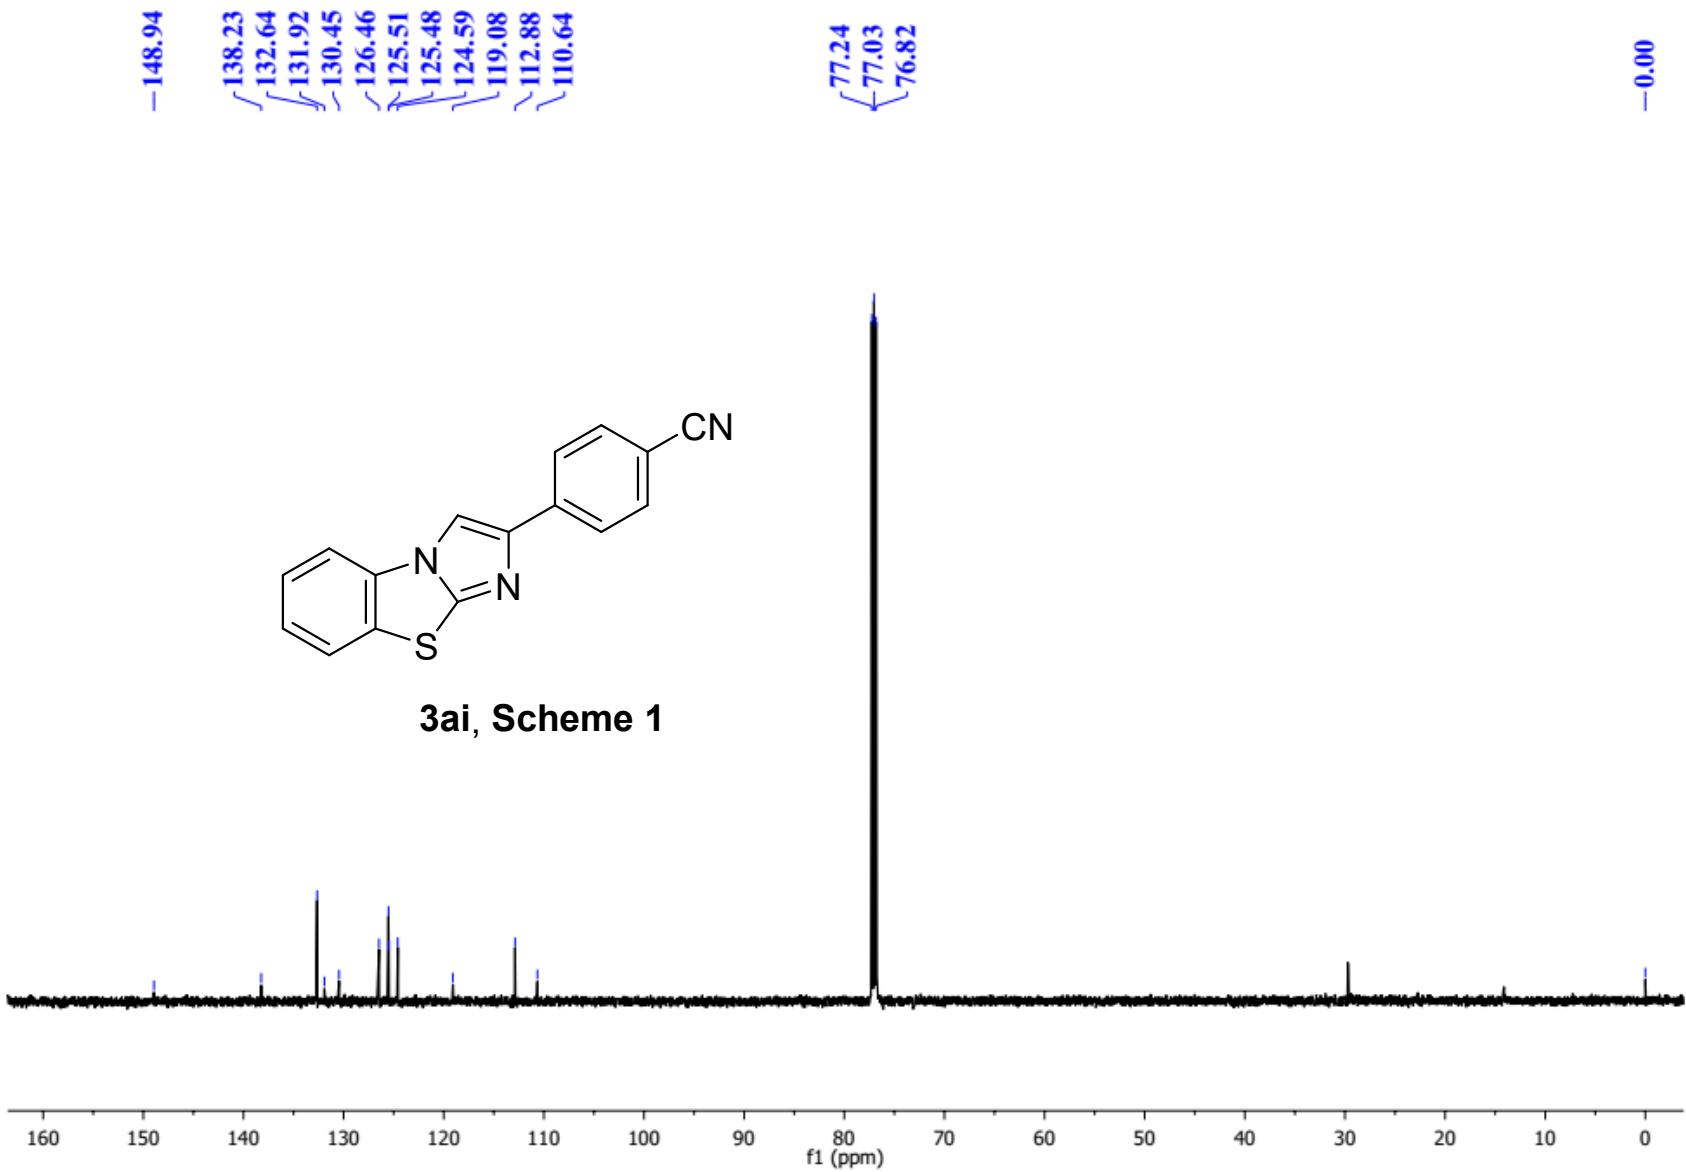

8.59  
8.59  
8.59  
8.59  
8.58  
8.58  
8.58  
8.58  
8.40  
8.07  
8.05  
7.77  
7.77  
7.76  
7.75  
7.74  
7.74  
7.71  
7.71  
7.69  
7.69  
7.64  
7.62  
7.62  
7.47  
7.47  
7.46  
7.45  
7.44  
7.44  
7.37  
7.36  
7.35  
7.35  
7.34  
7.33  
7.27  
7.20  
7.20  
7.19  
7.19  
7.18  
7.18  
7.17  
7.17  
-0.00

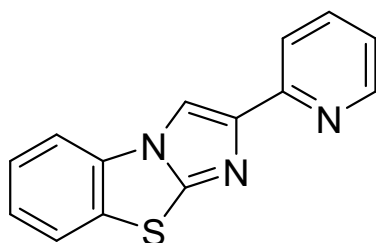

3aj, Scheme 1

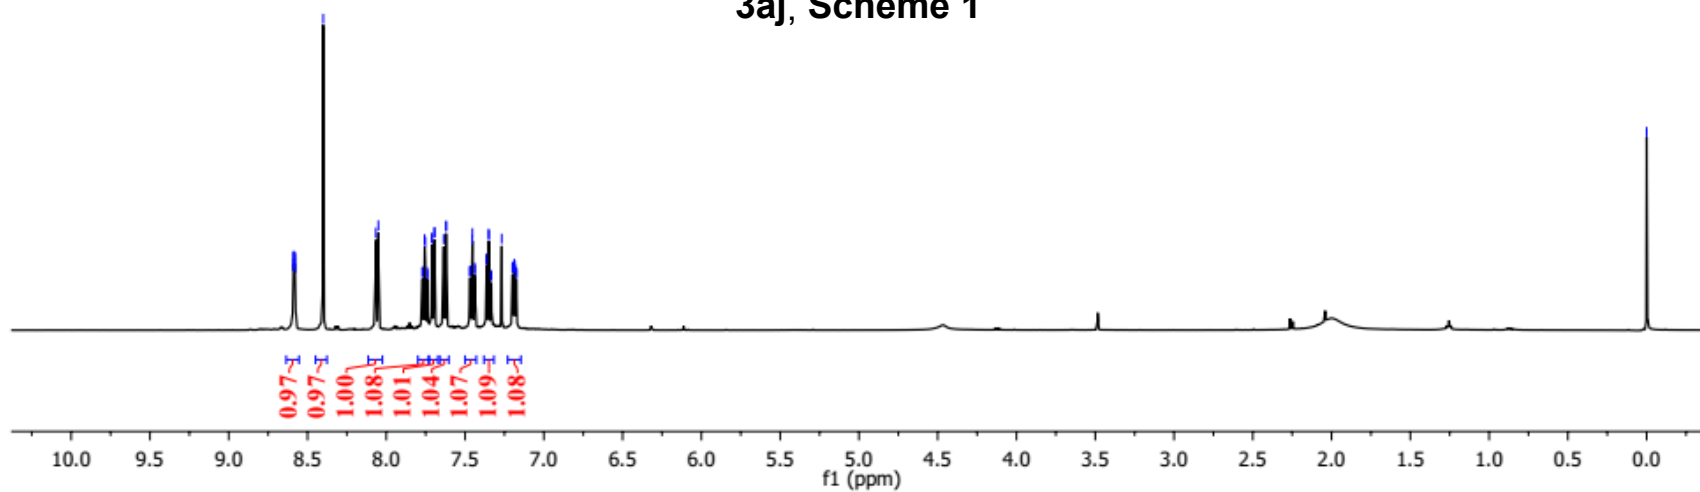

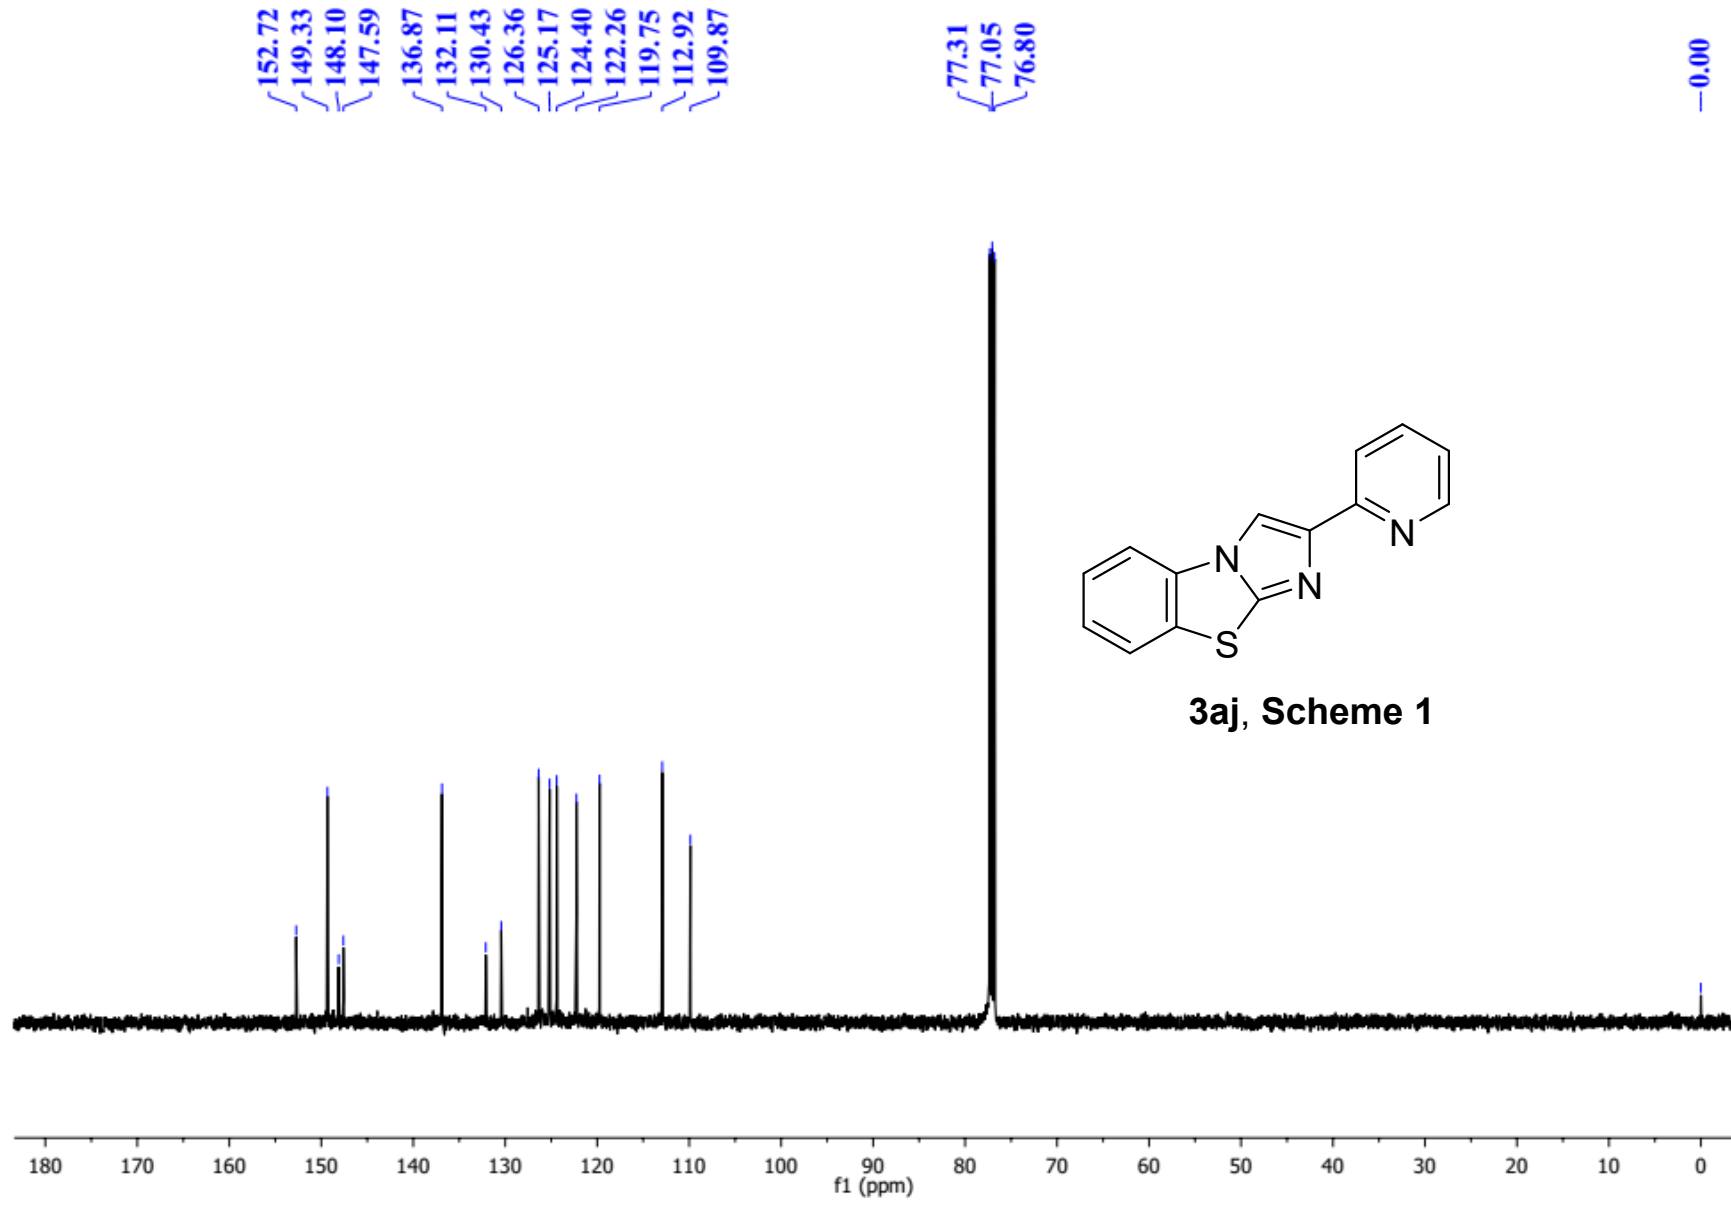



7.85  
7.71  
7.71  
7.70  
7.70  
7.70  
7.70  
7.69  
7.60  
7.60  
7.59  
7.59  
7.59  
7.47  
7.46  
7.46  
7.45  
7.45  
7.45  
7.45  
7.45  
7.44  
7.44  
7.38  
7.37  
7.37  
7.36  
7.35  
7.35  
7.34  
7.34  
7.34  
7.34  
7.33  
7.33

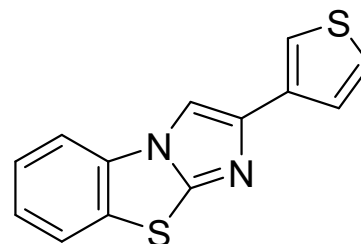

**3ak, Scheme 1**

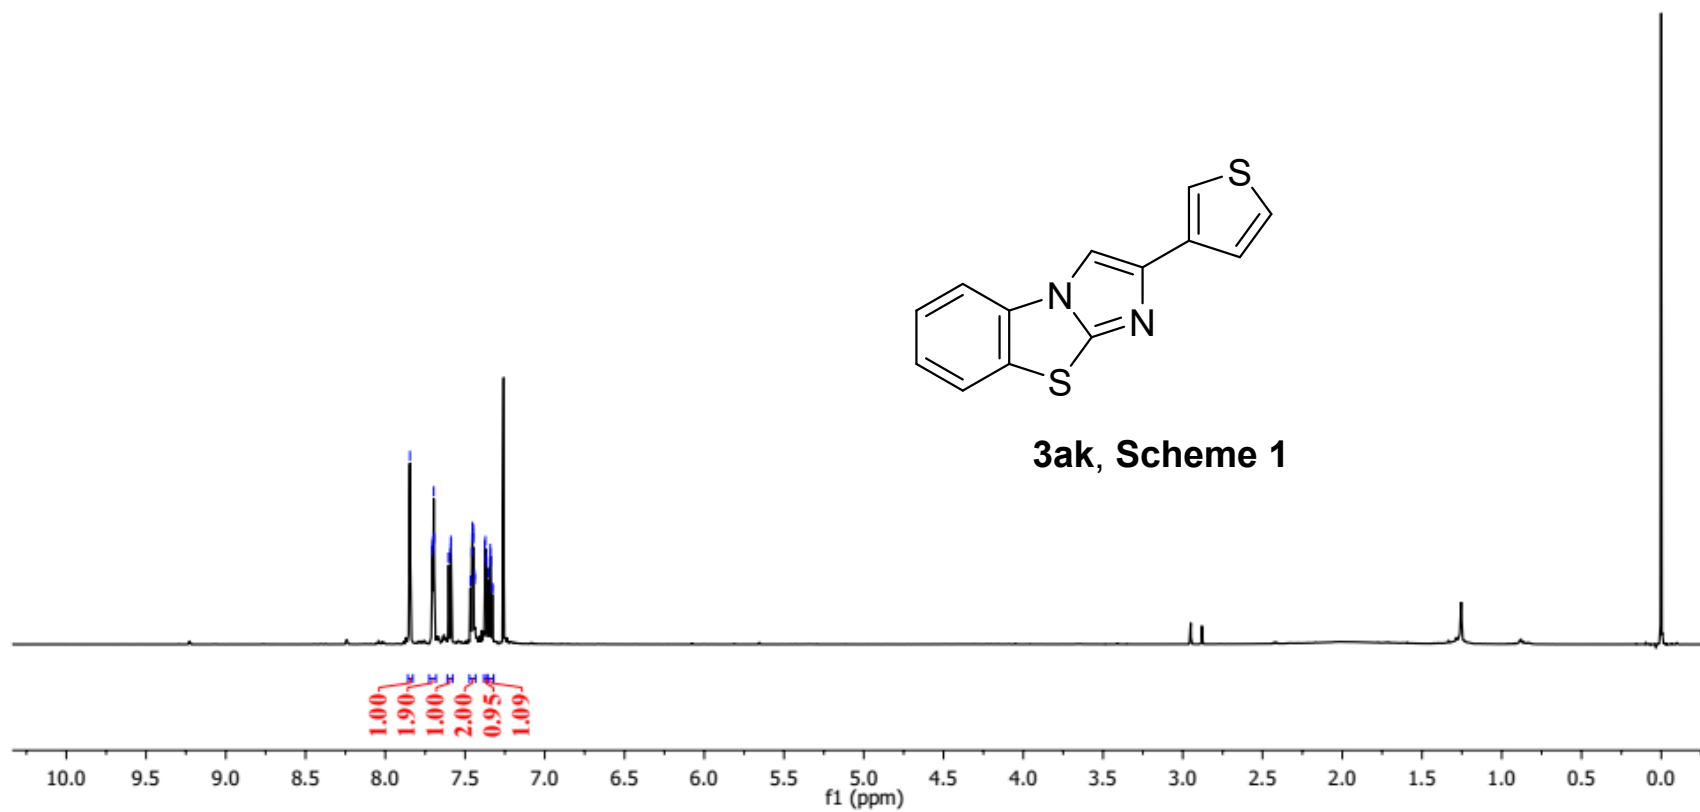

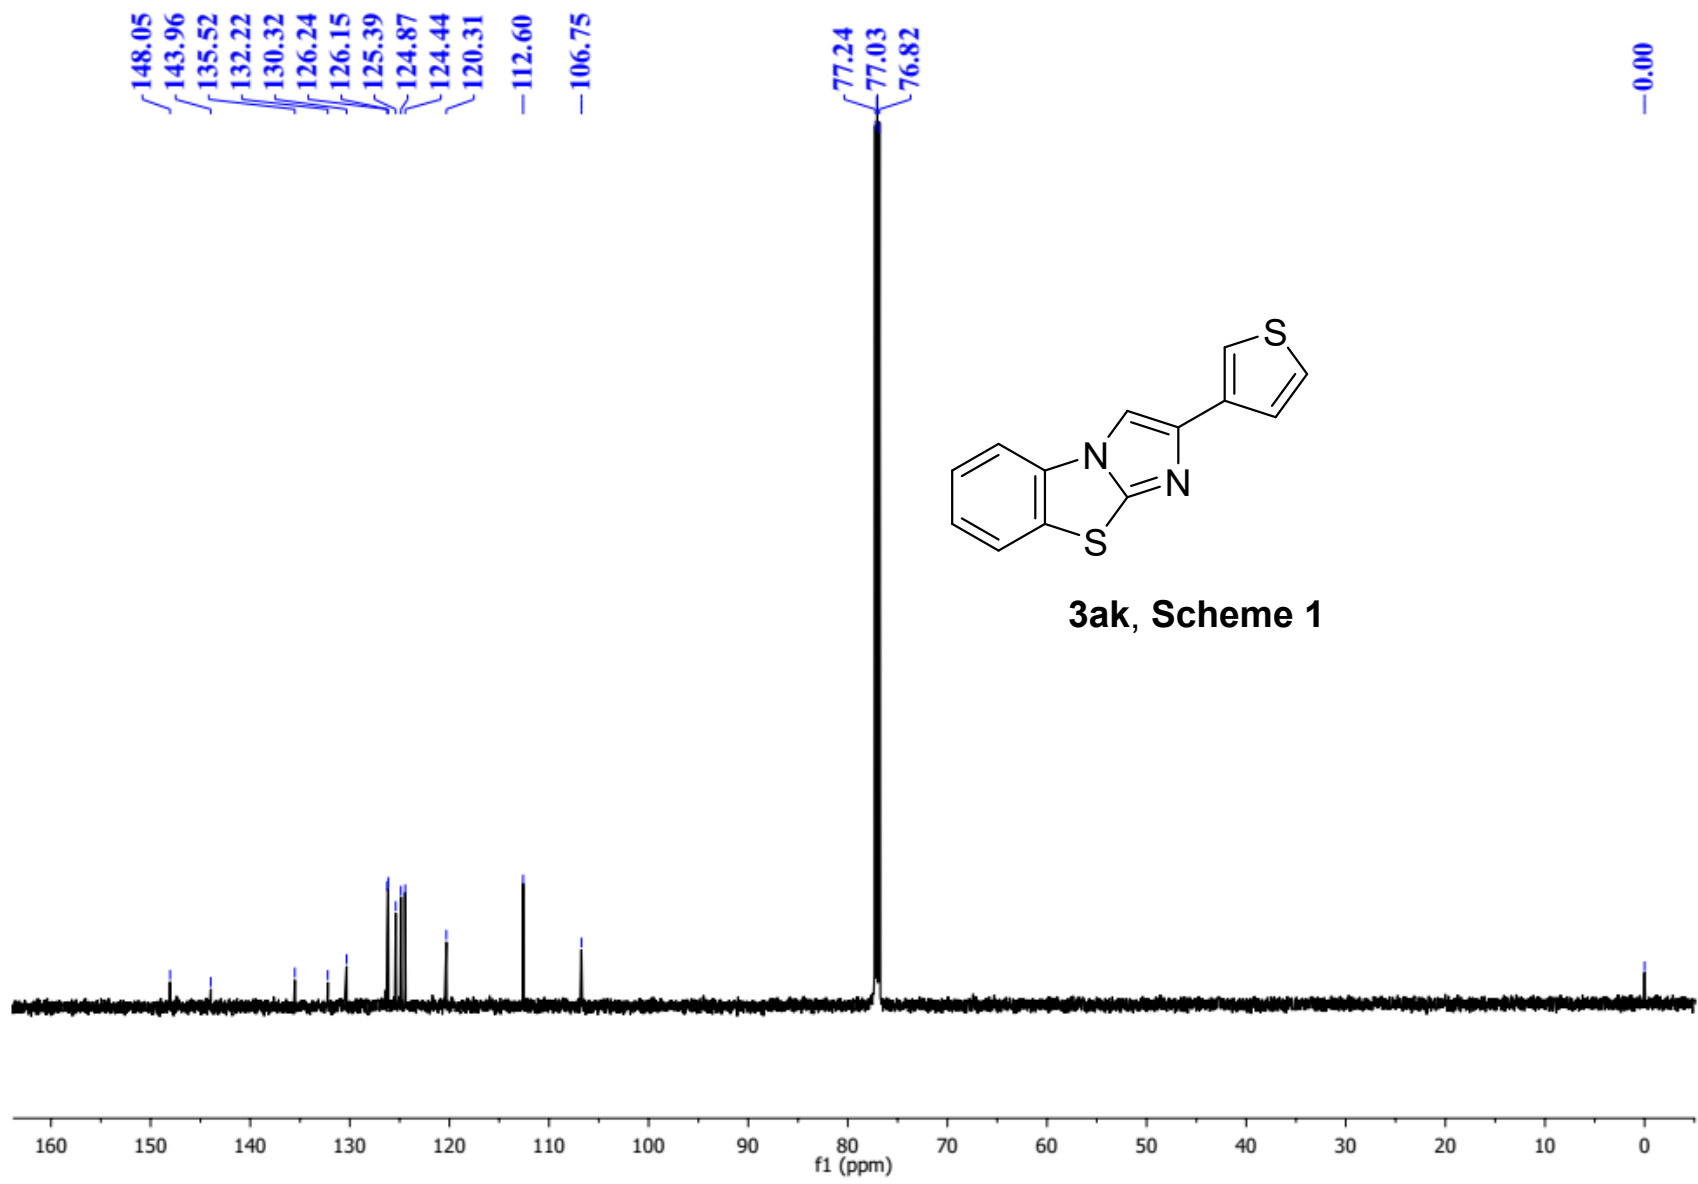

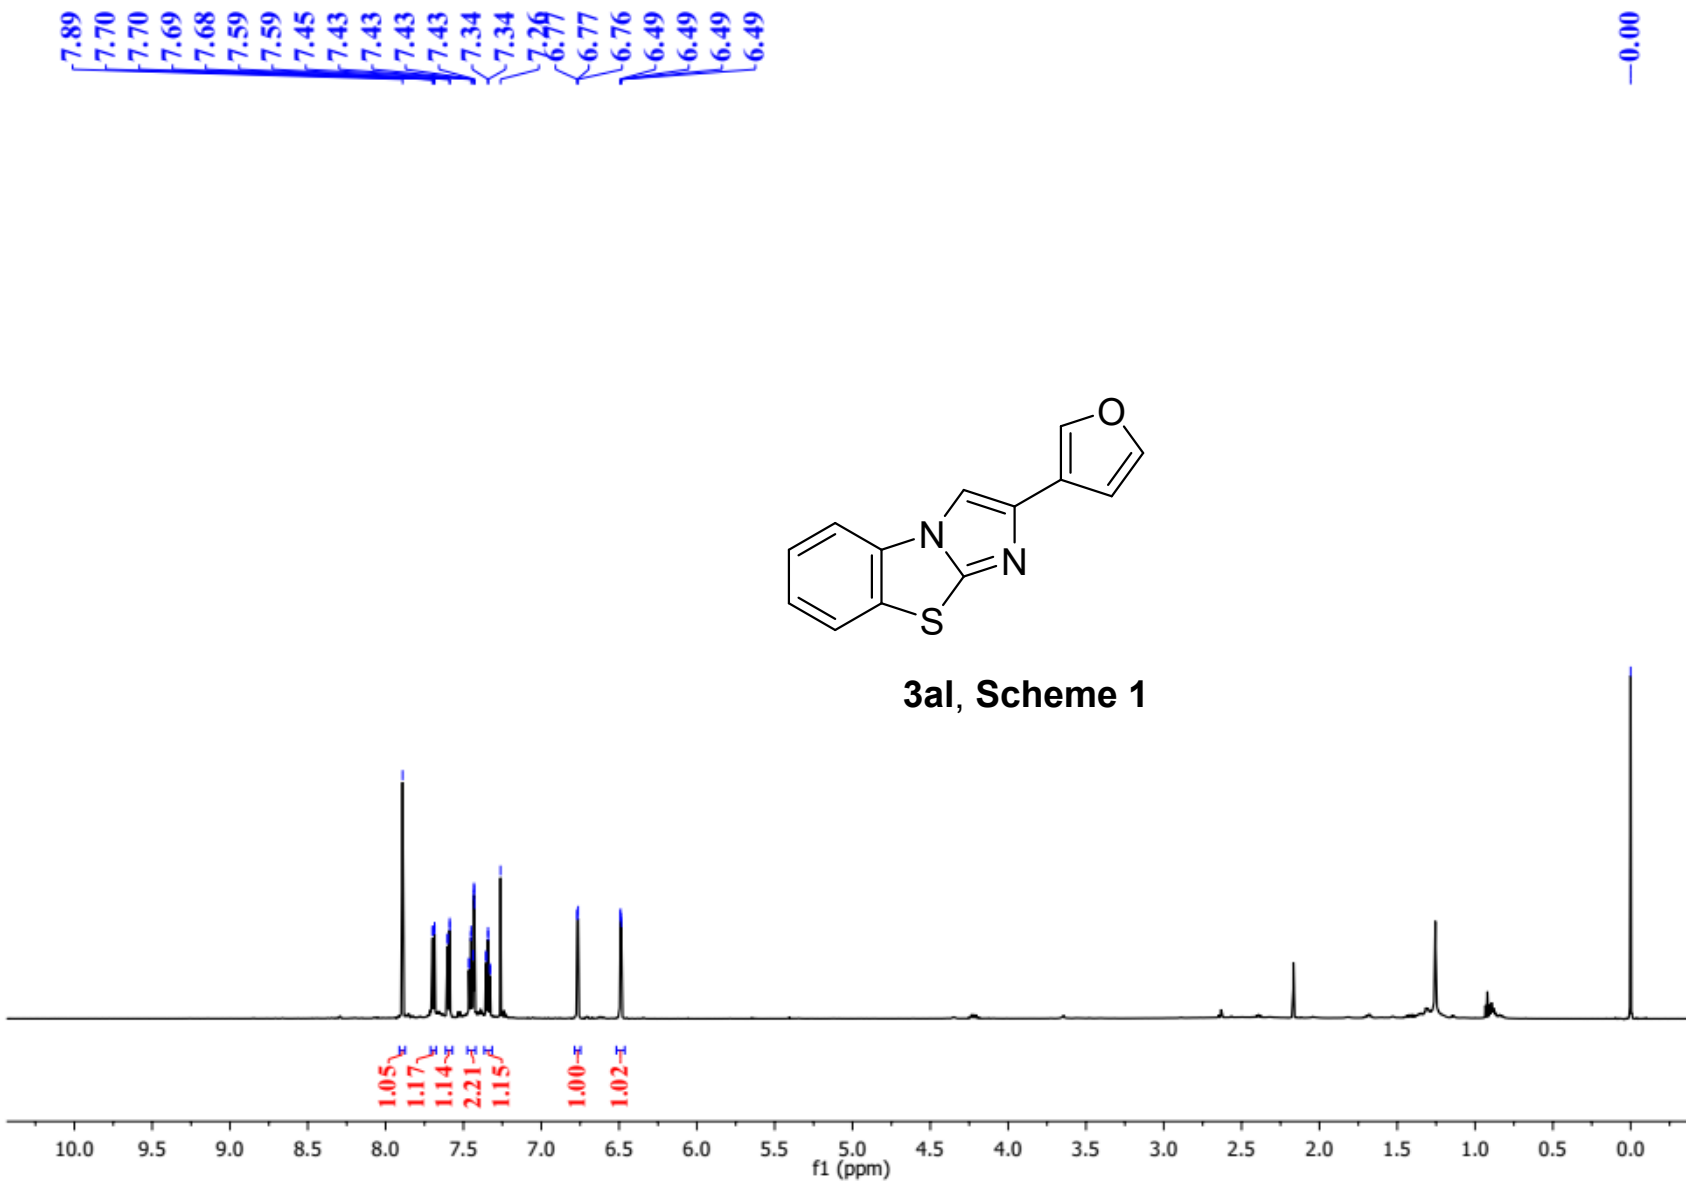

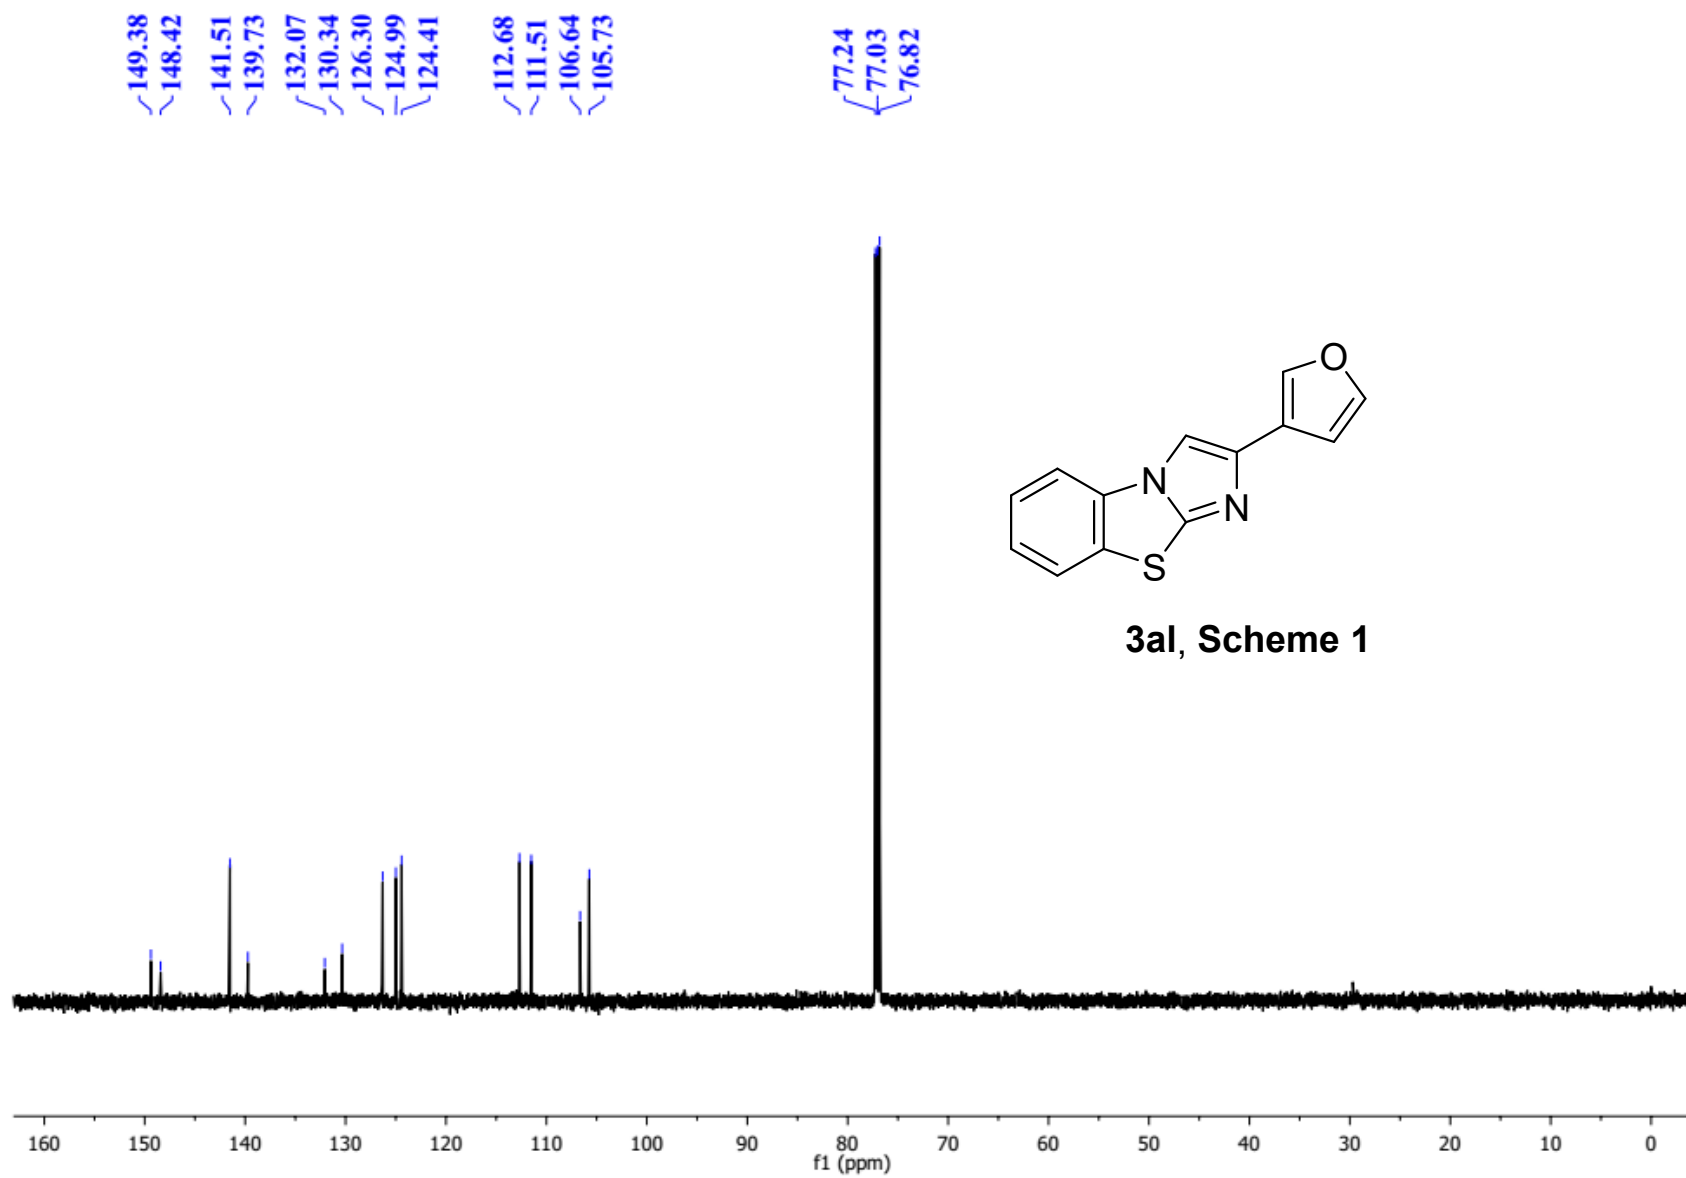

Supplement: d2ra08045a1.pdf [file d2ra08045a1.pdf]
